# Supplementary material for: Comparative Analysis of Enzyme Production Patterns of Lignocellulose Degradation of Two White Rot Fungi: Obba rivulosa and Gelatoporia subvermispora
Source: MDPI journal article supplement (doi:10.3390/biom12081017), 2022-07-22
Supplement: s1 [file s1]

Archive with 3 entries (3 files):
- biomolecules-1773565-supplementary/biomolecules-1773565-supplementary-Figure S1 new-done.pdf
- biomolecules-1773565-supplementary/biomolecules-1773565-supplementary-Figure S2 revised-done.pdf
- biomolecules-1773565-supplementary/Table S1_revised.xlsx
