# Supplementary material for: Comparative Analysis of Enzyme Production Patterns of Lignocellulose Degradation of Two White Rot Fungi: Obba rivulosa and Gelatoporia subvermispora
Source: MDPI journal article supplement (doi:10.3390/biom12081017), 2022-07-22
Supplement: s1 [file s1 › biomolecules-1773565-supplementary/biomolecules-1773565-supplementary-Figure S1 new-done.pdf]

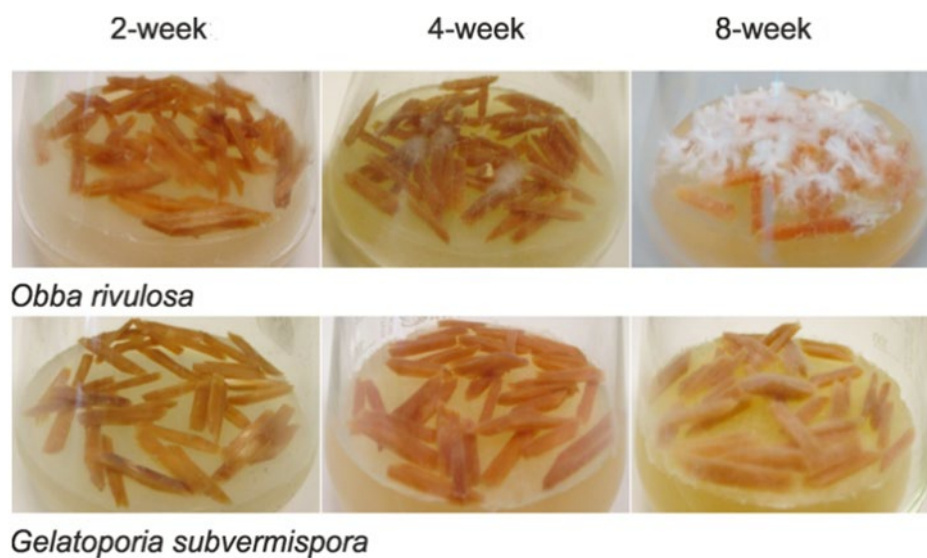

**Figure S1.** Fungal growth on spruce wood sticks for 2, 4 and 8 weeks. (a) *O. rivulosa* monokaryon 3A-2 and (b) *G. subvermispora* monokaryon RP-B.
