# Supplementary material for: Comparative Analysis of Enzyme Production Patterns of Lignocellulose Degradation of Two White Rot Fungi: Obba rivulosa and Gelatoporia subvermispora
Source: MDPI journal article supplement (doi:10.3390/biom12081017), 2022-07-22
Supplement: s1 [file s1 › biomolecules-1773565-supplementary/biomolecules-1773565-supplementary-Figure S2 revised-done.pdf]

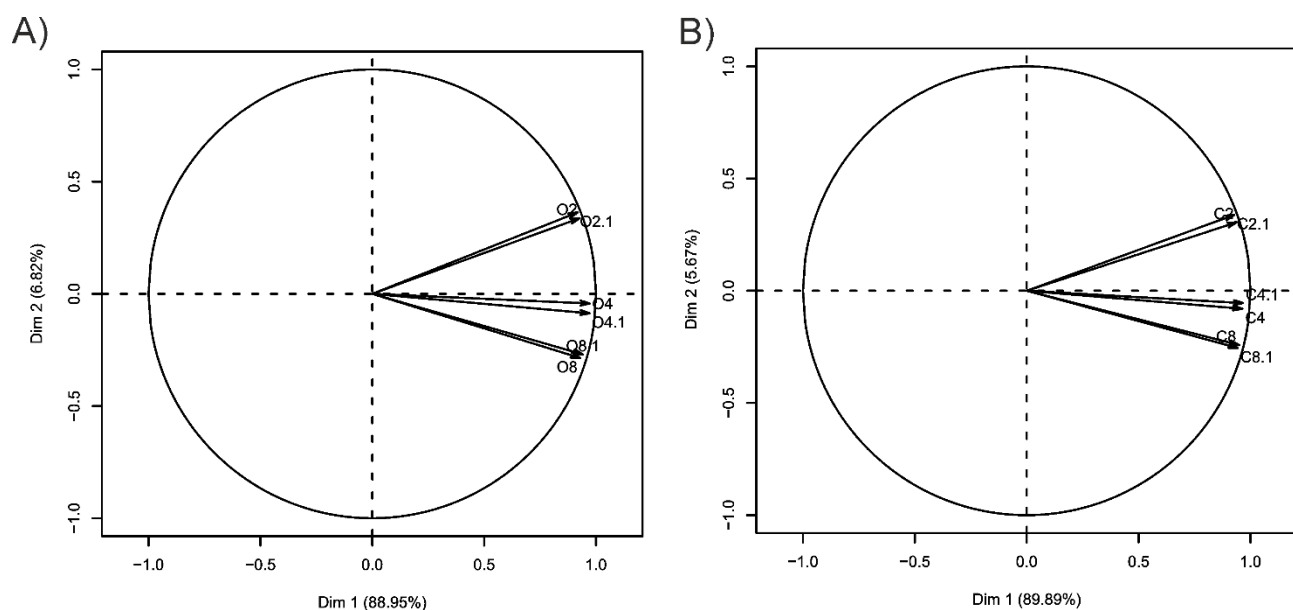

**Figure S2.** Principal component analysis (PCA) of the proteomes of (a) *O. rivulosa* and (b) *G. subvermispora*. Two biological replicates used for the LC-MS/MS analysis from 2-, 4- and 8-week cultivations on spruce wood are shown. O\_2 and O\_2.1, *O. rivulosa* 2-week samples; O\_4 and O\_4.1, *O. rivulosa* 4-week samples; O\_8 and O\_8.1, *O. rivulosa* 8-week samples. C\_2 and C\_2.1, *G. subvermispora* 2-week samples; C\_4 and C\_4.1, *G. subvermispora* 4-week samples; C\_8 and C\_8.1, *G. subvermispora* 8-week samples.
