# Supplementary material for: Comparative Analysis of Enzyme Production Patterns of Lignocellulose Degradation of Two White Rot Fungi: Obba rivulosa and Gelatoporia subvermispora
Source: MDPI journal article supplement (doi:10.3390/biom12081017), 2022-07-22
Supplement: s1 [file s1 › biomolecules-1773565-supplementary/Table S1_revised.xlsx]

## Sheet: O. rivulosa_IP values
Supplementary Table S1(A): Plant cell wall degrading CAZymes detected in the proteome of O. rivulosa during cultivation on solid spruce wood during the time course of 8 weeks.
Enzyme abbreviations: ABF = α-arabinofuranosidase, AGD = α-glucosidase, AGL = α-galactosidase, AGU = α-glucuronidase, AOX = alcohol oxidase, BGL = β-1,4-glucosidase, BXL = β-1,4-xylosidase, CBHI = cellobiohydrolase (reducing end), CBHII = cellobiohydrolase (non-reducing end),
CDH = cellobiose dehydrogenase, EGL = β-1,4-endoglucanase, GE = 4-O-methyl-glucuronyl methylesterase, GAL = β-endogalactanase, GLA = glucoamylase, GOX = glucose oxidase, HAE = hemicellulose acetylesterase, LAC = β-1,4-galactosidase, LCC = laccase, LPMO = lytic polysaccharide monooxygenase, MAN = β-1,4-endomannanase,
MND = β-1,4-mannosidase, MnP = manganese peroxidase, XG-EG = xyloglucanase, XLN = xylanase.
IP values = Ion Profile values.
					Protein abundance (IP values)
					Time point (weeks)
Protein ID	CAZy	Enzyme	Description	Plant biomass substrate	2	4	8
452017	AA1_1	LCC	Multicopper oxidase	lignin	25.9395	5.17833	--
727100	AA2	MnP	Class II peroxidase	lignin	26.7592	--	--
891614	AA2	MnP	Class II peroxidase	lignin	59.04	--	4.58673
438941	AA2	MnP	Class II peroxidase	lignin	6.57455	--	--
885712	AA3_2	GOX	GMC oxidoreductase	H2O2-supply	30.4795	9.63226	9.77461
790443	AA3_3	AOX	GMC oxidoreductase	H2O2-supply	408.497	132.454	143.689
664751	AA8-AA3_1	CDH	Iron reductase domain / GMC oxidoreductase	cellulose	21.0286	5.92638	6.5336
770661	GH1	BGL	Glycoside Hydrolase Family 1 protein	cellulose	6.64171	8.69377	11.983
731281	GH1	BGL	Glycoside Hydrolase Family 1 protein	cellulose	--	--	10.6964
627233	GH3	BGL	Glycoside Hydrolase Family 3 protein	cellulose	14.5452	9.6218	22.408
788396	GH3	BGL	Glycoside Hydrolase Family 3 protein	cellulose	8.42021	15.6214	30.4849
784936	GH3	BGL	Glycoside Hydrolase Family 3 protein	cellulose	15.0767	12.826	13.2317
788967	CBM1-GH5_5	EGL	Carbohydrate-Binding Module Family 1 / Glycoside Hydrolase Family 5 protein	cellulose	28.1809	13.2972	24.2556
476379	CBM1-GH6	CBHII	Carbohydrate-Binding Module Family 1 / Glycoside Hydrolase Family 6 protein	cellulose	37.3787	5.54959	--
731121	GH7-CBM1	CBHI	Glycoside Hydrolase Family 7 / Carbohydrate-Binding Module Family 1 protein	cellulose	83.0223	28.9001	11.451
91658	GH7-CBM1	CBHI	Glycoside Hydrolase Family 7 / Carbohydrate-Binding Module Family 1 protein	cellulose	6.34418	11.803	23.1035
812963	GH131	EGL	Glycoside Hydrolase Family 131 protein	cellulose	42.6406	16.4002	15.4767
813927	GH2	MND	Glycoside Hydrolase Family 2 protein	galacto(gluco)mannan	20.9141	14.4485	28.6225
753990	GH2	MND	Glycoside Hydrolase Family 2 protein	galacto(gluco)mannan	24.8256	18.2752	29.7254
719765	GH5_7	MAN	Glycoside Hydrolase Family 5 protein	galacto(gluco)mannan	35.5679	16.8361	19.0277
641261	CBM1-GH5_7	MAN	Carbohydrate-Binding Module Family 1 / Glycoside Hydrolase Family 5 protein	galacto(gluco)mannan	214.341	68.2441	69.6296
849432	GH27	AGL	Glycoside Hydrolase Family 27 protein	galacto(gluco)mannan	26.4224	17.7862	18.6637
13793	GH27	AGL	Glycoside Hydrolase Family 27 protein	galacto(gluco)mannan	8.7509	--	--
849398	GH27	AGL	Glycoside Hydrolase Family 27 protein	galacto(gluco)mannan	11.1789	8.95179	8.96104
819531	GH5_22	BXL	Glycoside Hydrolase Family 5 protein	xylan	21.1798	31.7708	47.5647
826236	GH5_22	BXL	Glycoside Hydrolase Family 5 protein	xylan	5.85786	10.2192	15.5659
799009	GH10	XLN	Glycoside Hydrolase Family 10 protein	xylan	10.3948	--	--
786094	GH10	XLN	Glycoside Hydrolase Family 10 protein	xylan	--	7.54066	13.9444
838746	CBM1-GH10	XLN	Carbohydrate-Binding Module Family 1 / Glycoside Hydrolase Family 10 protein	xylan	165.972	25.7369	13.5298
851185	CBM1-GH10	XLN	Carbohydrate-Binding Module Family 1 / Glycoside Hydrolase Family 10 protein	xylan	43.4051	--	--
762583	CBM1-GH10	XLN	Carbohydrate-Binding Module Family 1 / Glycoside Hydrolase Family 10 protein	xylan	7.65242	12.3909	26.0027
726547	GH115	AGU	Glycoside Hydrolase Family 115 protein	xylan	13.6255	7.06904	14.4169
762191	CE15	GE	Carbohydrate Esterase Family 15 protein	xylan	16.0169	12.6842	12.0685
808997	GH74	XG-EG	Glycoside Hydrolase Family 74 protein	xyloglucan	14.1678	--	5.70451
812469	GH15-CBM20	GLA	Glycoside Hydrolase Family 15 / Carbohydrate-Binding Module Family 20 protein	starch	57.8178	10.4538	7.56026
723211	GH53	GAL	Glycoside Hydrolase Family 53 protein	pectin	5.20623	--	--
821398	AA9	LPMO	Lytic polysaccharide monooxygenase	diverse	46.1271	14.7664	--
799019	AA9	LPMO	Lytic polysaccharide monooxygenase	diverse	9.19251	--	--
796835	AA9	LPMO	Lytic polysaccharide monooxygenase	diverse	13.8728	24.4148	21.8537
833133	AA9-CBM1	LPMO	Lytic polysaccharide monooxygenase / Carbohydrate-Binding Module Family 1	diverse	49.9913	22.197	26.5557
724015	CE16	HAE	Carbohydrate Esterase Family 16 protein	hemicellulose	110.475	50.328	31.5245
816606	CE16	HAE	Carbohydrate Esterase Family 16 protein	hemicellulose	17.4575	--	--
864632	CE16	HAE	Carbohydrate Esterase Family 16 protein	hemicellulose	4.55681	--	6.92615
749512	CBM1-CE16	HAE	Carbohydrate-Binding Module Family 1 / Carbohydrate Esterase Family 16 protein	hemicellulose	21.5668	--	--
789567	GH35	LAC	Glycoside Hydrolase Family 35 protein	diverse	36.5159	29.0318	51.6779
790347	GH51	ABF	Glycoside Hydrolase Family 51 protein	diverse	4.91988	--	--

## Sheet: O.rivulosa_ALL CAZymes
Supplementary Table S1(B): All the CAZymes detected in the proteome of O. rivulosa during cultivation on solid spruce wood during the time course of 8 weeks.
Enzyme abbreviations: ABF = α-arabinofuranosidase, AGD = α-glucosidase, AGL = α-galactosidase, AGU = α-glucuronidase, AOX = alcohol oxidase, BGL = β-1,4-glucosidase, BQR = benzoquinone reductase, BXL = β-1,4-xylosidase, CBHI = cellobiohydrolase (reducing end), CBHII = cellobiohydrolase (non-reducing end),
CDH = cellobiose dehydrogenase, EGL = β-1,4-endoglucanase, GE = 4-O-methyl-glucuronyl methylesterase, GAL = β-endogalactanase, GLA = glucoamylase, GOX = glucose oxidase, HAE = hemicellulose acetylesterase, LAC = β-1,4-galactosidase, LCC = laccase, LPMO = lytic polysaccharide monooxygenase, MAN = β-1,4-endomannanase,
MND = β-1,4-mannosidase, MnP = manganese peroxidase, NPCWDE = non plant cell wall degrading enyzme, XG-EG = xyloglucanase, XLN = xylanase.
IP values = Ion Profile values.
				Protein abundance (IP values)
				Time point (weeks)
Protein ID	CAZy	Enzyme	Description	2	4	8
452017	AA1_1	LCC1	Multicopper oxidase	25.9395	5.17833	1
727100	AA2	MnP	Class II peroxidase	26.7592	2	--
891614	AA2	MnP	Class II peroxidase	59.04	4	4.58673
438941	AA2	MnP	Class II peroxidase	6.57455	2	--
511960	AA2	MnP	Class II peroxidase	--	--	3.20871
885712	AA3_2	GOX	GMC oxidoreductase	30.4795	9.63226	9.77461
789242	AA3_2	GOX	GMC oxidoreductase	4.00983	2.89504	4.1279
790443	AA3_3	AOX	GMC oxidoreductase	408.497	132.454	143.689
792863	AA3_3	AOX	GMC oxidoreductase	2.13979	--	0.955083
795134	AA6	BQR	Benzoquinone reductase	59.1241	81.7483	99.9564
664751	AA8-AA3_1	CDH	Iron reductase domain / GMC oxidoreductase	21.0286	5.92638	6.5336
821398	AA9	LPMO	Lytic polysaccharide monooxygenase	46.1271	14.7664	2
799019	AA9	LPMO	Lytic polysaccharide monooxygenase	9.19251	1	1
796835	AA9	LPMO	Lytic polysaccharide monooxygenase	13.8728	24.4148	21.8537
833133	AA9-CBM1	LPMO	Lytic polysaccharide monooxygenase	49.9913	22.197	26.5557
889978	GH1	LAC	Glycoside Hydrolase Family 1 protein	2	1	2
770661	GH1	BGL	Glycoside Hydrolase Family 1 protein	6.64171	8.69377	11.983
731281	GH1	BGL	Glycoside Hydrolase Family 1 protein	4	4	10.6964
813927	GH2	MND	Glycoside Hydrolase Family 2 protein	20.9141	14.4485	28.6225
753990	GH2	MND	Glycoside Hydrolase Family 2 protein	24.8256	18.2752	29.7254
815162	GH2	MND	Glycoside Hydrolase Family 2 protein	1.542	0.939756	1.91435
627233	GH3	BGL	Glycoside Hydrolase Family 3 protein	14.5452	9.6218	22.408
788396	GH3	BGL	Glycoside Hydrolase Family 3 protein	8.42021	15.6214	30.4849
784936	GH3	BGL	Glycoside Hydrolase Family 3 protein	15.0767	12.826	13.2317
627302	GH3	BGL	Glycoside Hydrolase Family 3 protein	2.43078	1.24911	1.71307
14692	GH3	BGL	Glycoside Hydrolase Family 3 protein	4.181	2.07692	2.63481
337845	GH3	BXL	Glycoside Hydrolase Family 3 protein	3.11014	1.59681	3.28633
887036	GH3	NPCWDE	Glycoside Hydrolase Family 3 protein	0.992458	1.41328	2.36051
788967	CBM1-GH5_5	EGL	Carbohydrate-Binding Module Family 1 / Glycoside Hydrolase Family 5 protein	28.1809	13.2972	24.2556
789780	CBM1-GH5_5	EGL	Carbohydrate-Binding Module Family 1 / Glycoside Hydrolase Family 5 protein	0.6698	--	--
719765	GH5_7	MAN	Glycoside Hydrolase Family 5 protein	35.5679	16.8361	19.0277
641261	CBM1-GH5_7	MAN	Carbohydrate-Binding Module Family 1 / Glycoside Hydrolase Family 5 protein	214.341	68.2441	69.6296
885341	GH5_15	NPCWDE	Glycoside Hydrolase Family 15 protein	0.955434	--	0.680991
819531	GH5_22	BXL	Glycoside Hydrolase Family 5 protein	21.1798	31.7708	47.5647
826236	GH5_22	BXL	Glycoside Hydrolase Family 5 protein	5.85786	10.2192	15.5659
476379	CBM1-GH6	CBHII	Carbohydrate-Binding Module Family 1 / Glycoside Hydrolase Family 6 protein	37.3787	5.54959	4
731121	GH7-CBM1	CBHI	Glycoside Hydrolase Family 7 / Carbohydrate-Binding Module Family 1 protein	83.0223	28.9001	11.451
91658	GH7-CBM1	CBHI	Glycoside Hydrolase Family 7 / Carbohydrate-Binding Module Family 1 protein	6.34418	11.803	23.1035
799009	GH10	XLN	Glycoside Hydrolase Family 10 protein	10.3948	--	--
786094	GH10	XLN	Glycoside Hydrolase Family 10 protein	4	7.54066	13.9444
838746	CBM1-GH10	XLN	Carbohydrate-Binding Module Family 1 / Glycoside Hydrolase Family 10 protein	165.972	25.7369	13.5298
851185	CBM1-GH10	XLN	Carbohydrate-Binding Module Family 1 / Glycoside Hydrolase Family 10 protein	43.4051	1.37219	--
762583	CBM1-GH10	XLN	Carbohydrate-Binding Module Family 1 / Glycoside Hydrolase Family 10 protein	7.65242	12.3909	26.0027
726082	GH12	EGL	Glycoside Hydrolase Family 12 protein	2.43385	2.08249	2.85971
789477	CBM48-GH13_8	NPCWDE	Carbohydrate-Binding Module Family 48 / Glycoside Hydrolase Family 13 protein	0.597978	2.41594	4.9972
725317	GH13_32-CBM20	NPCWDE	Glycoside Hydrolase Family 13 / Carbohydrate-Binding Module Family 20 protein	3.21881	--	--
833127	GH15	GLA	Glycoside Hydrolase Family 15	1.19901	0.942015	2.05313
812469	GH15-CBM20	GLA	Glycoside Hydrolase Family 15 / Carbohydrate-Binding Module Family 20 protein	57.8178	10.4538	7.56026
791064	GH15-CBM20	GLA	Glycoside Hydrolase Family 15 / Carbohydrate-Binding Module Family 20 protein	2.58884	--	--
853185	GH16	NPCWDE	Glycoside Hydrolase Family 16	24.4223	--	0.544894
814646	GH17	NPCWDE	Glycoside Hydrolase Family 17	3.96812	1.84479	3.52686
838588	GH18	NPCWDE	Glycoside Hydrolase Family 18	3.80825	1.9252	6.98194
840015	GH18	NPCWDE	Glycoside Hydrolase Family 18	20.6326	7.16193	12.2503
597742	GH20	NPCWDE	Glycoside Hydrolase Family 20	0.790305	1.85542	3.33894
849432	GH27	AGL	Glycoside Hydrolase Family 27	26.4224	17.7862	18.6637
13793	GH27	AGL	Glycoside Hydrolase Family 27	8.7509	1.37435	2.7576
849398	GH27	AGL	Glycoside Hydrolase Family 27	11.1789	8.95179	8.96104
169586	GH31	AGD	Glycoside Hydrolase Family 31	10.5227	0.57053	0.539212
736445	GH31	AGD	Glycoside Hydrolase Family 31	2.97148	1.00369	1.99051
789567	GH35	LAC	Glycoside Hydrolase Family 35	36.5159	29.0318	51.6779
888455	GH38	NPCWDE	Glycoside Hydrolase Family 38	2.03344	2.45079	5.07067
796407	GH47	NPCWDE	Glycoside Hydrolase Family 47	2.98928	9.66128	41.6971
790347	GH51	ABF	Glycoside Hydrolase Family 51	4.91988	2.40485	2.57627
760626	GH51	ABF	Glycoside Hydrolase Family 51	2.79508	0.624259	0.929283
723211	GH53	GAL	Glycoside Hydrolase Family 53	5.20623	1.57029	3.07756
834199	GH55	NPCWDE	Glycoside Hydrolase Family 55	4.68979	--	1.36005
737766	GH55	NPCWDE	Glycoside Hydrolase Family 55	17.7837	3.25566	1.96741
788505	GH63	NPCWDE	Glycoside Hydrolase Family 63	8.762	1.88523	3.96854
808997	GH74	XG-EG	Glycoside Hydrolase Family 74	14.1678	4.00269	5.70451
340636	GH79	NPCWDE	Glycoside Hydrolase Family 79	64.2665	28.5851	45.1836
815167	GH88	UGH	Glycoside Hydrolase Family 88	3.26744	0.936576	1.76076
799066	GH92	NPCWDE	Glycoside Hydrolase Family 92	13.2446	6.44088	10.2994
832348	GH92	NPCWDE	Glycoside Hydrolase Family 92	5.57295	6.07532	12.4573
726547	GH115	AGU	Glycoside Hydrolase Family 115	13.6255	7.06904	14.4169
789398	GH125	NPCWDE	Glycoside Hydrolase Family 125	3.48965	0.700107	2.08401
812963	GH131	EGL	Glycoside Hydrolase Family 131	42.6406	16.4002	15.4767
762191	CE15	GE	Carbohydrate Esterase Family 15 protein	16.0169	12.6842	12.0685
721831	CE15	GE	Carbohydrate Esterase Family 15 protein	2.04339	1.5338	2.59761
724015	CE16	HAE	Carbohydrate Esterase Family 16 protein	110.475	50.328	31.5245
816606	CE16	HAE	Carbohydrate Esterase Family 16 protein	17.4575	2.41386	3.41331
864632	CE16	HAE	Carbohydrate Esterase Family 16 protein	4.55681	1.50845	6.92615
749512	CBM1-CE16	HAE	Carbohydrate-Binding Module Family 1 / Carbohydrate Esterase Family 16 protein	21.5668	3.37618	2.22739
735656	GT3	NPCWDE	Glycosyltransferase Family 3 protein	0.744898	1.63792	2.75603
809904	GT4	NPCWDE	Glycosyltransferase Family 4 protein	12.902	19.8687	34.4333
510860	GT8	NPCWDE	Glycosyltransferase Family 8 protein	--	1.49778	3.67888
722898	GT20	NPCWDE	Glycosyltransferase Family 20 protein	1.59927	2.60416	6.47285
819781	GT20	NPCWDE	Glycosyltransferase Family 20 protein	1.07968	1.56826	3.71684
781070	GT35	NPCWDE	Glycosyltransferase Family 35 protein	53.001	64.9843	60.5315
719152	PL8_4	NPCWDE	Polysaccharide Lyase Family 8 protein	8.23368	6.67885	10.4389

## Sheet: O. rivulosa_ALL
Supplementary Table S1(C): Total proteome of O. rivulosa during cultivation on solid spruce wood during the time course of 8 weeks.
2w A = 2-week sample, A duplicate; 2w B = 2-week sample, B duplicate; 4w A = 4-week sample, A duplicate; 4w B = 4-week sample, B duplicate; 8w A = 8-week sample, A duplicate; 8w B = 8-week sample, B duplicate.
FDR = False discovery rate; IP values = Ion Profile values; # PSM = number of Peptide Spectrum Matches.
Protein FDR Confidence: Sequest HT	Accession	Coverage [%]	# Peptides	# PSMs	# Unique Peptides	MW [kDa]	IP: 2 wA	IP: 2w B	IP: 4w A	IP: 4w B	IP: 8w A	IP: 8w B	predicted signal peptide	Merged_iprDesc
High	P02769_BSA	63	44	625	44	69.2	100	100	100	100	100	100
High	Obbri1_100132	23	11	96	11	71.8	12.4254	14.5308	7.38834	12.3153	22.9984	16.0614	YES	Peptidase S41
High	Obbri1_102536	52	18	221	12	42.9	23.2624	22.0306	25.6393	26.395	32.417	40.7434	NO	Aldo/keto reductase
High	Obbri1_103183	67	14	85	14	33.7	8.63147	12.1864	6.6251	16.096	16.1165	31.7678	NO	MaoC-like dehydratase
High	Obbri1_120423	42	7	34	7	27.5	5.78607	6.33743	10.2544	14.3823	9.41949	16.869	NO	Short-chain dehydrogenase/reductase SDR; Glucose/ribitol dehydrogenase; NAD(P)-binding
High	Obbri1_126107	76	15	119	15	32.2	5.33319	5.98091	10.3817	17.9354	13.7043	26.2939	NO	Fumarylacetoacetase, C-terminal-like; Fumarylacetoacetase, C-terminal-related
High	Obbri1_13793	12	5	24	5	47.5	7.52148	9.98032	0.951019	1.79769	1.72019	3.795	YES	Glycoside hydrolase, clan GH-D; Glycoside hydrolase, family 27; Glycoside hydrolase, catalytic core
High	Obbri1_14692	8	4	11	4	85.5	5.27209	3.08991	2.07962	2.07421	2.69839	2.57123	YES	Glycoside hydrolase, family 3, N-terminal; Cellulose-binding region, fungal; Glycoside hydrolase, family 3, C-terminal; Glycoside hydrolase, catalytic core
High	Obbri1_156614	30	6	191	6	25.3	339.531	303.717	354.03	426.457	330.174	462.22	NO	Glutathione S-transferase, C-terminal; Glutathione S-transferase, N-terminal; Glutathione S-transferase, C-terminal-like; Thioredoxin-like fold
High	Obbri1_165751	19	14	83	14	92.8	5.64558	10.5313	5.71173	13.8889	6.91977	14.0916	NO	Protease-associated PA; Transferrin receptor-like, dimerisation; Peptidase M28
High	Obbri1_166507	24	17	79	17	99.1	9.62722	12.1387	15.1412	12.658	10.7326	8.15472	NO	Protease-associated PA; Transferrin receptor-like, dimerisation; Peptidase M28
High	Obbri1_169586	9	8	24	7	106.1	9.58853	11.4568	0.551555	0.589504	0.758123	0.320302	YES	Glycoside hydrolase, family 31; Cupredoxin
High	Obbri1_196619	53	4	37	4	11.8	13.033	13.1141	11.3423	13.2626	7.74913	10.0823	NO
High	Obbri1_197500	53	20	284	20	55.8	39.1005	64.3565	24.5474	25.3541	26.3354	26.6147	YES	Thioredoxin-related; Thioredoxin domain; Disulphide isomerase; Protein disulphide isomerase; Thioredoxin-like fold
High	Obbri1_198505	17	4	19	4	39.8	3.04433	3.14864	2.47889	9.2627	5.79272	15.4481	NO	Transketolase, central region; Transketolase, C-terminal; Transketolase, C-terminal/Pyruvate-ferredoxin oxidoreductase, domain II
High	Obbri1_200140	11	10	12	10	134.8	1.16054	0.800703	2.02526	1.32477	2.85862	3.69502	NO	WD40 repeat; Coatomer, WD associated region; Coatomer, alpha subunit, C-terminal; Coatomer, alpha subunit; WD40 repeat-like; Cytochrome cd1-nitrite reductase-like, C-terminal haem d1
High	Obbri1_206039	5	4	9	4	103.1	1.3865	1.54247	1.24318	2.37623	2.61959	2.81841	NO	WW/Rsp5/WWP; Gelsolin region; Zinc finger, Sec23/Sec24-type; Sec23/Sec24 trunk region; Sec23/Sec24 helical region; Sec23/Sec24 beta-sandwich
High	Obbri1_208538	29	7	49	7	34.2	3.19589	4.24003	3.25515	5.88333	5.8286	9.0286	NO	Glucose/ribitol dehydrogenase; Short-chain dehydrogenase/reductase SDR; NAD(P)-binding
High	Obbri1_212153	11	4	15	4	36.9	24.6089	7.8308	21.0087	10.3852	33.6039	9.45343	NO	Ubiquitin-associated/translation elongation factor EF1B, N-terminal; Translation elongation factor EFTs/EF1B, dimerisation; Translation elongation factor EFTs/EF1B; UBA-like
High	Obbri1_212326	7	3	5	3	54.2	0.844879	0.917043	0.87631	1.34097	1.9303	2.48252	NO	UTP--glucose-1-phosphate uridylyltransferase
High	Obbri1_213200	37	9	25	7	31.1	2.64969	1.65209	1.85727	5.29051	5.91428	8.13759	NO	Glutathione S-transferase, omega-class; Glutathione S-transferase, C-terminal; Glutathione S-transferase, N-terminal; Glutathione S-transferase, C-terminal-like; Thioredoxin-like fold
High	Obbri1_213377	16	5	10	5	44.6	1.71529	1.6492	2.54452	2.40514	3.62241	3.40357	NO	Aromatic-ring hydroxylase; Monooxygenase, FAD-binding
High	Obbri1_222997	30	7	37	6	30.9	1.64117	1.51729	8.87484	5.22966	11.6664	2.52435	NO	Short-chain dehydrogenase/reductase SDR; Glucose/ribitol dehydrogenase; NAD(P)-binding
High	Obbri1_225298	23	4	34	4	33.4	2.46595	1.70995	2.90982	1.97205	4.37815	3.3672	NO	dTDP-4-dehydrorhamnose reductase; SANT, DNA-binding; Oxidoreductase, molybdopterin binding; NAD(P)-binding
High	Obbri1_225367	15	9	20	9	85.4	2.23239	0.707699	2.24712	1.3655	4.14519	2.44192	NO	Gelsolin region; Zinc finger, Sec23/Sec24-type; Sec23/Sec24 trunk region; Sec23/Sec24 helical region; Sec23/Sec24 beta-sandwich
High	Obbri1_237224	9	4	9	2	59.9		1.32139		2.29485		3.72299	NO	Cytochrome b5; FMN-dependent alpha-hydroxy acid dehydrogenase; FMN-dependent alpha-hydroxy acid dehydrogenase, active site
High	Obbri1_238255	43	7	105	6	17.4	35.1326	33.0654	26.2887	15.3791	40.192	29.5855	NO	Peptidyl-prolyl cis-trans isomerase, cyclophilin-type; Cyclophilin-like
High	Obbri1_244078	16	5	9	5	40.5	3.89163	4.88811	3.82365	6.30265	3.26711	5.78886	NO
High	Obbri1_260407	9	3	9	3	38.2	2.5396	1.17558	3.70955	0.113013	8.42988	3.21249	NO	WD40 repeat; G-protein, beta subunit; Guanine nucleotide-binding protein, beta subunit; WD40 repeat-like
High	Obbri1_261071	10	4	9	4	70.3			0.965522		8.91574		YES	Amidase signature enzyme
High	Obbri1_261394	24	6	34	6	35.3	4.42597	3.97459	8.65128	8.91841	16.3397	16.8585	NO	Heat shock protein 70; Protein of unknown function DUF28; Heat shock protein Hsp70
High	Obbri1_270469	20	6	15	6	53.4				0.0435866	10.3724	0.733623	NO
High	Obbri1_27402	36	7	15	7	39.2	1.18529	0.553829	2.0889	0.937971	4.85066	2.557	NO	Homoserine dehydrogenase, catalytic; Aspartate/homoserine dehydrogenase, NAD-binding; NAD(P)-binding
High	Obbri1_274779	6	2	4	1	34.1	1.74556	3.60006	0.531768	0.367823		0.219973	YES	Concanavalin A-like lectin/glucanase
High	Obbri1_277005	47	13	51	13	40.9	4.83494	4.2105	5.64564	8.18809	8.57928	14.6075	NO	Oxidoreductase, N-terminal; NAD(P)-binding
High	Obbri1_278079	47	14	103	14	51.4	40.9417	32.768	20.3028	15.9602	0.16097	0.891992	YES	O-methyltransferase, family 2; Orn/DAP/Arg decarboxylase 2
High	Obbri1_28004	13	5	10	5	64.7	2.31009	0.613445	0.57032	0.415096	9.64783	0.114588	NO	Tyrosinase; Di-copper centre-containing
High	Obbri1_280711	12	2	5	2	32.2				0.350923	1.25068	2.01478	NO	Alpha/beta hydrolase fold-1
High	Obbri1_287128	68	14	159	14	32.2	17.9712	25.4051	31.58	48.8727	29.6322	24.2806	NO	Aldo/keto reductase
High	Obbri1_287373	43	19	88	19	62.2	2.51354	4.0272	4.15923	9.58925	6.71016	20.2148	NO	Malic oxidoreductase; Malic enzyme, N-terminal; Malic enzyme, NAD-binding; Malic enzyme, conserved site; NAD(P)-binding
High	Obbri1_292188	55	17	133	17	43.3	9.97247	11.9987	14.6944	16.981	29.054	33.1739	NO	Thiolase; Thiolase-like
High	Obbri1_293892	33	10	34	10	37.5	14.1368	12.681	0.160875	0.194317			NO	Mannose-binding lectin
High	Obbri1_299503	41	9	56	9	31.7	9.55622	9.75577	4.96579	4.42976	9.01452	6.45522	NO	Glucosamine/galactosamine-6-phosphate isomerase; Glucosamine-6-phosphate isomerase
High	Obbri1_311317	49	8	58	7	25.6	9.95861	11.9248	8.77006	12.4954	2.27477	2.27541	NO	Glucose/ribitol dehydrogenase; Short-chain dehydrogenase/reductase SDR; NAD(P)-binding
High	Obbri1_311341	65	12	95	12	25.2	21.304	30.7494	14.1566	20.435	11.5315	16.6518	NO	Glucose/ribitol dehydrogenase; Short-chain dehydrogenase/reductase SDR; NAD(P)-binding
High	Obbri1_315035	60	17	156	17	46.5	18.9268	19.8456	36.7966	52.5868	29.4765	66.5297	NO	Cys/Met metabolism, pyridoxal phosphate-dependent enzyme; O-acetylhomoserine/O-acetylserine sulfhydrylase; Pyridoxal phosphate-dependent transferase, major region
High	Obbri1_327300	7	2	7	2	48.1	11.0848	5.75302	3.77614	1.10425	1.45087	0.775651	YES	Major royal jelly protein
High	Obbri1_328226	5	4	7	4	105.8	0.196773	0.440583	0.644533	1.81223	0.648607	3.42114	NO	Hydantoinase/oxoprolinase; Hydantoinaseoxoprolinase, N-terminal; Protein of unknown function DUF917
High	Obbri1_337845	12	6	14	6	87.9	3.48695	2.73333	2.05934	1.13427	4.34417	2.22849	YES	Glycoside hydrolase, family 3, N-terminal; Glycoside hydrolase, family 3, C-terminal; Glycoside hydrolase, catalytic core
High	Obbri1_340636	9	4	88	4	58	62.8733	65.6598	28.8273	28.3428	55.2918	35.0754	NO
High	Obbri1_349638	42	8	83	8	29.7	7.12225	9.37695	22.1393	19.3254	28.5169	17.086	NO	Methyltransferase type 11
High	Obbri1_355276	6	2	25	1	67.7	6.17794	5.26961	7.11536	5.0338	9.51846	7.97174	NO
High	Obbri1_355689	30	12	82	12	41.2	9.99693	8.52067	14.3067	17.0508	19.14	24.5102	NO	Polyprenyl synthetase; Terpenoid synthase
High	Obbri1_356468	46	17	82	17	60.1	0.774056	1.10387	8.50782	12.6384	12.2332	18.0262	NO	Amidase signature enzyme
High	Obbri1_358687	25	4	16	4	21.6	2.7451	1.90228	3.16076	2.67271	4.09006	1.85822	NO	Calycin-like
High	Obbri1_367701	14	7	22	7	66.2	1.4741	1.69079	1.26401	2.83689	2.73587	3.7092	NO	HEAT; Armadillo-type fold
High	Obbri1_375718	56	15	101	15	40.7	11.7046	7.77594	6.37739	7.58899	13.656	8.5786	NO	NADH:flavin oxidoreductase/NADH oxidase, N-terminal
High	Obbri1_383364	39	8	16	8	26.5	0.673188		1.39992	0.178483	10.2839	0.624571	NO	Short-chain dehydrogenase/reductase SDR; Glucose/ribitol dehydrogenase; NAD(P)-binding
High	Obbri1_404261	47	17	100	15	47	12.502	12.6837	14.0022	15.2028	11.6084	12.3031	NO	NADH:flavin oxidoreductase/NADH oxidase, N-terminal
High	Obbri1_409895	18	7	45	7	61.1	6.92566	8.63565	6.99702	8.92481	5.55479	9.32943	NO	Carboxylesterase, type B
High	Obbri1_4161	30	9	21	8	46.8	2.08236	0.538279	1.45247	0.658567	7.09124	1.88556	NO	Aspartate/other aminotransferase; Aminotransferase, class I and II; Aminotransferases, class-I, pyridoxal-phosphate-binding site; Pyridoxal phosphate-dependent transferase, major region
High	Obbri1_418596	1	3	9	3	392.2	18.1219	12.1263	14.4041	54.0774	19.9839	13.2752	NO	Dynein heavy chain; ATPase associated with various cellular activities, AAA-5; Dynein heavy chain, N-terminal region 2; AAA+ ATPase, core; Peptidase, cysteine peptidase active site; Glutathione S-transferase, C-terminal-like
High	Obbri1_426312	16	12	144	12	94.6	14.0622	23.4753	24.723	32.1334	30.2308	28.3455	YES	Peptidase S8 and S53, subtilisin, kexin, sedolisin; Protease-associated PA
High	Obbri1_432290	50	7	15	7	19.5	2.08238	0.924753	4.06719	1.57992	1.07098	2.06473	NO	Protein of unknown function DUF302
High	Obbri1_432350	65	23	231	23	61	35.2079	33.0627	25.0064	32.8232	33.9009	41.1844	NO	Alpha-D-phosphohexomutase, N-terminal; Alpha-D-phosphohexomutase, C-terminal; Alpha-D-phosphohexomutase, alpha/beta/alpha domain I; Alpha-D-phosphohexomutase, alpha/beta/alpha domain II; Alpha-D-phosphohexomutase, alpha/beta/alpha domain III; Alpha-D-phosphohexomutase, conserved site; Alpha-D-phosphohexomutase, alpha/beta/alpha I, II and III
High	Obbri1_43273	37	9	62	9	41.7	4.026	3.27388	7.21086	9.12175	8.3881	9.5011	NO	Iron-containing alcohol dehydrogenase
High	Obbri1_437989	15	4	13	3	40.2	1.94649	0.843385	3.10778	1.44045	7.7833	1.94398	NO	Aldo/keto reductase
High	Obbri1_438941	17	5	23	3	39.4	7.64506	5.50403	0.882919	2.68283	0.594585		YES	Haem peroxidase, plant/fungal/bacterial; Fungal lignin peroxidase; Haem peroxidase
High	Obbri1_439033	13	4	22	4	40	2.22512	2.23961	2.90618	4.44904	5.39269	6.82017	NO	ATPase, BadF/BadG/BcrA/BcrD type
High	Obbri1_441000	33	12	53	12	55	2.02169	1.92429	9.81331	10.5675	13.3267	12.4107	YES	Peptidase S10, serine carboxypeptidase
High	Obbri1_445365	14	4	18	4	47	0.877522	1.71418	1.47506	1.99973	2.13073	2.11909	NO	Proteasome component region PCI
High	Obbri1_448194	12	4	9	4	38.6	2.52769	1.22775	1.89712	0.777349	2.55628	0.860038	NO	Isocitrate/isopropylmalate dehydrogenase
High	Obbri1_452017	10	4	50	4	55.8	24.0684	27.8106	4.09397	6.2627	1.30846	1.30558	YES	Multicopper oxidase, type 1; Multicopper oxidase, type 2; Multicopper oxidase, type 3; Multicopper oxidase, copper-binding site; Cupredoxin
High	Obbri1_462124	19	5	14	5	24.2	0.729089	3.70501	1.17345	8.23807	0.917155	8.1584	YES	Peptidyl-prolyl cis-trans isomerase, cyclophilin-type; Cyclophilin-like
High	Obbri1_472866	57	15	64	15	24.3	11.1632	32.4655	10.2034	20.2381	7.13133	15.9778	NO	ThiJ/PfpI
High	Obbri1_476379	18	5	61	5	48	32.9509	41.8065	5.51058	5.5886	5.55398	2.66677	YES	Cellulose-binding region, fungal; Glycoside hydrolase, family 6; 1, 4-beta cellobiohydrolase
High	Obbri1_476533	17	6	33	6	59.9	6.36907	7.73447	2.34803	3.02513	1.21443	2.74522	YES	Carboxylesterase, type B
High	Obbri1_482062	68	15	196	15	37	16.1379	15.2272	15.4256	22.8162	24.0696	26.6086	NO	Aldo/keto reductase
High	Obbri1_49322	79	11	125	11	18	33.3111	33.8984	13.9265	19.7013	16.8506	20.1335	NO	Cyanase; Cyanate lyase, C-terminal; Lambda repressor-like, DNA-binding
High	Obbri1_497165	9	4	8	4	60.8	0.613371	2.85508	0.62344	1.26615	0.87291	1.59499	NO	Chaperonin Cpn60; Chaperonin Cpn60/TCP-1; T-complex protein 1, eta subunit; Protein kinase ATP binding, conserved site; Chaperonin TCP-1, conserved site; GroEL-like chaperone, ATPase
High	Obbri1_499167	7	4	18	2	39.8	0.420966	0.441128	0.74723	1.32677	0.511642	1.26943	NO	Aldo/keto reductase; Potassium channel, voltage-dependent, beta subunit, KCNAB-related
High	Obbri1_510860	14	6	15	6	57.5		0.091148	1.25213	1.74344	2.95777	4.39998	NO	Glycosyl transferase, family 8
High	Obbri1_511960	10	3	15	1	40.8					6.41742		YES	Haem peroxidase, plant/fungal/bacterial; Fungal lignin peroxidase; Haem peroxidase
High	Obbri1_536803	9	2	8	2	49.3	1.16967	1.75909	1.64356	2.28384	5.13219	4.06157	NO	FAD-dependent pyridine nucleotide-disulphide oxidoreductase
High	Obbri1_548881	32	5	26	5	17.4	5.11815	8.31674	4.38258	6.52088	2.44622	5.46504	NO	Ribosomal protein L25/L23; Ribosomal protein L23/L25, N-terminal; Ribosomal protein L23, conserved site; Ribosomal protein L23/L15e, core
High	Obbri1_552693	43	15	218	15	46.6	99.7586	84.2522	44.1389	49.2688	32.1941	50.1574	NO	Aminotransferase, class V/Cysteine desulphurase; Pyridoxal phosphate-dependent transferase, major region
High	Obbri1_562372	9	2	6	2	43		1.14066	0.376846	4.02985	1.18988	7.42116	YES	Chloroperoxidase
High	Obbri1_562998	18	4	11	4	28.9	1.433	0.505869	1.8251	2.03563	2.60275	2.79594	NO	Protein of unknown function DUF500
High	Obbri1_568223	7	3	36	3	68.2	4.1617	4.01997	6.63864	4.96529	15.3816	6.31922	YES	Peptidase S53, propeptide; Peptidase S8 and S53, subtilisin, kexin, sedolisin; Proteinase inhibitor, propeptide
High	Obbri1_586678	65	9	103	9	23	9.70306	11.3309	20.4484	16.7727	9.60138	18.5486	NO
High	Obbri1_588313	4	3	11	3	103.8	0.497074	0.832099	0.570828	1.24169	1.55644	2.45036	NO	HEAT; N-6 adenine-specific DNA methylase, conserved site; Armadillo-type fold
High	Obbri1_590125	41	14	71	13	55.2	10.5571	9.05391	16.1878	9.08962	2.75373	2.46639	NO	Cytochrome b5; FMN-dependent alpha-hydroxy acid dehydrogenase; FMN-dependent alpha-hydroxy acid dehydrogenase, active site
High	Obbri1_597742	16	5	17	5	60.6	0.829356	0.751254	1.53807	2.17277	4.27351	2.40437	YES	Glycoside hydrolase, family 20; Glycoside hydrolase, family 20, catalytic core; Beta-N-acetylhexosaminidase-like; Glycoside hydrolase, catalytic core
High	Obbri1_60598	8	6	9	5	104	0.642183	0.38987	0.951085	0.726187	1.77236	1.27374	NO	Amidohydrolase 3; Duplicated hybrid motif; Metal-dependent hydrolase, composite
High	Obbri1_607139	5	2	14	2	54.7	3.80703	2.68018	2.25001	4.33184	3.29723	3.78574	NO	Adenylate cyclase-associated CAP, N-terminal; Adenylate cyclase-associated CAP, C-terminal; CARP motif; Adenylate cyclase-associated CAP
High	Obbri1_619030	30	3	33	3	16	15.6269	21.6179	7.7166	10.0594	8.64307	9.68471	NO	Ribosomal protein S11
High	Obbri1_627233	27	17	116	13	101.7	16.0407	13.0497	10.6969	8.54668	30.0711	14.745	YES	Glycoside hydrolase, family 3, N-terminal; Glycoside hydrolase, family 3, C-terminal; Glycoside hydrolase, catalytic core
High	Obbri1_627302	13	7	40	3	67.6	2.31002	2.55154	1.29122	1.20701	2.36744	1.0587	NO	Glycoside hydrolase, family 3, N-terminal; Glycoside hydrolase, family 3, C-terminal; Glycoside hydrolase, catalytic core
High	Obbri1_639237	80	30	619	11	54	159.207	157.282	184.233	277.693	191.265	392.868	NO	Aldehyde dehydrogenase; Aldehyde dehydrogenase, conserved site; Cytochrome P450; Aldehyde/histidinol dehydrogenase
High	Obbri1_640529	12	5	32	1	42.9							NO	Aldo/keto reductase
High	Obbri1_641261	13	4	207	4	47.5	227.152	201.531	70.5544	65.9338	91.9059	47.3532	YES	Cellulose-binding region, fungal; Glycoside hydrolase, family 5; Glycoside hydrolase, catalytic core
High	Obbri1_652616	11	4	8	4	42.2	0.157779		1.25229	1.71927	1.63077	2.67714	NO	Isopenicillin N synthase; 2OG-Fe(II) oxygenase
High	Obbri1_658759	21	5	168	5	43.5	216.118	263.507	283.13	328.829	239.011	247.506	YES	Peptidase A1; Peptidase aspartic, active site; Peptidase aspartic, catalytic
High	Obbri1_664751	13	7	56	7	82.1	18.2609	23.7962	6.07763	5.77513	9.64883	3.41837	YES	Glucose-methanol-choline oxidoreductase, C-terminal; FAD-dependent pyridine nucleotide-disulphide oxidoreductase; Glucose-methanol-choline oxidoreductase, N-terminal; Carbohydrate-binding family 9/cellobiose dehydrogenase, cytochrome
High	Obbri1_698606	2	2	30	2	83.3	42.4785	1.08351	43.611	1.38877	75.1271	2.08415	NO
High	Obbri1_718064	40	11	64	11	42.4	3.73364	4.90284	6.30576	11.4772	8.53835	13.2711	NO	Cell division/GTP binding protein; Septin
High	Obbri1_718935	11	4	15	4	50.5	1.72825	1.27528	1.87823	1.74634	2.84121	3.23972	NO	D-isomer specific 2-hydroxyacid dehydrogenase, catalytic region; D-isomer specific 2-hydroxyacid dehydrogenase, NAD-binding; NAD(P)-binding
High	Obbri1_719152	6	4	29	4	82.6	7.346	9.12136	5.43017	7.92752	10.5227	10.355	YES	Polysaccharide lyase family 8, central; Chondroitin AC/alginate lyase; Polysaccharide lyase family 8-like, C-terminal; Glycoside hydrolase-type carbohydrate-binding
High	Obbri1_719566	14	6	95	6	66	17.5698	15.3587	46.1983	44.7189	53.2017	46.866	YES	Peptidase S53, propeptide; Peptidase S8 and S53, subtilisin, kexin, sedolisin; Proteinase inhibitor, propeptide
High	Obbri1_719745	7	7	14	7	108.4	2.51269	4.79734	2.24929	3.71531	6.97745	3.68528	NO
High	Obbri1_719765	19	6	110	6	49.9	34.1329	37.003	16.7781	16.8941	22.1665	15.8889	YES	Glycoside hydrolase, family 5; Thymidylate kinase; Glycoside hydrolase, catalytic core
High	Obbri1_719781	6	5	11	5	106.1	0.715812	1.01649	0.938937	3.36759	1.75433	6.99007	NO	Clathrin/coatomer adaptor, adaptin-like, N-terminal; Coatomer, beta subunit, C-terminal; Coatomer, beta subunit; Armadillo-type fold
High	Obbri1_719985	16	4	18	4	40.2	3.86465	0.951951	4.06528	1.24339	4.10245	1.57519	YES	Mov34-1; Mov34/MPN/PAD-1
High	Obbri1_719994	48	12	73	9	36.9	4.32703	5.206	14.5782	26.438	18.1398	28.855	NO	Alcohol dehydrogenase, zinc-binding; Alcohol dehydrogenase GroES-like; GroES-like; NAD(P)-binding
High	Obbri1_720399	67	8	59	8	16.6	10.7723	6.37361	6.18335	2.29989	15.4678	5.10627	NO	Nucleoside diphosphate kinase, core
High	Obbri1_721021	54	17	182	17	44.7	16.8904	13.2503	29.1178	23.6293	36.8653	41.9436	NO	Phosphoglycerate kinase; Phosphoglycerate kinase, conserved site
High	Obbri1_721099	8	5	18	5	97.5	0.972499	4.14151	0.987014	5.64008	1.58482	6.29139	NO	AAA ATPase, core; ATP-binding region, ATPase-like; AAA+ ATPase, core; 26S proteasome subunit P45; AAA ATPase, conserved site
High	Obbri1_721134	5	3	7	3	65.9	2.51602	2.7539	1.26822	2.79451	0.652881	1.43528	NO	Gamma-glutamyltranspeptidase
High	Obbri1_721441	19	6	12	5	56.2	0.0776503	0.275876	0.647201	1.62524	2.60218	10.9194	NO	Coenzyme A transferase; 3-oxoacid CoA-transferase; 3-oxoacid CoA-transferase, subunit B; 3-oxoacid CoA-transferase, subunit A
High	Obbri1_721498	43	16	109	15	56.7	19.248	11.6256	21.6775	8.77171	20.7611	8.25026	NO	Coenzyme A transferase; 3-oxoacid CoA-transferase; 3-oxoacid CoA-transferase, subunit B; 3-oxoacid CoA-transferase, subunit A; Coenzyme A transferase active site
High	Obbri1_721596	19	5	12	5	44.7	0.974275	0.257331	0.889431	1.35916	1.01748	2.94244	NO	Phosphoserine aminotransferase; Aminotransferase, class V/Cysteine desulphurase; Pyridoxal phosphate-dependent transferase, major region
High	Obbri1_721831	11	3	47	1	43.3	1.64021	2.44657	0.931258	2.13634	2.95336	2.24185	NO
High	Obbri1_722283	15	7	19	7	56.6	1.96832	2.40157	1.28565	3.04856	2.53245	4.68268	NO	Proteasome component region PCI
High	Obbri1_722898	24	11	33	11	58.4	1.34869	1.84985	1.76001	3.4483	7.88854	5.05716	NO	Glycosyl transferase, family 20; Alpha,alpha-trehalose-phosphate synthase
High	Obbri1_723211	11	3	18	3	36.6	5.64133	4.77113	1.87574	1.26485	4.04555	2.10956	YES	Glycosyl hydrolase 53; Glycoside hydrolase, catalytic core
High	Obbri1_724015	21	5	144	5	33.4	106.636	114.315	49.5582	51.0978	31.9176	31.1315	YES	Lipase, GDSL; Esterase, SGNH hydrolase-type
High	Obbri1_724981	21	11	24	11	68.7	1.54395	2.63818	1.86041	4.16019	5.78984	4.576	NO	RNA recognition motif, RNP-1; Polyadenylate-binding protein/Hyperplastic disc protein; RNA recognition, region 1; Polyadenylate binding protein, human types 1, 2, 3, 4
High	Obbri1_725097	55	12	105	12	37	12.1978	11.3772	13.4053	16.8536	22.2897	26.9594	NO	Alcohol dehydrogenase, zinc-binding; Alcohol dehydrogenase GroES-like; GroES-like; NAD(P)-binding
High	Obbri1_725247	11	5	8	5	63.8	0.814855	0.568179	0.368695	0.96048	1.66369	1.60281	NO	Hydantoinase B/oxoprolinase
High	Obbri1_725317	7	3	6	3	60.6	2.31533	4.12229	0.173628		0.264567		YES	Glycoside hydrolase, carbohydrate-binding; Glycoside hydrolase family 13; Glycosyl hydrolase, family 13, catalytic region; Alpha-amylase, C-terminal all beta; Glycosyl hydrolase, family 13, subfamily, catalytic region; WD40 repeat; Carbohydrate-binding-like fold; Glycoside hydrolase, catalytic core
High	Obbri1_725405	30	7	35	7	38.2	2.94476	5.07936	3.91476	6.33673	2.60475	6.52862	NO	Intradiol ring-cleavage dioxygenase, C-terminal; Catechol dioxygenase, N-terminal; Intradiol ring-cleavage dioxygenase, core
High	Obbri1_725604	37	6	26	6	18.5	3.97033	4.58315	3.64742	6.92425	1.78614	5.66829	NO	Glutathione peroxidase; DNA topoisomerase, type IIA, subunit B or N-terminal; Thioredoxin-like fold
High	Obbri1_725777	66	20	251	20	37.3	32.3607	29.2387	40.125	51.8075	52.3199	78.3004	NO	Alcohol dehydrogenase, zinc-binding; Alcohol dehydrogenase GroES-like; GroES-like; NAD(P)-binding
High	Obbri1_726082	20	2	19	2	26.6	1.97398	2.89372	0.949526	3.21545	3.95242	1.76701	YES	Glycoside hydrolase, family 12; Concanavalin A-like lectin/glucanase
High	Obbri1_726091	19	9	22	6	60	10.7142	5.67914	2.25685	1.19848	4.96423	0.961125	YES	Carboxylesterase, type B
High	Obbri1_726466	14	9	30	9	112.6	1.93517	1.29088	1.39438	1.60001	4.03737	3.69832	YES	Dehydrogenase, E1 component; Transketolase, central region; 2-oxoglutarate dehydrogenase, E1 component
High	Obbri1_726547	19	14	71	14	109.9	13.8502	13.4009	7.72572	6.41235	16.7223	12.1115	NO
High	Obbri1_726690	13	5	41	3	55.4	6.90331	3.19205	2.46924	1.88199	5.7851	3.80635	NO	Carboxylesterase, type B
High	Obbri1_726735	8	3	8	3	58.8		0.672527	5.73654	4.25598	5.5133	7.27617	YES	Carboxylesterase, type B
High	Obbri1_727100	50	9	43	7	39.5	33.2909	20.2275	2.5993	1.33559	0.94179		YES	Haem peroxidase, plant/fungal/bacterial; Fungal lignin peroxidase; Haem peroxidase
High	Obbri1_727418	59	21	234	18	49.4	15.3624	18.4028	36.6879	37.0618	44.5439	46.4851	NO	Tubulin; Alpha tubulin; Tubulin/FtsZ, GTPase; Tubulin/FtsZ, C-terminal
High	Obbri1_727470	35	13	51	13	53.1	10.1624	7.14433	9.05975	8.22702	14.352	9.09785	NO	Crotonase, core
High	Obbri1_727792	11	2	5	1	37.8		0.678041		2.6151			NO	Alpha/beta hydrolase fold-3; Phosphopantetheine attachment site
High	Obbri1_727972	63	11	62	11	20.5	7.67204	6.53415	12.6051	13.9996	4.92667	8.55397	NO	Thioredoxin-like; Alkyl hydroperoxide reductase/ Thiol specific antioxidant/ Mal allergen; Thioredoxin-like fold
High	Obbri1_728166	72	9	165	9	18.1	62.1456	57.7932	62.482	79.7038	77.2383	96.3244	NO	Redoxin; Thioredoxin-like fold
High	Obbri1_729042	12	5	80	1	44.1							NO	Aldo/keto reductase
High	Obbri1_729269	25	8	15	8	44.9	0.663534	5.84653	1.25112	5.93532	2.9514	8.40296	NO	Protein kinase, core; Serine/threonine protein kinase-related; Tyrosine protein kinase; Serine/threonine protein kinase; Protein kinase ATP binding, conserved site; Serine/threonine protein kinase, active site; Protein kinase-like
High	Obbri1_729286	43	16	87	16	50.3	7.65443	5.53068	6.5266	7.62694	14.7323	15.935	NO	Isocitrate/isopropylmalate dehydrogenase; Isocitrate dehydrogenase NADP-dependent, eukaryotic
High	Obbri1_729358	16	3	6	3	33.7	0.737961	0.276906	2.34124	0.643129	3.43667	0.797038	NO	Purine phosphorylase, family 2; Inosine guanosine and xanthosine phosphorylase
High	Obbri1_729799	11	6	19	5	87.4	1.20549	1.48369	1.1648	1.81094	2.35035	3.06965	NO	Cullin, N-terminal region; Cullin homology; Cullin, conserved site; Cullin repeat-like
High	Obbri1_729866	11	5	27	5	58	1.09149	2.38103	2.35538	4.70207	2.90485	3.70004	NO	Cdc37, N-terminal; Cdc37, C-terminal; Cdc37, Hsp90 binding
High	Obbri1_730187	19	6	27	4	49.9	3.35398	3.08474	3.16761	1.43788	5.33568	1.57164	NO	1-aminocyclopropane-1-carboxylate synthase; Aminotransferase, class I and II; Aminotransferases, class-I, pyridoxal-phosphate-binding site; Pyridoxal phosphate-dependent transferase, major region
High	Obbri1_730299	22	6	21	6	42.7	7.38344	4.79288	3.71243	3.22986	5.40181	4.04482	YES	Oxidoreductase, N-terminal; Oxidoreductase, C-terminal; NAD(P)-binding
High	Obbri1_730523	32	9	61	9	39.4	3.65886	5.34335	4.23602	7.10834	8.88114	12.9283	NO	Heat shock protein Hsp70; Heat shock protein 70
High	Obbri1_730732	34	6	31	6	32.4	3.75231	2.57481	5.17041	5.70778	11.0807	8.65698	NO	Haloacid dehalogenase-like hydrolase; 2-phosphoglycolate phosphatase, eukaryotic; HAD-superfamily hydrolase, subfamily IIA
High	Obbri1_731090	64	27	299	27	63.2	33.349	20.3785	33.3651	39.1603	37.9399	52.7105	NO	Phosphoenolpyruvate carboxykinase, N-terminal; Phosphoenolpyruvate carboxykinase, ATP-utilising; Phosphoenolpyruvate carboxykinase (ATP), conserved site
High	Obbri1_731121	21	5	119	5	54.2	65.4236	100.621	24.6514	33.1487	11.8481	11.0538	YES	Cellulose-binding region, fungal; Glycoside hydrolase, family 7; Concanavalin A-like lectin/glucanase
High	Obbri1_731281	26	9	48	9	59.7	4.15225	3.65411	4.19137	3.68337	15.5995	5.79317	NO	Glycoside hydrolase, family 1; Glycoside hydrolase, catalytic core
High	Obbri1_731963	79	28	561	10	53.7	72.1335	55.9459	49.0322	39.2444	60.6161	62.5186	NO	Aldehyde dehydrogenase; Aldehyde dehydrogenase, conserved site; Cytochrome P450; Aldehyde/histidinol dehydrogenase
High	Obbri1_732084	71	27	394	27	47.4	64.2611	73.4317	65.476	97.3892	129.259	208.033	NO	Enolase
High	Obbri1_732619	20	6	15	6	44.8	0.989671	1.32383	1.08761	1.92813	3.01213	2.94281	NO	Mannose-6-phosphate isomerase, type I; Mannose-6-phosphate isomerase; Cupin, RmlC-type
High	Obbri1_733008	29	10	84	10	50.1	2.57812	8.17955	7.74272	17.915	17.9998	21.8338	NO	Peptidase M28; Fibronectin, type III; Fibronectin, type III-like fold
High	Obbri1_733483	18	2	6	2	15	1.1941	22.6736	2.62127	13.4616	1.30347	13.8475	NO	High mobility group box, HMG1/HMG2, subgroup; High mobility group box, HMG1/HMG2; High mobility group box, HMG
High	Obbri1_733785	52	18	132	18	42.6	15.9653	14.9639	42.7741	35.0681	62.1025	40.7007	NO	S-adenosylmethionine synthetase
High	Obbri1_733902	29	5	20	5	34	1.37976	1.10879	1.29039	1.06207	0.868855	1.58946	NO	Molybdopterin binding
High	Obbri1_734272	65	20	353	20	37.7	62.6033	40.7131	81.5722	96.7209	116.867	146.307	NO	NAD-dependent epimerase/dehydratase; N-6 adenine-specific DNA methylase, conserved site; NAD(P)-binding
High	Obbri1_734455	9	2	5	2	43.9			0.47421	1.18597	2.68324	2.39511	NO	Alpha/beta hydrolase fold-3
High	Obbri1_734463	41	10	149	10	36	31.9443	29.8257	29.7887	34.7744	25.088	25.8463	NO	Intradiol ring-cleavage dioxygenase, C-terminal; Catechol dioxygenase, N-terminal; Intradiol ring-cleavage dioxygenase, core
High	Obbri1_734695	27	7	22	7	39.4	1.94335	2.60665	4.55613	3.42301	1.92915	1.52309	NO	RNA recognition motif, RNP-1
High	Obbri1_734905	2	2	8	2	133.4	5.83824	10.352	4.22103	11.4149	6.02541	15.7965	NO	Ubiquitin; Peptidase C19, ubiquitin carboxyl-terminal hydrolase 2
High	Obbri1_734984	9	4	7	4	68.4	1.06897	1.71417	1.18333	2.65944	1.25178	3.07894	NO	Peptidase M24, catalytic core
High	Obbri1_735392	11	3	11	3	49.6	1.90098	1.69099	2.10932	1.55165	3.26265	1.28569	NO	Histidine acid phosphatase; Histidine acid phosphatase, eukaryotic
High	Obbri1_735483	37	9	137	9	32	52.4246	54.8076	36.1039	46.3907	38.3234	46.1414	NO	Ribosomal protein S2; Ribosomal protein S2, eukaryotic/archaeal
High	Obbri1_735656	17	10	17	10	83	0.656623	0.833174	0.649397	2.62644	1.64915	3.86292	NO	Glycogen synthase; Peptidase aspartic, active site
High	Obbri1_735931	74	11	89	11	22.7	12.7864	10.9549	31.3792	36.8842	22.6714	28.0919	NO	Nitroreductase
High	Obbri1_736164	62	14	158	14	27	22.9593	29.6671	28.1072	34.9885	26.4897	37.3197	NO	Beta-lactamase-like; Hydroxyacylglutathione hydrolase
High	Obbri1_736445	5	4	17	4	107.4	2.89185	3.05112	0.86286	1.14452	2.30245	1.67858	YES	Glycoside hydrolase, family 31; Aldehyde dehydrogenase, conserved site; Glycoside hydrolase, catalytic core; Lactate dehydrogenase/glycoside hydrolase, family 4, C-terminal
High	Obbri1_736703	10	3	18	3	52.9	17.6444	18.054	3.95464	1.85568	5.15294	3.33094	YES	Peptidase S10, serine carboxypeptidase
High	Obbri1_736978	61	17	276	17	39.6	51.2139	57.8522	49.4787	97.0947	61.61	99.6976	NO	Ketose-bisphosphate aldolase, class-II; Fructose-bisphosphate aldolase, class II, yeast/E. coli subtype
High	Obbri1_737017	12	5	8	5	65.7	3.81863	0.768964	3.88514	1.35206	3.38183	3.14091	NO	Peptidase M20; Peptidase M20, dimerisation; Peptidase M20, carboxypeptidase S
High	Obbri1_737274	8	2	25	2	31.6	62.2132	80.7405	7.85706	7.67772	5.71706	6.35216	YES	Lipase, class 3; Lipase, active site
High	Obbri1_737361	17	5	24	5	51	2.8392	4.44223	6.35436	10.0648	7.74363	11.1243	YES	Peptidase M28
High	Obbri1_737655	36	7	55	6	24.8	6.40089	9.16368	17.9123	20.9507	21.3344	30.432	NO	Manganese and iron superoxide dismutase
High	Obbri1_737766	7	3	12	3	80.9	16.1665	19.4009	3.00139	3.50994	1.75243	2.1824	YES	Hydroxymethylglutaryl-CoA reductase, class I/II, catalytic; Pectin lyase fold/virulence factor
High	Obbri1_738687	21	6	20	4	29.4	2.67798	2.84994	2.39522	4.75785	2.06262	3.893	NO	Glutathione S-transferase, omega-class; Glutathione S-transferase, N-terminal; Glutathione S-transferase, C-terminal-like; Thioredoxin-like fold
High	Obbri1_738704	50	15	131	15	37.2	10.2704	9.89436	19.5041	21.8908	25.2479	28.8853	NO	Uricase
High	Obbri1_738906	67	22	236	22	40.8	47.9317	32.2639	23.4003	26.5771	25.8164	20.1617	NO	NADH:flavin oxidoreductase/NADH oxidase, N-terminal
High	Obbri1_738921	40	10	108	10	32.7	22.7608	17.478	60.9106	48.113	58.9069	51.681	NO	Aldo/keto reductase
High	Obbri1_739044	14	3	70	3	42.1	20.5758	25.2082	9.55687	18.1396	57.0769	18.1238	YES	Peptidase A1; Peptidase aspartic, active site; Peptidase aspartic, catalytic
High	Obbri1_739625	63	14	92	14	37.1	12.781	12.6039	20.022	21.4194	13.7637	19.6784	NO	Tetrapyrrole biosynthesis, hydroxymethylbilane synthase
High	Obbri1_739740	15	3	19	3	36.2	1.91095	1.63421	4.70191	3.30512	2.85156	2.32696	NO	von Willebrand factor, type A; Ubiquitin interacting motif
High	Obbri1_740755	64	18	285	16	42.2	51.4462	59.854	72.5423	101.38	97.881	124.723	NO	Aldo/keto reductase
High	Obbri1_741254	10	4	6	4	57.1	3.01987	0.136304	1.68002	0.258041	2.18403	0.716463	NO	UDP-glucuronosyl/UDP-glucosyltransferase; ADP-glucose pyrophosphorylase, conserved site
High	Obbri1_741912	13	5	14	5	51.1	1.15196	2.13605	1.85409	2.58178	2.77607	5.49297	NO	Peptidase S10, serine carboxypeptidase
High	Obbri1_742130	7	3	17	3	57.3	8.68037	2.02905	2.83398	2.89029	15.4132	2.58281	YES	Peptidase S28
High	Obbri1_742275	16	7	21	7	60.6	2.93535	1.84065	2.09051	3.02804	5.37284	5.73293	NO	Isocitrate lyase and phosphorylmutase, core; Isocitrate lyase and phosphorylmutase; Isocitrate lyase; Pyruvate/Phosphoenolpyruvate kinase, catalytic core
High	Obbri1_742665	45	20	89	11	56.7	6.86263	7.97202	7.95845	15.6725	18.3198	25.1583	NO	UTP--glucose-1-phosphate uridylyltransferase; UTP--glucose-1-phosphate uridylyltransferase, subgroup
High	Obbri1_743022	55	40	266	40	93.6	20.1927	17.0022	19.8967	24.5541	37.873	41.4192	NO	Protein synthesis factor, GTP-binding; Translation elongation factor EFG/EF2, C-terminal; Translation elongation factor EFTu/EF1A, domain 2; Translation elongation factor EFG/EF2, domain IV; Small GTP-binding protein; Translation elongation and initiation factors/Ribosomal, beta-barrel; Elongation factor G, III and V
High	Obbri1_743296	33	12	51	12	53.7	6.70571	7.4916	4.9576	5.03565	11.9465	9.64012	NO	Fumarate lyase; Fumarate hydratase, class II; L-Aspartase-like
High	Obbri1_743565	3	2	17	2	83.1	5.37773	10.4925	7.10415	10.4724	6.9875	9.18261	YES	Glycolipid anchored surface protein GAS1; X8; Glycoside hydrolase, family 5; Glycoside hydrolase, catalytic core
High	Obbri1_743703	6	2	4	2	58.6	0.428942	0.749163	0.619984	2.14071	1.97648	2.80416	NO	Regulator of chromosome condensation, RCC1; Zinc finger, PHD-type; Regulator of chromosome condensation/beta-lactamase-inhibitor protein II; Zinc finger, FYVE/PHD-type
High	Obbri1_743860	34	14	42	14	64.7	1.80379	6.56023	1.41515	8.07119	2.31052	13.013	NO	AICARFT/IMPCHase bienzyme, formylation region; MGS-like; AICARFT/IMPCHase bienzyme
High	Obbri1_744058	26	7	20	7	33.4	1.01396	1.5722	0.4838	0.602318	9.73088	5.00812	NO	Mitochondrial carrier protein; Adenine nucleotide translocator 1; Mitochondrial substrate carrier
High	Obbri1_744234	11	2	10	2	23.9	9.67103	0.717686	2.12636	0.94257	7.23669	1.30499	NO	Ribosomal protein L15e; Ribosomal protein L23/L15e, core
High	Obbri1_744255	13	5	18	5	61.8	1.45771	1.02922	2.19857	2.14368	2.11881	2.60313	NO	Amidase signature enzyme; Amidase, fungi type
High	Obbri1_744437	12	2	12	2	20.9	5.8156	7.61447	6.10537	7.45412	5.78191	6.78724	NO	Ribosomal protein L18e
High	Obbri1_744736	5	3	10	3	101.8	0.916517	0.533393	0.617193	1.63808	1.78943	2.87275	NO	Clathrin/coatomer adaptor, adaptin-like, N-terminal; Coatomer, gamma subunit , appendage; Coatomer, gamma subunit; Carbohydrate kinase, FGGY; Armadillo-type fold; Clathrin/coatomer adaptor, adaptin-like, appendage, Ig-like subdomain; Clathrin/coatomer adaptor, adaptin-like, appendage, C-terminal subdomain
High	Obbri1_744782	17	4	19	1	36.5	0.201587	1.34214	0.511294	0.789744			NO	Alcohol dehydrogenase, zinc-binding; Alcohol dehydrogenase GroES-like; GroES-like; NAD(P)-binding
High	Obbri1_745363	8	3	9	3	56.4	1.09292		0.919359	0.364274	2.02881	0.863384	NO	Anthranilate synthase component I and chorismate binding protein; Chorismate binding, C-terminal; Anthranilate synthase component I, N-terminal; Anthranilate synthase component I
High	Obbri1_745371	40	21	163	20	67.1	14.2172	6.13178	9.38724	8.26201	11.0465	8.8374	NO	Heat shock protein 70; Heat shock protein Hsp70
High	Obbri1_745439	11	4	8	4	60.1	0.051732		0.276889	0.264723	2.67572	2.81522	NO	Pyridoxal phosphate-dependent decarboxylase; Glutamate decarboxylase; Pyridoxal phosphate-dependent transferase, major region
High	Obbri1_745538	36	12	69	12	42.9	8.50666	6.48976	9.30699	8.93555	17.4261	15.5499	NO	Peptidase M24, catalytic core; Proliferation-associated protein 1; Calcium-binding EF-hand
High	Obbri1_745705	10	3	13	3	38.6	1.36731	0.8819	1.48085	1.93844	2.64979	2.50816	NO	WD40 repeat; WD40 repeat-like
High	Obbri1_745903	14	7	15	7	68	0.357831	0.906517	0.839953	2.56589	2.3998	4.2228	NO	ATPase, F1/V1/A1 complex, alpha/beta subunit, nucleotide-binding; ATPase, F1/V1/A1 complex, alpha/beta subunit, C-terminal; ATPase, F1/V1/A1 complex, alpha/beta subunit, N-terminal; ATPase, V1 complex, subunit A
High	Obbri1_746815	61	13	127	13	31.1	13.7817	6.63826	25.5061	15.4647	26.0181	14.9821	NO
High	Obbri1_748033	55	16	227	16	40.5	28.4923	27.7277	45.6247	66.2862	79.1657	128.232	NO	Isocitrate/isopropylmalate dehydrogenase; 3-isopropylmalate dehydrogenase
High	Obbri1_748223	9	9	21	9	134.2	0.976726	1.29978	0.945445	2.85157	2.08672	5.34512	NO	HEAT; TATA-binding protein interacting (TIP20); Armadillo-type fold
High	Obbri1_748241	4	2	9	2	62.6	3.75327	0.744356	6.16352	1.44285	9.54554	2.0212	NO	Amidase signature enzyme; Amidase, fungi type
High	Obbri1_748271	27	5	39	5	23.4	8.5076	12.3068	7.92706	10.5514	8.24235	7.48908	NO	Ran Binding Protein 1
High	Obbri1_748380	57	18	236	18	44.8	24.8915	23.4741	31.6728	30.3021	50.6759	40.1469	YES	Peptidase A1; Peptidase aspartic, active site; Peptidase aspartic, catalytic
High	Obbri1_748445	20	5	23	5	40.4	1.34015	0.429821	3.17343	2.56192	8.01336	4.79288	NO	Isocitrate/isopropylmalate dehydrogenase; Isocitrate dehydrogenase NAD-dependent, mitochondrial
High	Obbri1_748506	57	15	144	15	40.6	12.2308	16.7205	9.14901	21.7037	14.1653	18.7248	YES	Thioredoxin-related; Thioredoxin domain; Endoplasmic reticulum, protein ERp29, C-terminal; Disulphide isomerase; Thioredoxin-like fold
High	Obbri1_748826	57	22	167	22	58	15.0346	5.764	24.1937	12.6579	37.2692	19.9816	YES	ATPase, F1/V1/A1 complex, alpha/beta subunit, nucleotide-binding; ATPase, F1/V1/A1 complex, alpha/beta subunit, C-terminal; ATPase, F1/V1/A1 complex, alpha/beta subunit, N-terminal; AAA+ ATPase, core; ATPase, F1 complex, beta subunit
High	Obbri1_748932	42	9	118	9	37.5	12.2872	12.621	18.9256	25.5183	22.5158	33.7368	NO	Alpha/beta hydrolase fold-1; Homoserine acetyltransferase
High	Obbri1_749216	16	5	23	5	49.9	3.41918	4.04855	1.39209	2.36063	2.8634	3.56125	NO	Aminotransferase class-III; Acetylornithine and succinylornithine aminotransferase; Pyridoxal phosphate-dependent transferase, major region
High	Obbri1_749477	11	5	57	5	51.7	12.0226	16.3434	9.28741	13.4167	12.7807	15.7771	YES	Peptidase S8 and S53, subtilisin, kexin, sedolisin; Proteinase inhibitor I9, subtilisin propeptide; Proteinase inhibitor, propeptide
High	Obbri1_749512	10	2	29	2	38.8	20.4565	22.6771	5.23932	1.51303	3.56145	0.893331	YES	Cellulose-binding region, fungal; Esterase, SGNH hydrolase-type
High	Obbri1_749606	17	3	17	3	28.9	3.17416	2.7125	2.61193	5.06356	5.51768	8.70936	NO	ARF/SAR superfamily; ADP-ribosylation factor; GTP-binding protein SAR1; Small GTP-binding protein
High	Obbri1_749949	18	6	107	6	37.7	18.6904	28.8779	19.1204	30.6319	44.2368	34.9534	NO
High	Obbri1_750250	39	10	86	8	32.9	36.2671	35.0364	22.4142	24.7703	19.5064	29.2483	NO	Dihydrodipicolinate synthetase
High	Obbri1_750926	40	13	70	13	49.1	4.6282	4.22037	8.19767	10.8492	15.9106	16.1019	NO	DNA/RNA helicase, DEAD/DEAH box type, N-terminal; DNA/RNA helicase, C-terminal; DEAD-like helicase, N-terminal; Helicase, superfamily 1 and 2, ATP-binding; RNA helicase, DEAD-box type, Q motif
High	Obbri1_751148	49	11	85	11	36.8	19.5846	10.9233	16.9906	10.7281	16.1635	7.71844	NO	Alcohol dehydrogenase, zinc-binding; Alcohol dehydrogenase GroES-like; Aldo/keto reductase; GroES-like; NAD(P)-binding
High	Obbri1_751693	35	8	71	8	28.8	16.5596	18.6253	13.0348	12.4178	9.16546	12.2438	NO	Ribosomal protein L30, core; Ribosomal protein L30, N-terminal; Ribosomal protein L7, eukaryotic; Ribosomal protein L30, C-terminal
High	Obbri1_751805	26	8	39	5	44.8	1.49399	5.59609	1.94623	12.2908	3.80675	20.302	NO	DNA/RNA helicase, DEAD/DEAH box type, N-terminal; DNA/RNA helicase, C-terminal; DEAD-like helicase, N-terminal; Helicase, superfamily 1 and 2, ATP-binding; RNA helicase, DEAD-box type, Q motif; RNA helicase, ATP-dependent, DEAD-box, conserved site
High	Obbri1_751998	54	14	71	14	36.2	5.14651	4.03187	7.20212	7.7549	11.7712	12.2632	NO	Type II secretion system protein E; Cell division/GTP binding protein; Septin
High	Obbri1_752125	20	6	18	6	48.2	0.928182	0.778943	1.54697	1.07307	2.18104	3.04726	NO	Protein kinase, core; JNK MAP kinase; Serine/threonine protein kinase-related; Tyrosine protein kinase; Serine/threonine protein kinase; Protein kinase ATP binding, conserved site; Serine/threonine protein kinase, active site; Protein kinase-like
High	Obbri1_752657	15	5	24	5	46.3	2.01919	2.45947	3.53663	4.84373	2.12779	5.02972	NO	SMP-30/Gluconolaconase/LRE-like region
High	Obbri1_752856	7	5	10	5	116.8	1.16517	0.274713	1.09605	0.190469	2.09217	0.290426	NO	Importin-beta, N-terminal; Armadillo-type fold
High	Obbri1_753037	47	13	107	13	29.8	13.0433	13.1685	9.70833	16.667	17.8213	22.6375	NO	Ribosomal protein S4e, N-terminal and RNA-binding; KOW; Ribosomal protein S4e, central; RNA-binding S4; Ribosomal protein S4e, N-terminal; Ribosomal protein S4e
High	Obbri1_753042	20	8	46	8	52	6.76767	3.93912	8.59727	3.93238	23.8193	8.59726	NO	Aminotransferase class-III; Pyridoxal phosphate-dependent transferase, major region
High	Obbri1_753306	11	2	5	2	45.8	0.520871	0.246735	0.857884	0.361564	2.50778	0.962856	NO	Amidohydrolase 2
High	Obbri1_753457	24	6	37	6	27.8	11.1318	11.4241	9.54562	9.24219	13.6757	15.4704	NO	Short-chain dehydrogenase/reductase SDR; Glucose/ribitol dehydrogenase; NAD(P)-binding
High	Obbri1_753490	20	6	33	6	40.4	6.42487	5.27125	5.02861	4.46995	4.82222	3.35296	NO	FAD dependent oxidoreductase
High	Obbri1_753702	35	4	25	4	15.6	7.9631	6.98255	4.67088	4.86183	7.60423	7.13902	NO	Ribosomal protein L27e
High	Obbri1_753712	12	2	7	2	32	0.748772	0.727498	0.853055	1.04316	3.52775	2.09061	NO	ATPase, F1 complex, gamma subunit
High	Obbri1_753808	39	11	24	11	43.4	1.09878	1.28019	2.6631	3.49356	4.44517	6.18723	NO	Phosphatidylserine decarboxylase-related; Phosphatidylserine decarboxylase
High	Obbri1_753990	29	19	173	19	97.8	22.6557	26.9955	14.4686	22.0817	21.5636	37.8872	YES	Glycoside hydrolase family 2, immunoglobulin-like beta-sandwich; Galactose-binding like; Glycoside hydrolase, catalytic core
High	Obbri1_754175	7	2	10	2	43.3	1.13153	0.867745	2.25844	1.83338	3.76344	3.45212	NO	Leucine-rich repeat; Leucine-rich repeat, ribonuclease inhibitor subtype
High	Obbri1_754440	36	8	46	8	26	20.7727	9.02883	16.6977	10.2529	18.5902	13.7838	NO	Peptidase T1A, proteasome beta-subunit; 20S proteasome, A and B subunits; Proteasome, beta-type subunit, conserved site
High	Obbri1_754645	45	10	43	10	29.2	4.58624	3.32543	5.98814	6.32054	12.371	7.00482	NO	Adenylate/cytidine kinase, N-terminal; Adenylate kinase; Adenylate kinase, zinc-finger lid region; Adenylate kinase, subfamily
High	Obbri1_755221	4	2	9	2	49.9	3.04472	3.71507	5.53643	5.49957	10.8442	9.33116	YES	Aromatic-ring hydroxylase; FAD dependent oxidoreductase
High	Obbri1_755324	10	2	14	2	27.4	6.01642	5.46849	5.94556	7.766	7.78677	11.6345	NO	Short-chain dehydrogenase/reductase SDR; Glucose/ribitol dehydrogenase; NAD(P)-binding
High	Obbri1_755667	32	8	28	8	35.4	1.29863	1.52133	9.30388	6.94761	11.7365	7.40169	NO	Polysaccharide deacetylase; Glycoside hydrolase/deacetylase, beta/alpha-barrel
High	Obbri1_756243	14	7	19	7	77.1	1.77148	1.57932	2.22342	2.57547	3.48837	6.59403	NO	Glutamine amidotransferase, class-II; Sugar isomerase (SIS); Glucosamine-fructose-6-phosphate aminotransferase, isomerising
High	Obbri1_756596	29	5	11	5	37.7	0.500624	0.219391	1.56132	1.2448	5.02132	2.71708	NO
High	Obbri1_756806	10	3	5	3	56.6	0.888733		1.98337	0.0906872	2.37381		NO	WD40 repeat; Region of unknown function DUF1899; Region of unknown function DUF1900; WD40 repeat-like
High	Obbri1_757324	55	31	262	29	74.4	16.3758	23.4813	13.8694	20.3844	17.2966	19.8445	YES	Heat shock protein 70; Heat shock protein Hsp70; Endoplasmic reticulum, targeting sequence
High	Obbri1_757363	30	6	21	4	32.5	0.0642236	0.0970018	1.51921	2.24115	1.66641	4.5302	NO
High	Obbri1_757417	4	3	7	3	101.7	1.27691	0.488585	2.23174	1.09581	4.97441	2.38197	NO	Amidohydrolase 1; Metal-dependent hydrolase, composite
High	Obbri1_757480	7	2	9	2	31.1	1.1812	0.688069	0.512891	0.663201	2.10606	1.04397	NO	Glucose/ribitol dehydrogenase; Short-chain dehydrogenase/reductase SDR; NAD(P)-binding
High	Obbri1_757873	13	4	10	4	54.4	1.37624	1.0696	1.99846	2.55159	4.04258	3.76516	NO	WD40 repeat; U box; Pre-mRNA-splicing factor 19; WD40 repeat-like
High	Obbri1_757983	20	4	6	4	31.1			0.512545	0.614829	2.21517	2.87251	NO	Short-chain dehydrogenase/reductase SDR; Glucose/ribitol dehydrogenase; NAD(P)-binding
High	Obbri1_758180	50	16	165	16	28.9	45.743	26.3818	22.8975	16.1064	12.0363	14.0091	NO	Glutathione S-transferase, N-terminal; Glutathione S-transferase, C-terminal-like; Thioredoxin-like fold
High	Obbri1_758344	11	4	7	4	50.1	0.327696				3.75165		NO	FAD linked oxidase, N-terminal; Berberine/berberine-like; FAD-binding, type 2
High	Obbri1_758544	2	2	15	2	122.9	98.2539	35.7888	88.429	154.067	100.529	48.7252	NO	ATPase, P-type, K/Mg/Cd/Cu/Zn/Na/Ca/Na/H-transporter; ATPase, P-type cation exchange, alpha subunit; E1-E2 ATPase-associated region; ATPase, P-type cation-transporter, C-terminal; ATPase, P-type cation-transporter, N-terminal; Haloacid dehalogenase-like hydrolase
High	Obbri1_759011	29	4	22	4	21.7	3.48624	2.86509	2.98518	5.06755	4.15094	8.42687	NO	Ras GTPase; Ras; Ras small GTPase, Ras type; Ras small GTPase, Rho type; Ras small GTPase, Rab type; Small GTP-binding protein
High	Obbri1_759364	26	5	9	5	43.1			0.11031		1.98338	0.240411	NO	Peptidase M16, N-terminal; Peptidase M16, C-terminal; Metalloenzyme, LuxS/M16 peptidase-like, metal-binding
High	Obbri1_759938	27	11	75	11	56.8	7.05592	8.34058	7.86461	9.91451	10.3629	9.89971	NO	Peptidase C1B, bleomycin hydrolase; Peptidase, cysteine peptidase active site
High	Obbri1_760087	23	4	19	4	26.1	2.3765	2.65926	2.27154	2.6051	2.95502	4.45737	NO	Haloacid dehydrogenase/epoxide hydrolase; Haloacid dehalogenase-like hydrolase; Haloacid dehalogenase, type II; HAD-superfamily hydrolase, subfamily IA, variant 2
High	Obbri1_760258	82	21	263	21	35.5	56.2938	39.9414	29.6982	41.5314	74.5654	58.2841	NO	Lactate/malate dehydrogenase; L-lactate/malate dehydrogenase; Malate dehydrogenase, NAD-dependent, eukaryotes and gamma proteobacteria; Malate dehydrogenase, active site; NAD(P)-binding; Lactate dehydrogenase/glycoside hydrolase, family 4, C-terminal
High	Obbri1_760626	6	2	5	2	59.9	3.11042	2.47975	0.831677	0.41684	1.85857		NO	Alpha-L-arabinofuranosidase, C-terminal; Glycoside hydrolase, catalytic core
High	Obbri1_761140	2	4	8	4	236.3	0.450057	2.71892	0.732275	5.68774	4.66014	2.19762	NO	FAD-dependent pyridine nucleotide-disulphide oxidoreductase; Adrenodoxin reductase; Pyridine nucleotide-disulphide oxidoreductase, class-II; Glutamine amidotransferase, class-II; Glutamate synthase, alpha subunit, C-terminal; Glutamate synthase, central-C; Glutamate synthase, central-N; Glutamate synthase, eukaryotic; Glutamate synthase, NADH/NADPH, small subunit 1; Alpha-helical ferredoxin
High	Obbri1_761384	13	5	11	5	57.2	0.64839	0.461493	0.930853	0.959702	2.49727	2.34253	NO	ATPase, F1/V1/A1 complex, alpha/beta subunit, nucleotide-binding; ATPase, F1/V1/A1 complex, alpha/beta subunit, C-terminal; ATPase, F1/V1/A1 complex, alpha/beta subunit, N-terminal; ATPase, V1 complex, subunit B
High	Obbri1_761697	8	4	8	4	82.1	0.851005	0.514534	0.938383	1.00097	1.8151	2.26156	NO	Copper amine oxidase, C-terminal; Copper amine oxidase, N2-terminal; Copper amine oxidase, N3-terminal; Copper amine oxidase; Copper amine oxidase, N-terminal region
High	Obbri1_762018	26	7	42	7	29.1	6.20884	3.1897	6.38006	4.45137	11.5073	6.35447	NO	20S proteasome, A and B subunits; Proteasome alpha-subunit, conserved site
High	Obbri1_762191	22	6	70	4	43.9	13.362	18.6718	10.5906	14.7777	9.62028	14.5166	NO
High	Obbri1_762583	22	6	124	4	43.1	8.33938	6.96546	9.40326	15.3786	32.6353	19.37	YES	Cellulose-binding region, fungal; Glycoside hydrolase, family 10; Glycoside hydrolase, catalytic core
High	Obbri1_763046	64	18	170	11	39.3	28.3652	26.3958	38.0604	58.8938	33.1548	70.6403	NO	Aldo/keto reductase
High	Obbri1_763099	23	7	77	6	43.2	4.89514	2.20704	9.68308	5.99537	7.00265	4.94948	NO	Aldo/keto reductase
High	Obbri1_763110	17	3	12	3	21.8	3.44202	0.994184	4.21535	1.25999	6.88994	1.56994	NO	Imidazole glycerol-phosphate dehydratase
High	Obbri1_763453	13	6	38	6	90.2	2.64853	3.18383	4.99824	6.15828	8.26865	6.73328	YES	Peptidase M36, fungalysin; Peptidase M, neutral zinc metallopeptidases, zinc-binding site
High	Obbri1_763631	66	32	290	32	62.7	17.782	12.5424	19.471	18.2922	44.8076	34.545	NO	Chaperonin Cpn60; Chaperonin Cpn60/TCP-1; Chaperonin GroEL; GroEL-like chaperone, ATPase
High	Obbri1_763658	50	13	54	13	44.3	0.753005	1.07008	5.87159	11.9136	5.0316	10.3252	NO	Taurine catabolism dioxygenase TauD/TfdA
High	Obbri1_763720	22	4	15	4	29.2	2.48342	5.01678	2.2444	9.21614	5.50654	9.97668	NO	Peptidase T1A, proteasome beta-subunit; 20S proteasome, A and B subunits
High	Obbri1_763810	49	4	21	4	13.1	10.315	3.02937	4.01274	1.76139	4.01531	2.708	NO	Profilin/allergen; Profilin, plant
High	Obbri1_764085	35	15	50	15	63.2	3.07882	3.26647	3.90996	4.22305	6.79023	7.16616	NO	Carbohydrate kinase, FGGY; Pentulose kinase
High	Obbri1_764770	19	5	13	5	34.8	1.69249	2.26422	1.71327	2.76064	2.58852	2.28772	NO	Serine/threonine-specific protein phosphatase and bis(5-nucleosyl)-tetraphosphatase; Metallophosphoesterase
High	Obbri1_764830	37	6	52	3	25.1	3.76204	3.76633	6.642	8.44726	10.9604	14.1338	NO	Aromatic-ring hydroxylase
High	Obbri1_765239	72	16	101	16	46	11.4744	9.126	19.8915	27.3697	24.9093	45.2458	NO	Aminotransferase, class V/Cysteine desulphurase; Pyridoxal phosphate-dependent transferase, major region
High	Obbri1_765275	50	15	89	15	46.1	7.49211	8.31941	6.25571	12.7729	14.7454	27.5112	NO	Oxidoreductase, N-terminal; NAD(P)-binding
High	Obbri1_765310	5	2	7	2	55.3	2.28488	0.176326	3.97308	0.611209	5.87187	0.945505	NO	FAD linked oxidase, N-terminal; FAD-linked oxidase, C-terminal; FAD-linked oxidase-like, C-terminal; FAD-binding, type 2
High	Obbri1_765365	19	7	16	5	55.9	0.980075	1.05872	1.72959	3.49232	4.05596	3.81465	NO	Cytochrome b5; FMN-dependent alpha-hydroxy acid dehydrogenase; FMN-dependent alpha-hydroxy acid dehydrogenase, active site
High	Obbri1_765523	38	6	24	6	28.6	20.4656	50.023	10.8383	25.6548	10.0954	16.6763	NO	Glucosamine/galactosamine-6-phosphate isomerase; 6-phosphogluconolactonase
High	Obbri1_765551	12	2	12	2	23	1.34414	5.93608	1.9542	7.74321	4.80466	10.6723	NO	Ras GTPase; Ras; Ras small GTPase, Ras type; Ras small GTPase, Rho type; Ras small GTPase, Rab type; Ran GTPase; Small GTP-binding protein; RNA polymerase sigma factor 54, interaction
High	Obbri1_765916	7	2	26	2	62.9	2.69511	5.92709	1.23378	9.04744	5.69275	5.29388	YES	Peptidase S53, propeptide; Peptidase S8 and S53, subtilisin, kexin, sedolisin; Proteinase inhibitor, propeptide
High	Obbri1_766186	18	4	16	4	29	1.49706	2.32908	2.64576	3.59139	3.62943	6.14943	NO	Isopentenyl-diphosphate delta-isomerase; NUDIX hydrolase, core; Isopentenyl-diphosphate delta-isomerase, type 1; NUDIX
High	Obbri1_766649	21	2	5	2	17.5		0.685375	0.292604	0.55568	2.38731	2.46228	NO	Primosome PriB/single-strand DNA-binding; Nucleic acid-binding, OB-fold-like
High	Obbri1_766924	6	2	7	2	57.7	1.06641	2.95018	1.31274	3.79478	1.72027	4.29445	NO	Clathrin adaptor, mu subunit, C-terminal; Longin-like
High	Obbri1_766982	60	17	150	17	41.8	12.4186	17.0006	18.0754	29.7572	15.9392	34.2039	NO	Kelch repeat type 1; Galactose oxidase/kelch, beta-propeller
High	Obbri1_768383	32	7	57	7	33.6	8.25067	5.11224	7.87815	8.27809	11.9861	13.9969	NO	Peptidase T1A, proteasome beta-subunit; 20S proteasome, A and B subunits; Proteasome, beta-type subunit, conserved site
High	Obbri1_770512	6	3	11	3	90	1.09645	1.30287	1.28509	1.34114	2.53737	3.08252	NO	Phosphoribosyl-AMP cyclohydrolase; Phosphoribosyl-ATP pyrophosphohydrolase; Histidinol dehydrogenase; Histidine biosynthesis trifunctional-protein; Aldehyde/histidinol dehydrogenase
High	Obbri1_770515	32	6	22	3	25.7	5.92703	4.33687	8.72123	5.78651	9.09554	5.50081	NO	Glucose/ribitol dehydrogenase; Short-chain dehydrogenase/reductase SDR; NAD(P)-binding
High	Obbri1_770607	50	12	75	12	34.1	6.6351	8.0028	9.14686	11.7992	7.78782	9.81556	NO	Aldo/keto reductase
High	Obbri1_770661	33	14	96	14	52.2	6.79216	6.49126	9.36522	8.02232	11.5082	12.4578	NO	Glycoside hydrolase, family 1; Glycoside hydrolase, catalytic core
High	Obbri1_77104	1	3	9	3	162.7	3.87978	4.8697	3.69922	9.82888	5.18187	7.42738	NO	S1, RNA binding; RNA-processing protein, HAT helix; Tetratricopeptide region; Nucleic acid-binding, OB-fold-like
High	Obbri1_771083	19	3	7	3	17.5	1.08105	1.19621	0.720325	2.16028	2.57391	5.48962	NO	Ribosomal protein S19/S15; Ribosomal protein S15, eukaryotic/archaeal
High	Obbri1_771307	24	7	45	7	40.1	6.08266	2.96384	4.72268	3.21034	8.27709	10.6204	NO	Uroporphyrinogen decarboxylase (URO-D); Uroporphyrinogen decarboxylase HemE
High	Obbri1_771735	16	4	13	4	43.4	1.07241	1.85632	0.767153	2.00006	0.732943	2.27365	NO	Proteasome component region PCI
High	Obbri1_771916	31	7	23	7	34.4	2.69455	5.92334	1.92575	5.91668	4.51674	4.08101	NO	Purine phosphorylase, family 2; Methylthioadenosine phosphorylase
High	Obbri1_772616	48	12	49	12	25.9	10.2295	7.41479	6.91294	5.7552	8.24999	5.80908	NO	Ribosomal protein L6E
High	Obbri1_772962	14	3	9	3	37	1.62836	1.97788	3.45764	4.68382	4.88311	8.44368	NO	Dihydroorotate dehydrogenase, core
High	Obbri1_773288	4	2	13	2	59.1	21.82	17.9947	25.4752	24.566	34.7794	41.3748	YES	Carboxylesterase, type B
High	Obbri1_773377	70	25	399	16	36	59.7124	95.9927	46.0548	83.4716	101.578	127.495	NO	Transaldolase; Transaldolase AB
High	Obbri1_773640	10	7	14	7	106.7	0.611236	1.86314	0.973803	2.74094	0.936663	3.536	NO	Beta-trefoil; LAG1, DNA binding; p53-like transcription factor, DNA-binding; Immunoglobulin E-set
High	Obbri1_773650	21	3	11	3	28.2	3.83637	3.11586	2.28054	2.67102	2.44847	3.55526	NO	HAD-superfamily hydrolase, subfamily IB, hypothetical 1; HAD-superfamily hydrolase, subfamily IB, PSPase-like
High	Obbri1_773876	17	10	15	10	93.8	1.17688	2.21551	1.41848	2.19614	2.1912	3.40315	NO	Glutamyl/glutaminyl-tRNA synthetase, class Ic; Glutaminyl-tRNA synthetase, class Ic, non-specific RNA-binding region part 1; Glutaminyl-tRNA synthetase, class Ic; Aminoacyl-tRNA synthetase, class I, conserved site; Ribosomal protein L25/Gln-tRNA synthetase, anti-codon-binding
High	Obbri1_774037	8	4	11	4	67.1	0.890615	1.29036	0.303867	2.15453	1.72863	6.47297	NO	Nucleic acid binding, OB-fold, tRNA/helicase-type; Replication factor-A protein 1, N-terminal; Replication factor-A, C-terminal; Replication factor-a protein 1 Rpa1; Nucleic acid-binding, OB-fold-like
High	Obbri1_774074	36	7	25	7	43.3	0.951991	2.41234	1.08707	3.3083	3.78777	5.4522	NO	WD40 repeat; WD40 repeat-like
High	Obbri1_775327	13	7	25	7	94.6	0.484416	1.44144	0.413709	1.6683	1.53637	3.12294	NO	HEAT; Importin-beta, N-terminal; Armadillo; Carbamoyl phosphate synthetase, large subunit, ATP-binding; Armadillo-type fold
High	Obbri1_775394	44	15	137	15	54.5	12.6699	10.685	22.6488	21.6588	21.3058	26.1593	NO	Aldehyde dehydrogenase; Aldehyde dehydrogenase NAD(P)-dependent; Aldehyde dehydrogenase, conserved site; Aldehyde/histidinol dehydrogenase; Sea anemone cytolysin
High	Obbri1_775629	28	7	93	1	41.5	11.0441	5.74733	21.8443	14.8758	23.6903	18.1776	NO	Actin/actin-like; Actin, conserved site
High	Obbri1_775987	15	6	13	6	59.3	2.53513	0.321256	2.00594	0.948287	5.40932	1.4202	NO	AAA ATPase, core; AAA+ ATPase, core
High	Obbri1_776181	86	23	353	23	34.6	74.2235	70.6117	69.1867	76.7663	118.127	119.47	NO	Lactate/malate dehydrogenase; L-lactate/malate dehydrogenase; Malate dehydrogenase, NAD-dependent, eukaryotes and gamma proteobacteria; NAD(P)-binding; Lactate dehydrogenase/glycoside hydrolase, family 4, C-terminal
High	Obbri1_776189	13	5	7	5	51.9	1.80859	1.41418	1.49738	1.43688	2.09696	1.77936	NO	Protein synthesis factor, GTP-binding; Translation elongation factor EFTu/EF1A, domain 2; Initiation factor eIF2 gamma, C terminal; Translation elongation and initiation factors/Ribosomal, beta-barrel; Translation elongation factor EF1A/initiation factor IF2gamma, C-terminal
High	Obbri1_776282	14	3	35	3	58.2	7.73207	8.57374	13.1607	15.3557	10.4401	6.3992	YES	Peptidase S53, propeptide; Peptidase S8 and S53, subtilisin, kexin, sedolisin; Proteinase inhibitor, propeptide
High	Obbri1_776408	23	7	17	7	43.9	1.13279	0.847308	0.894441	1.576	3.20464	2.71849	NO	Cys/Met metabolism, pyridoxal phosphate-dependent enzyme; Pyridoxal phosphate-dependent transferase, major region
High	Obbri1_776429	29	6	33	6	27.4	6.75657	6.88374	7.06551	10.9669	10.4807	14.2044	NO	20S proteasome, A and B subunits; Proteasome alpha-subunit, conserved site
High	Obbri1_776609	34	6	12	6	38	1.25932	0.769253	2.94458	1.34496	3.35357	1.29041	NO	Beta-lactamase-like
High	Obbri1_776891	13	6	9	6	80.7	0.257333	0.501551	0.593027	0.500871	2.02799	1.1469	NO	Ferredoxin; Molybdopterin oxidoreductase; NADH-quinone oxidoreductase, chain G, C-terminal; NADH-quinone oxidoreductase, chain G; NADH dehydrogenase 75 kDa subunit, conserved site
High	Obbri1_777150	34	4	24	4	13.8	16.5717	16.5017	8.81584	8.24888	11.5331	10.4829	NO	Ribosomal protein S10; Ribosomal protein S10, eukaryotic/archaeal
High	Obbri1_777519	30	12	56	12	57.4	4.55133	5.62804	6.82225	10.0904	12.4318	17.8078	NO	BPG-independent PGAM, N-terminal; Metalloenzyme; Phosphoglycerate mutase, 2,3-bisphosphoglycerate-independent; Alkaline-phosphatase-like, core domain
High	Obbri1_777641	20	4	23	4	24.5	11.5312	15.3961	8.5442	12.8869	10.5114	19.6251	NO	Ribosomal protein L1
High	Obbri1_777775	29	5	39	5	21.7	9.98918	11.2304	6.44063	5.89363	4.83425	4.97787	NO	Ribosomal protein L22/L17; Ribosomal protein L22/L17, eukaryotic/archaeal
High	Obbri1_778126	26	8	68	8	41.2	9.55751	8.77719	5.95738	6.44538	8.4928	6.35771	NO	Ribosomal protein L4/L1e; Ribosomal protein L4/L1e, eukaryotic/archaeal, conserved site
High	Obbri1_778343	10	2	6	2	31.2	3.0882	5.32852	3.7651	7.59024	5.73584	12.9346	NO	NIPSNAP
High	Obbri1_778449	68	12	176	12	27	25.5225	28.0896	29.6732	33.4464	32.3552	43.2044	NO	Triosephosphate isomerase
High	Obbri1_778985	18	8	19	8	70.3	0.750848	0.69912	1.81232	1.48016	4.77986	2.62206	NO	FAD-dependent pyridine nucleotide-disulphide oxidoreductase; Pyridine nucleotide-disulphide oxidoreductase, class I; Fumarate reductase/succinate dehydrogenase flavoprotein, N-terminal; Fumarate reductase/succinate dehydrogenase flavoprotein, C-terminal; Succinate dehydrogenase or fumarate reductase, flavoprotein subunit; Succinate dehydrogenase, flavoprotein subunit; Fumarate reductase/succinate…
High	Obbri1_779309	22	10	50	10	53.6	4.67616	2.34131	5.29941	6.65232	10.6301	12.1473	NO	Pyridine nucleotide-disulphide oxidoreductase, NAD-binding region; FAD-dependent pyridine nucleotide-disulphide oxidoreductase; Pyridine nucleotide-disulphide oxidoreductase, class I; Mercuric reductase; Pyridine nucleotide-disulphide oxidoreductase, dimerisation; Dihydrolipoamide dehydrogenase; Pyridine nucleotide-disulphide oxidoreductase, class I, active site; FAD/NAD-linked reductase, dimeris…
High	Obbri1_779749	46	4	34	4	18.8	6.30959	8.02635	13.9664	16.635	8.3232	13.5489	NO	Glyoxalase/bleomycin resistance protein/dioxygenase; Glyoxalase I
High	Obbri1_780822	6	3	8	3	61.9	1.13783	0.720238	1.31692	0.806307	2.1213	1.18869	NO	Protein kinase, core; Serine/threonine protein kinase-related; Protein kinase, C-terminal; Tyrosine protein kinase; Serine/threonine protein kinase; Protein kinase ATP binding, conserved site; Serine/threonine protein kinase, active site; C2 calcium/lipid-binding region, CaLB; Protein kinase-like
High	Obbri1_780998	20	10	77	10	66.3	16.3145	11.6706	10.3077	8.15655	15.0477	12.4238	NO	Ribosomal protein S7e; Tetratricopeptide TPR-1; Tetratricopeptide region
High	Obbri1_781070	51	34	252	34	98.7	74.6732	31.3288	98.4004	31.5682	72.9833	48.0797	NO	Glycosyl transferase, family 35; Glycogen/starch/alpha-glucan phosphorylase
High	Obbri1_781193	27	8	53	8	44.3	6.51362	3.77959	8.74819	7.60625	13.142	8.85439	NO	Cell division/GTP binding protein; Septin
High	Obbri1_781240	9	2	7	2	26.6	2.18836	9.266	3.63192	15.1072	5.55103	21.5942	NO	Short-chain dehydrogenase/reductase SDR; Glucose/ribitol dehydrogenase; NAD(P)-binding
High	Obbri1_782289	41	10	78	10	33.8	15.4398	16.0119	17.8615	17.9732	27.1291	27.6465	NO
High	Obbri1_782670	9	5	8	5	73.7	1.47995	1.58431	1.25832	1.27446	2.0368	5.23664	NO	UBA/THIF-type NAD/FAD binding fold; E1-like protein-activating enzyme Gsa7p/Apg7p; Molybdenum cofactor biosynthesis
High	Obbri1_782980	33	5	25	5	26.3	1.81612	4.03157	3.62709	7.29623	6.27543	14.3826	NO	Translation initiation factor IF6; Regulator of chromosome condensation, RCC1
High	Obbri1_783075	3	2	5	2	68.7	4.08948	0.519549	7.72608	0.906232	13.7782	1.06793	NO	Src homology-3; Neutrophil cytosol factor 2; Actin-binding, cofilin/tropomyosin type
High	Obbri1_783259	49	21	237	21	62.8	32.97	38.7098	22.4026	36.5112	35.5695	50.6689	NO	Cytochrome b5; Fumarate reductase/succinate dehydrogenase flavoprotein, N-terminal; Flavocytochrome c
High	Obbri1_783955	2	3	7	3	152.9	1.18553	0.925644	1.13026	1.15573	2.21644	0.781893	NO	WD40 repeat; Histone-fold; Prp18; WD40 repeat-like
High	Obbri1_784167	14	5	10	5	65.3	0.371907	0.403061	1.6746	2.06995	1.56767	2.60702	NO	FAD-dependent pyridine nucleotide-disulphide oxidoreductase; Aromatic-ring hydroxylase; Monooxygenase, FAD-binding; Phenol hydroxylase, C-terminal dimerisation; Thioredoxin-like fold
High	Obbri1_784856	10	5	13	5	59.7	2.43718	1.68041	3.15475	3.03429	2.90622	3.33883	NO	Galactokinase; Mevalonate and galactokinase; GHMP kinase; GHMP kinase, C-terminal; GHMP kinase, ATP-binding, conserved site
High	Obbri1_784860	23	5	13	5	40.1	1.56551	3.04408	2.28817	5.62763	1.15804	8.02775	NO
High	Obbri1_784936	38	22	143	22	92.6	14.1675	15.9858	10.5468	15.1052	8.25664	18.2067	NO	Glycoside hydrolase, family 3, N-terminal; Glycoside hydrolase, family 3, C-terminal; PA14; Glycoside hydrolase, catalytic core
High	Obbri1_785280	13	2	9	2	19.6	2.61477	4.10413	1.57203	3.3777	2.8237	5.86717	NO	ARP23 complex 20 kDa subunit
High	Obbri1_786094	18	5	27	5	39.3	3.61953	4.22185	7.09	7.99132	17.5543	10.3345	YES	Glycoside hydrolase, family 10; Glycoside hydrolase, catalytic core
High	Obbri1_786760	38	22	137	22	66.6	7.5933	3.70636	25.7216	19.0872	40.303	26.1298	NO	Thiamine pyrophosphate enzyme, central region; Thiamine pyrophosphate enzyme, C-terminal TPP-binding; Thiamine pyrophosphate enzyme, N-terminal TPP binding region; Pyruvate decarboxylase/indolepyruvate decarboxylase
High	Obbri1_786984	62	15	216	15	33.6	46.465	47.9626	40.1995	68.7717	73.7092	130.785	NO	Inorganic pyrophosphatase
High	Obbri1_787008	8	2	8	2	35.7	22.4224	7.9513	10.4461	26.2275	14.7124	8.43405	NO
High	Obbri1_787011	40	8	27	8	36	1.42035	1.70952	2.24907	3.33817	4.02315	5.44286	NO	Protein of unknown function DUF52
High	Obbri1_787015	54	20	438	20	50.1	90.3837	85.4131	102.369	116.902	201.332	222.673	NO	Protein synthesis factor, GTP-binding; Translation elongation factor EFTu/EF1A, C-terminal; Translation elongation factor EFTu/EF1A, domain 2; Translation elongation factor EF1A, eukaryotic and archaeal; Translation elongation and initiation factors/Ribosomal, beta-barrel; Translation elongation factor EF1A/initiation factor IF2gamma, C-terminal
High	Obbri1_787130	4	3	5	3	111.7	3.14199	0.593788	1.99196	0.433381	5.77982	2.26552	NO	Pyridoxal phosphate-dependent decarboxylase; Pyridoxal phosphate-dependent transferase, major region
High	Obbri1_787194	65	26	478	26	53.7	92.6425	126.59	136.5	108.463	163.396	170.465	NO	6-phosphogluconate dehydrogenase; 6-phosphogluconate dehydrogenase, C-terminal; 6-phosphogluconate dehydrogenase, NAD-binding; 6-phosphogluconate dehydrogenase, decarboxylating; 6-phosphogluconate-binding site; 6-phosphogluconate dehydrogenase, C-terminal-like; NAD(P)-binding
High	Obbri1_787224	19	6	19	6	44.7	1.02525	1.58757	1.10481	2.03769	2.17779	1.64132	NO	ATP-citrate lyase/succinyl-CoA ligase; ATP-grasp fold, succinyl-CoA synthetase-type; Succinyl-CoA synthetase, beta subunit; Succinyl-CoA synthetase-like
High	Obbri1_787237	3	4	10	4	217			0.75305	0.605864	1.10302	2.17063	NO	HEAT; Armadillo-type fold
High	Obbri1_787245	24	6	11	6	40.1	1.5038	0.950445	1.35553	1.18797	3.62893	2.43557	NO	Protein kinase, core; Serine/threonine protein kinase-related; Tyrosine protein kinase; Serine/threonine protein kinase; Protein kinase ATP binding, conserved site; Serine/threonine protein kinase, active site; Protein kinase-like
High	Obbri1_787289	22	7	23	7	59.9	5.92058	8.65478	2.04192	2.58401	3.4644	4.70495	NO	Molybdenum cofactor biosynthesis
High	Obbri1_787294	38	8	72	2	37.5	0.687017	0.908144	0.739034	1.48584	1.74177	2.93471	NO	Alcohol dehydrogenase, zinc-binding; GroES-like; NAD(P)-binding
High	Obbri1_787295	44	11	89	10	38.1	16.7372	15.9396	10.4449	13.5996	10.1803	9.33484	NO	Alcohol dehydrogenase, zinc-binding; GroES-like; NAD(P)-binding
High	Obbri1_787307	4	3	5	3	118.3				0.0811305	0.780844	1.38869	NO	Haem peroxidase, animal; Haem peroxidase; Cytochrome P450
High	Obbri1_787310	47	9	76	3	37.4	5.18634	4.53494	8.82052	10.6601	16.1942	19.3458	NO	Alcohol dehydrogenase, zinc-binding; GroES-like; NAD(P)-binding
High	Obbri1_787378	51	32	242	32	90	11.6087	9.07772	12.7833	17.7397	26.9892	33.222	NO	Peptidase S16, Lon protease; AAA ATPase, core; AAA ATPase VAT, N-terminal; Vps4 oligomerisation, C-terminal; AAA+ ATPase, core; AAA ATPase, CDC48; TonB box, conserved site; AAA ATPase, conserved site; Aspartate decarboxylase-like fold
High	Obbri1_787433	70	15	329	14	27.2	104.306	109.135	193.453	232.865	165.768	198.221	NO	Dienelactone hydrolase
High	Obbri1_787451	68	14	139	13	27.2	19.521	18.1134	24.4263	27.4816	22.3995	32.7315	NO	Dienelactone hydrolase
High	Obbri1_787466	25	2	7	2	12	6.68263	3.26215	3.22435	2.31501	4.50591	2.1683	NO	Ribosomal protein L35Ae
High	Obbri1_787489	57	21	212	16	56	21.8071	16.502	30.6829	32.0357	35.674	47.3444	NO	Aldehyde dehydrogenase; Methylmalonate-semialdehyde dehydrogenase; Aldehyde dehydrogenase, conserved site; Aldehyde/histidinol dehydrogenase
High	Obbri1_787493	51	17	135	13	58.4	8.40659	5.34722	7.72637	5.69039	14.6124	9.78491	NO	Aldehyde dehydrogenase; Methylmalonate-semialdehyde dehydrogenase; Aldehyde dehydrogenase, conserved site; Aldehyde/histidinol dehydrogenase
High	Obbri1_787497	57	17	134	17	50.3	4.34821	7.45541	8.1507	26.9337	14.488	20.2955	NO	Rab GTPase activator; Rab GDI protein
High	Obbri1_787523	19	3	20	3	24.2	2.8288	6.87121	1.89515	2.7714	3.86328	1.9371	NO	Ribosomal protein L13e
High	Obbri1_787533	42	5	19	5	16	5.6041	2.96839	2.61826	0.385321	3.99868	0.651406	NO	Ribosomal protein S9
High	Obbri1_787546	24	10	51	10	59.4	2.08745	5.75709	2.9569	4.76928	5.61752	7.57904	NO	Alpha-D-phosphohexomutase, C-terminal; Alpha-D-phosphohexomutase, alpha/beta/alpha domain I; Alpha-D-phosphohexomutase, alpha/beta/alpha domain II; Phosphoacetylglucosamine mutase; Alpha-D-phosphohexomutase, conserved site; Alpha-D-phosphohexomutase, alpha/beta/alpha I, II and III
High	Obbri1_787547	7	2	5	2	32.3	2.89869	1.65267	2.52186	3.08756	4.58354	3.37934	NO	NSF attachment protein
High	Obbri1_787578	30	6	23	6	39.1	3.36498	1.02163	1.1732	1.66028	2.34676	2.03533	NO	Glutathione S-transferase, N-terminal; Glutathione S-transferase, C-terminal-like; Thioredoxin-like fold
High	Obbri1_787591	38	9	46	9	37.3	10.4672	8.37542	6.35451	4.64295	4.00581	4.49843	NO	Acetohydroxy acid isomeroreductase, catalytic; 6-phosphogluconate dehydrogenase, C-terminal-like; NAD(P)-binding
High	Obbri1_787621	41	9	69	9	32.6	5.94416	4.37959	7.58196	8.48019	11.1834	13.5429	NO	Aldose 1-epimerase; Glycoside hydrolase-type carbohydrate-binding
High	Obbri1_787673	41	16	207	16	62.2	22.3426	16.891	22.9241	20.7192	25.2231	16.531	NO	Gamma-glutamyltranspeptidase
High	Obbri1_787685	39	8	122	8	25.2	18.8326	107.577	29.8236	63.8249	23.7386	63.4892	NO	Alkyl hydroperoxide reductase/ Thiol specific antioxidant/ Mal allergen; Thioredoxin-like fold
High	Obbri1_787686	38	7	45	7	27.4	2.74015	2.53938	3.34749	3.58078	6.4872	7.55082	NO	20S proteasome, A and B subunits; Proteasome alpha-subunit, conserved site
High	Obbri1_787696	64	12	81	12	31.3	8.37617	9.53748	5.83803	8.37923	8.91465	9.67492	NO	20S proteasome, A and B subunits; Proteasome alpha-subunit, conserved site
High	Obbri1_787721	14	5	20	5	49.1	2.89184	2.36147	1.73082	3.09772	4.15435	5.87845	NO	NAD-dependent epimerase/dehydratase; NAD(P)-binding
High	Obbri1_787768	19	5	11	5	52.2	0.943669	6.3563	1.73914	8.75309	1.65613	9.3261	NO	Aldehyde dehydrogenase; Succinic semialdehyde dehydrogenase; Aldehyde dehydrogenase, conserved site; Aldehyde/histidinol dehydrogenase
High	Obbri1_787792	3	2	7	2	67.9	4.85613	6.73734	5.31616	9.1029	9.33932	6.23762	NO
High	Obbri1_787829	55	9	71	9	30.1	6.0283	6.74574	7.49867	9.44485	14.0395	15.9737	NO	Short-chain dehydrogenase/reductase SDR; Glucose/ribitol dehydrogenase; NAD(P)-binding
High	Obbri1_787836	23	7	28	7	50.7	3.10737	2.45968	6.3151	7.18166	7.2434	5.72987	NO	FAD linked oxidase, N-terminal; Berberine/berberine-like; FAD-binding, type 2
High	Obbri1_787907	9	4	15	4	64.5	2.4788	2.77109	2.90072	5.11722	6.2679	8.41945	NO	Aminoacyl-tRNA synthetase, class II (G, H, P and S); Anticodon-binding; Histidyl-tRNA synthetase, class IIa, subgroup; Aminoacyl-tRNA synthetase, class II; S15/NS1, RNA-binding
High	Obbri1_787934	40	11	51	11	39.1	5.9168	4.60661	6.00061	8.28766	9.16162	11.6827	NO	6-phosphogluconate dehydrogenase, NAD-binding; 6-phosphogluconate dehydrogenase, C-terminal-like; NAD(P)-binding
High	Obbri1_788048	58	9	51	9	22.6	3.76388	3.79777	5.2159	6.24952	6.79755	10.1836	NO	Ras GTPase; Ras; Ras small GTPase, Ras type; Ras small GTPase, Rho type; Ras small GTPase, Rab type; Ran GTPase; Small GTP-binding protein; RNA polymerase sigma factor 54, interaction
High	Obbri1_788065	7	3	21	3	68.4	3.50667	3.96377	7.30978	6.39625	8.33409	5.57389	NO	Histidine acid phosphatase
High	Obbri1_788085	29	7	71	7	36	3.0193	3.41263	10.0294	11.7571	13.8985	13.5088	NO	Aldo/keto reductase
High	Obbri1_788094	49	11	77	11	31.8	8.8446	9.37428	11.9355	17.7574	14.3552	21.8776	NO	Short-chain dehydrogenase/reductase SDR; Glucose/ribitol dehydrogenase; NAD(P)-binding
High	Obbri1_788114	30	7	53	7	24.1	6.99826	7.69658	11.4954	18.1081	17.5282	19.6817	NO	Ras GTPase; Ran GTPase; Ras; Ras small GTPase, Ras type; Ras small GTPase, Rho type; Ras small GTPase, Rab type; Small GTP-binding protein
High	Obbri1_788125	21	4	6	4	36.3	0.4681	0.60403	0.913445	1.07047	1.86523	1.81758	NO	6-phosphogluconate dehydrogenase, NAD-binding; 3-hydroxyisobutyrate dehydrogenase; 3-hydroxyisobutyrate dehydrogenase-related, conserved site; 6-phosphogluconate dehydrogenase, C-terminal-like; NAD(P)-binding
High	Obbri1_788149	11	2	12	2	25.6	3.42555	4.77226	3.76481	5.33481	2.60676	2.3513	NO	Histone H1/H5
High	Obbri1_788159	9	7	13	7	122.2	1.15654	1.20365	1.50146	1.10035	2.63131	2.83678	NO	Importin-beta, N-terminal; Exportin-1/Importin-beta-like; Exportin 1, C-terminal; Armadillo-type fold
High	Obbri1_788201	8	7	20	7	88.6	2.51206	1.51342	1.41962	1.23465	3.52383	2.38079	NO	Glycoside hydrolase, family 31; Glycoside hydrolase, catalytic core
High	Obbri1_788204	39	20	189	20	73.9	24.6181	22.3415	16.7528	18.0685	23.2137	23.5178	NO	Transketolase, N-terminal; Transketolase, central region; Transketolase, C-terminal; Bacterial transketolase; Transketolase, C-terminal/Pyruvate-ferredoxin oxidoreductase, domain II
High	Obbri1_788224	64	14	171	14	32.2	14.1219	13.8719	22.2381	24.163	25.6274	25.6347	NO
High	Obbri1_788238	54	29	385	29	69.6	30.697	36.9983	42.794	62.2814	60.4428	84.008	NO	Transketolase, N-terminal; Transketolase, central region; Transketolase, C-terminal; Carbohydrate kinase, FGGY; Transketolase, C-terminal/Pyruvate-ferredoxin oxidoreductase, domain II
High	Obbri1_788243	48	10	68	10	28.8	8.7399	63.5013	9.9719	25.1683	12.1846	19.041	NO	Short-chain dehydrogenase/reductase SDR; Glucose/ribitol dehydrogenase; NAD(P)-binding
High	Obbri1_788322	9	5	10	5	90	1.14014	4.20152	0.947587	1.12806	0.859769	2.8414	NO	Urease, gamma subunit region; Urease, beta subunit; Urease, alpha subunit; Urease alpha-subunit, N-terminal; Amidohydrolase 1; Urease, gamma/beta/alpha type; Metal-dependent hydrolase, composite
High	Obbri1_788334	37	11	64	11	31	14.3878	15.1335	9.09232	37.3007	7.11892	42.7797	NO	Aldo/keto reductase
High	Obbri1_788339	6	2	10	2	52.1	0.58137	0.846214	1.34366	1.6164	2.07191	1.75534	NO	Pyruvate carboxyltransferase; Homocitrate synthase, fungi and archaea; Alpha-isopropylmalate/homocitrate synthase, conserved site
High	Obbri1_788357	27	7	37	7	48.1	3.28467	1.87211	3.98625	2.1988	6.53639	4.43549	NO	Actin/actin-like
High	Obbri1_788396	42	27	161	27	93.1	7.4551	9.38532	12.5187	18.7241	23.8703	37.0996	NO	Glycoside hydrolase, family 3, N-terminal; Glycoside hydrolase, family 3, C-terminal; PA14; Glycoside hydrolase, catalytic core
High	Obbri1_788409	15	4	16	4	33.3	3.53255	3.41086	4.66309	6.03329	8.19675	10.1281	NO	Nitrilase/cyanide hydratase and apolipoprotein N-acyltransferase; Protein of unknown function UPF0012, conserved site
High	Obbri1_788411	17	4	11	4	27.4	0.570838	0.803213	0.763544	0.801989	0.88074	0.473415	NO	Adenylate/cytidine kinase, N-terminal; Adenylate kinase; UMP-CMP kinase
High	Obbri1_788432	17	6	21	6	44.7	3.69207	3.21221	4.70274	3.09616	5.20259	3.95663	NO	Protein kinase, core; Serine/threonine protein kinase-related; Tyrosine protein kinase; Serine/threonine protein kinase; Protein kinase ATP binding, conserved site; Serine/threonine protein kinase, active site; Protein kinase-like
High	Obbri1_788437	22	17	66	17	102.4	4.10069	5.06172	3.6241	7.61631	7.35355	11.5128	NO	Peptidase M1, membrane alanine aminopeptidase, N-terminal; Peptidase M, neutral zinc metallopeptidases, zinc-binding site
High	Obbri1_788454	11	6	46	6	71.8	6.39538	12.0172	6.2825	6.89013	14.5137	13.1898	YES	Beta-Ig-H3/fasciclin
High	Obbri1_788505	13	8	26	8	90.9	1.95582	15.5682	1.52928	2.24118	3.67934	4.25773	YES	Glycoside hydrolase, family 63; Six-hairpin glycosidase-like
High	Obbri1_788511	24	6	17	6	32.9	0.964098	3.02626	0.840393	1.36545	2.39352	2.07512	NO	3-hydroxyacyl-CoA dehydrogenase, C-terminal; 3-hydroxyacyl-CoA dehydrogenase, NAD binding; 6-phosphogluconate dehydrogenase, C-terminal-like; NAD(P)-binding
High	Obbri1_788577	15	5	25	5	48.3	4.80917	4.85602	2.78953	2.40466	3.79824	3.17829	NO	Aminotransferase class-III; Pyridoxal phosphate-dependent transferase, major region
High	Obbri1_78859	28	4	44	4	24.1	4.89236	5.97127	8.25959	8.13228	7.77832	7.58539	NO	Ribulose-phosphate 3-epimerase; Ribulose-phosphate binding barrel
High	Obbri1_788597	55	11	54	10	31.4	2.6881	1.83527	7.18676	6.52425	23.1904	5.53883	NO	Short-chain dehydrogenase/reductase SDR; Glucose/ribitol dehydrogenase; NAD(P)-binding
High	Obbri1_788599	59	14	154	14	34.7	17.5267	16.9371	25.0425	21.2938	27.3905	23.8958	NO	WD40 repeat; WD40 repeat-like
High	Obbri1_788626	36	15	91	15	53.3	6.91521	6.94525	5.12505	8.1509	10.5771	16.4195	NO	MmgE/PrpD; 2-methylcitrate dehydratase PrpD
High	Obbri1_788685	34	12	54	12	50.3	3.6919	2.9648	8.45644	7.25642	17.9034	17.8925	NO	Oxidoreductase, N-terminal; Oxidoreductase putative, C-terminal; NAD(P)-binding
High	Obbri1_788713	25	4	17	4	30.4	0.737497	0.988298	2.76324	2.71008	4.15736	2.64665	NO	Methyltransferase type 11
High	Obbri1_788714	60	41	475	41	79.5	38.0463	34.2866	45.6769	49.8029	90.2555	92.7248	NO	Heat shock protein Hsp90; ATP-binding region, ATPase-like
High	Obbri1_788737	19	7	32	7	50.7	10.8583	6.26251	7.07582	5.26246	7.67707	4.65801	NO	Citrate synthase-like; Citrate synthase, eukaryotic; Citrate synthase-like, core
High	Obbri1_788739	5	3	13	3	127.1	0.926893	0.728981	1.67719	3.02993	2.48596	4.95027	NO	Peptidase C19, ubiquitin carboxyl-terminal hydrolase 2; MATH; TRAF-like
High	Obbri1_788757	12	5	19	5	66.3	2.30297	4.50824	1.16454	3.50561	1.50136	3.34852	NO	Glutamine amidotransferase, class-II; Asparagine synthase; Asparagine synthase, glutamine-hydrolyzing
High	Obbri1_788758	46	13	73	13	37.4	7.89447	9.66128	15.9974	23.5696	10.1856	19.6522	NO	Aldo/keto reductase
High	Obbri1_788772	60	16	62	15	45.4	6.25963	6.68363	11.1934	9.82587	12.0789	9.75321	NO	Aspartate/other aminotransferase; Aminotransferase, class I and II; Aminotransferases, class-I, pyridoxal-phosphate-binding site; Pyridoxal phosphate-dependent transferase, major region
High	Obbri1_788790	18	6	8	6	49.8	0.550028	0.438717	1.78429	1.77068	1.44387	1.86526	NO	Peptidase M24, catalytic core
High	Obbri1_788801	64	32	212	32	58.9	12.088	21.6759	13.6037	33.901	19.6945	50.1339	NO	Pyridine nucleotide-disulphide oxidoreductase, NAD-binding region; FAD-dependent pyridine nucleotide-disulphide oxidoreductase; Pyridine nucleotide-disulphide oxidoreductase, class I; Rieske [2Fe-2S] region; FAD/NAD-linked reductase, dimerisation
High	Obbri1_788833	10	4	11	4	50.2	1.36865	0.95471	2.25511	1.33959	3.61627	1.71462	NO	Tubulin; Beta tubulin; Tubulin/FtsZ, GTPase; Tubulin/FtsZ, C-terminal
High	Obbri1_788834	18	5	11	5	48.8	0.847966	0.557226	2.05718	1.56363	3.51039	1.58986	NO	Protein of unknown function DUF1479
High	Obbri1_788895	21	4	6	4	35.4	0.276097	0.0878799	0.773047	1.68106	3.35064	4.38358	NO	Arp2/3 complex, 34kDa subunit p34-Arc
High	Obbri1_788910	14	4	8	4	43.5	0.950115	0.772683	0.401414	1.37882	0.663034	1.91673	NO	GTP1/OBG; GTP-binding protein, HSR1-related; Protein of unknown function DUF933; Conserved hypothetical protein CHP00092; GTP-binding; TGS-like
High	Obbri1_788918	52	18	141	18	50.9	13.181	12.0555	9.89326	13.8817	31.0609	30.8566	NO	Citrate synthase-like; Citrate synthase, eukaryotic; Citrate synthase-like, core
High	Obbri1_788944	67	21	391	21	35.4	112.554	107.649	71.4382	113.776	99.445	131.457	NO	Aldo/keto reductase
High	Obbri1_788967	12	2	27	2	41.4	22.6526	33.7092	9.19674	17.3977	30.852	17.6592	YES	Cellulose-binding region, fungal; Glycoside hydrolase, family 5; Glycoside hydrolase, catalytic core
High	Obbri1_788970	63	15	168	15	31.8	27.3068	20.3855	36.841	32.8817	43.1163	45.0293	NO	Putative esterase; S-formylglutathione hydrolase
High	Obbri1_789020	38	13	103	13	50.8	20.164	23.2532	27.4388	37.9785	33.1725	39.1742	NO	Cell division/GTP binding protein; Septin
High	Obbri1_789036	27	7	12	7	36.5	0.211907	1.39111	0.780098	3.82811	1.31947	5.80433	NO	Alcohol dehydrogenase, zinc-binding; Alcohol dehydrogenase GroES-like; GroES-like; NAD(P)-binding
High	Obbri1_789063	18	6	15	6	63.5	0.545657	0.589267	0.926546	1.3834	2.25631	2.03589	NO	AMP-dependent synthetase and ligase
High	Obbri1_789071	19	6	15	6	51.6	0.683127	1.34138	1.2865	2.19814	2.37801	2.59899	NO	Seryl-tRNA synthetase, class IIa; Aminoacyl-tRNA synthetase, class II (G, H, P and S); Seryl-tRNA synthetase, class IIa, N-terminal; Aminoacyl-tRNA synthetase, class II; tRNA-binding arm
High	Obbri1_789122	42	16	119	16	55.3	5.57372	5.57976	7.42524	12.0647	14.1696	20.1864	NO	Hexokinase
High	Obbri1_789128	20	3	8	3	29.2	0.594959	0.572856	0.658256	0.952372	2.28085	1.67757	NO	Short-chain dehydrogenase/reductase SDR; Glucose/ribitol dehydrogenase; NAD(P)-binding
High	Obbri1_789142	41	6	34	6	16	9.79715	9.78896	6.6788	5.13143	6.2567	6.64141	NO	Ribosomal protein S12e; Ribosomal protein L7Ae/L30e/S12e/Gadd45
High	Obbri1_789242	24	11	37	11	66.2	3.9203	4.09936	2.8233	2.96678	4.52528	3.73052	NO	Glucose-methanol-choline oxidoreductase, N-terminal; Glucose-methanol-choline oxidoreductase, C-terminal; Glucose-methanol-choline oxidoreductase
High	Obbri1_789244	34	19	122	19	59.5	13.7541	11.0066	13.1668	13.5353	16.9795	23.6418	NO	Aldehyde dehydrogenase; Delta-1-pyrroline-5-carboxylate dehydrogenase 1; Aldehyde dehydrogenase, conserved site; Aldehyde/histidinol dehydrogenase
High	Obbri1_789246	10	4	13	4	51.1	0.118127	0.12011	0.668548	2.15625	0.612438	3.42049	NO	O-methyltransferase, family 2; Orn/DAP/Arg decarboxylase 2
High	Obbri1_789264	29	9	73	9	45.7	3.61214	4.30868	7.44103	8.02748	8.26181	10.2634	NO	Oxidative stress survival, Svf1-like
High	Obbri1_789280	8	3	6	3	44.8	0.607608	2.06132	1.12855	2.65161	0.587997	1.57122	NO	WD40 repeat; WD40 repeat-like
High	Obbri1_789299	44	10	98	10	33.7	30.2768	27.2125	26.2658	23.8129	36.3128	29.4379	NO	Ribosomal protein 60S; Ribosomal protein L10
High	Obbri1_789392	45	14	84	14	49.7	8.38088	6.9876	7.04174	9.5116	14.8801	19.0661	NO	Acyl-CoA oxidase/dehydrogenase, type 1; Acyl-CoA dehydrogenase/oxidase, central region; Acyl-CoA dehydrogenase/oxidase C-terminal; Acyl-CoA dehydrogenase/oxidase, middle and N-terminal
High	Obbri1_789398	12	6	15	6	55.3	4.6778	2.3015	1.17279	0.227422	3.85652	0.311498	YES	Uncharacterised conserved protein UCP028846; Six-hairpin glycosidase-like
High	Obbri1_789429	26	9	33	9	52.5	4.00466	3.6148	2.51749	2.57737	2.32857	4.08774	NO	Amidohydrolase 1; Metal-dependent hydrolase, composite
High	Obbri1_789441	14	9	22	8	105.2	2.11558	0.410241	3.61844	2.83696	5.95358	5.4184	YES	Amidohydrolase 1; Metal-dependent hydrolase, composite
High	Obbri1_789477	20	9	23	9	78	0.734597	0.461358	1.60246	3.22941	4.52522	5.46918	NO	Glycosyl hydrolase, family 13, catalytic region; Alpha-amylase, C-terminal all beta; Glycoside hydrolase, family 13, N-terminal; Glycosyl hydrolase, family 13, subfamily, catalytic region; Glycoside hydrolase, catalytic core; Immunoglobulin E-set
High	Obbri1_789529	64	16	137	16	29.3	14.8701	17.7917	15.0612	22.7061	23.7375	39.2705	NO	Short-chain dehydrogenase/reductase SDR; Glucose/ribitol dehydrogenase; NAD(P)-binding
High	Obbri1_789567	25	22	254	22	110.1	40.1312	32.9005	33.657	24.4065	62.4926	40.8632	YES	Glycoside hydrolase, family 35; Glycoside hydrolase, catalytic core
High	Obbri1_789588	48	22	158	22	58.3	14.0485	10.2748	17.7827	19.4012	31.4802	30.3831	NO	Glucose-6-phosphate dehydrogenase; Peptidase, cysteine peptidase active site; NAD(P)-binding
High	Obbri1_789603	6	3	7	3	59.5	2.35521	0.580277	1.69457	1.79338	0.857688	1.22946	NO
High	Obbri1_789632	54	7	64	7	19.1	4.32965	15.4549	9.74429	20.6266	7.02746	14.6619	NO	Translationally controlled tumour-associated TCTP; Mss4-like
High	Obbri1_789638	48	12	73	12	34.7	8.6184	8.10134	8.57522	12.6408	21.6828	25.3251	NO	Ribosomal protein L18/L5; Ribosomal protein L5, eukaryotic
High	Obbri1_789649	54	16	282	16	39.1	31.9122	26.3673	48.5969	82.3752	83.456	123.945	NO	Glutamine synthetase, catalytic region; Glutamine synthetase, beta-Grasp
High	Obbri1_789739	31	5	9	5	17	4.0634	1.46991	0.932069	0.265807	2.98127	1.62951	NO	Ribosomal protein S15; Ribosomal protein S13/S15, N-terminal; S15/NS1, RNA-binding
High	Obbri1_789780	13	2	3	2	45		1.13386					YES	Cellulose-binding region, fungal; Glycoside hydrolase, family 5; Glycoside hydrolase, catalytic core
High	Obbri1_789788	28	5	58	5	20.3	15.9211	9.36016	7.97197	5.45975	16.3175	11.4461	NO	Ribosomal protein L18ae
High	Obbri1_789805	44	12	104	12	37.8	8.12347	8.76299	6.91564	12.0098	15.9325	28.259	NO	GroES-related; Alcohol dehydrogenase, zinc-binding; Alcohol dehydrogenase GroES-like; Alcohol dehydrogenase, zinc-containing, conserved site; GroES-like; NAD(P)-binding
High	Obbri1_789834	31	14	53	14	79.3	18.4511	13.5245	21.106	20.183	39.4363	34.7813	NO	Prolyl-tRNA synthetase, class IIa; Aminoacyl-tRNA synthetase, class II (G, H, P and S); Anticodon-binding; YbaK/aminoacyl-tRNA synthetase associated region; Prolyl-tRNA synthetase, class II, C-terminal; Prolyl-tRNA synthetase, class IIa, prokaryotic-type; Aminoacyl-tRNA synthetase, class II; Prolyl-tRNA synthetase, class II
High	Obbri1_789842	9	5	10	5	85.2	6.99479	8.99675	5.77741	10.4142	7.66347	8.42582	NO	Glutamyl/glutaminyl-tRNA synthetase, class Ic; Glutathione S-transferase, C-terminal; Glutamyl-tRNA synthetase, class Ic, archaeal/eukaryotic cytosolic; Aminoacyl-tRNA synthetase, class I, conserved site; Glutathione S-transferase, C-terminal-like; Ribosomal protein L25/Gln-tRNA synthetase, anti-codon-binding
High	Obbri1_789859	21	3	20	3	27.5	1.71517	1.02227	2.64578	1.81822	4.41644	2.68829	NO	Fumarylacetoacetase, C-terminal-like; Fumarylacetoacetase, C-terminal-related
High	Obbri1_789939	29	7	51	7	41.2	1.46564	1.99724	3.96044	3.17294	6.44646	4.97112	NO	Autophagocytosis associated protein, N-terminal; Autophagocytosis associated protein, C-terminal; Calcium-binding EF-hand
High	Obbri1_789961	37	7	42	7	25.4	3.84735	4.27292	3.3104	4.53309	4.94925	6.80563	NO	20S proteasome, A and B subunits
High	Obbri1_789968	14	2	17	2	16	4.0761	4.26298	4.6297	3.75345	4.08667	3.42569	NO	Ribosomal protein S12/S23; Ribosomal protein S23, eukaryotic/archaeal; Nucleic acid-binding, OB-fold-like
High	Obbri1_790005	16	9	37	9	63.7	11.2108	4.94634	15.4757	6.30098	13.104	7.19243	NO	Peptidase M20; Peptidase M20, dimerisation; Peptidase M20, carboxypeptidase S; ArgE/DapE/ACY1/CPG2/YscS, conserved site; Pyridoxal phosphate-dependent transferase, major region
High	Obbri1_790045	39	11	45	11	39.7	0.516806	0.150337	1.29977	2.1982	12.8332	14.7189	NO	2OG-Fe(II) oxygenase
High	Obbri1_790090	18	8	23	8	83	1.23196	0.573872	1.57493	1.71691	2.20451	3.18632	NO	Aconitase/3-isopropylmalate dehydratase large subunit, alpha/beta/alpha; Aconitase A/isopropylmalate dehydratase small subunit, swivel; 3-isopropylmalate dehydratase, fused small/large subunits; 3-isopropylmalate dehydratase, large subunit region; 3-isopropylmalate dehydratase, small subunit region; Aconitase/3-isopropylmalate dehydratase, swivel
High	Obbri1_790121	39	11	61	11	29.6	14.0469	12.8359	11.8902	10.6525	13.2524	11.875	NO	Ribosomal protein S3Ae
High	Obbri1_790223	7	2	13	2	51.5	1.50139	2.35524	2.38917	5.13379	5.99696	14.8017	NO	SANT, DNA-binding
High	Obbri1_790232	5	2	11	2	63.5	3.02469	2.75757	1.64433	2.35897	4.56278	4.00579	NO	Aspartyl-tRNA synthetase, class IIb; Aminoacyl-tRNA synthetase, class II (D, K and N); Nucleic acid binding, OB-fold, tRNA/helicase-type; Asparaginyl-tRNA synthetase, class IIb; Aminoacyl-tRNA synthetase, class II; Nucleic acid-binding, OB-fold-like
High	Obbri1_790252	13	8	25	8	101.3	0.827544	0.860161	1.54507	1.60111	3.81501	2.81402	NO	Tetrahydrofolate dehydrogenase/cyclohydrolase; Formate-tetrahydrofolate ligase, FTHFS; NAD(P)-binding
High	Obbri1_790253	17	4	5	4	47.9	0.74307		1.2188	0.50017	2.88398	1.07173	NO	UBA/THIF-type NAD/FAD binding fold; Ubiquitin-activating enzyme repeat; E2 binding; Ubiquitin-activating enzyme, E1; Molybdenum cofactor biosynthesis
High	Obbri1_790274	17	2	13	2	18.5	1.08928	3.24375	0.879969	3.81246	0.764332	5.11788	NO	SKP1 component, dimerisation; SKP1 component, POZ; E3 ubiquitin ligase, SCF complex, Skp subunit; SKP1 component; BTB/POZ fold
High	Obbri1_790279	52	11	50	11	31.5	2.14622	2.19477	5.01604	11.5895	6.83618	13.6477	NO
High	Obbri1_790281	6	2	6	2	53.7	1.6128	0.118407	3.69765		7.68356	1.56801	NO	Glutamine synthetase, catalytic region; Glutamine synthetase, beta-Grasp
High	Obbri1_790347	11	4	33	4	71.4	4.59569	5.24406	2.42336	2.38635	3.47713	1.67541	YES	Alpha-L-arabinofuranosidase, C-terminal; Glycoside hydrolase, catalytic core
High	Obbri1_790433	21	6	39	6	56.8	4.62674	6.04856	8.68221	4.81282	20.796	5.98198	YES	Peptidase S10, serine carboxypeptidase
High	Obbri1_790443	66	39	725	39	72	433.16	383.834	124.189	140.719	124.013	163.364	NO	Glucose-methanol-choline oxidoreductase, N-terminal; Glucose-methanol-choline oxidoreductase, C-terminal; Glucose-methanol-choline oxidoreductase
High	Obbri1_790600	47	9	50	9	18	19.6681	23.0342	12.9849	17.2329	15.6402	25.0219	NO	Ribosomal protein S13; Ribosomal protein S13-like, H2TH
High	Obbri1_790601	29	23	125	23	106.1	5.14824	5.69888	3.81373	6.11728	7.23749	8.9785	NO	Alanyl-tRNA synthetase, class IIc; Phosphoesterase, DHHA1; Threonyl/alanyl tRNA synthetase, SAD
High	Obbri1_790641	42	10	74	10	37.6	14.5391	12.928	11.4689	12.0536	6.96057	9.95666	NO	NmrA-like; NAD(P)-binding
High	Obbri1_790671	7	2	7	2	59.6	1.63651	1.95281	1.45817	3.02295	3.13457	4.53411	NO	Chaperonin Cpn60; Chaperonin Cpn60/TCP-1; T-complex protein 1, epsilon subunit; Chaperonin TCP-1, conserved site; GroEL-like chaperone, ATPase
High	Obbri1_790685	21	7	109	7	65.5	32.8381	34.3798	39.4126	42.3561	50.9513	36.6578	YES	Peptidase S53, propeptide; Peptidase S8 and S53, subtilisin, kexin, sedolisin; Proteinase inhibitor, propeptide
High	Obbri1_790688	5	2	9	2	72.1	26.326	7.01093	38.3428	11.8065	52.7361	1.40031	NO	Protein kinase, core; Serine/threonine protein kinase-related; Tyrosine protein kinase; Serine/threonine protein kinase; Serine/threonine protein kinase, active site; Protein kinase-like
High	Obbri1_790711	11	5	18	5	63.3	2.9873	1.33159	5.81666	2.70957	6.69519	4.52945	NO	Malic oxidoreductase; Malic enzyme, N-terminal; Malic enzyme, NAD-binding; Malic enzyme, conserved site; NAD(P)-binding
High	Obbri1_790722	38	6	18	6	16	6.49882	4.48762	4.25982	3.16094	4.75419	3.75518	NO	Ribosomal protein L28e
High	Obbri1_790756	19	5	27	5	34.6	1.78194	2.80192	2.5293	3.58646	3.50113	4.63743	NO	Mov34-1; Mov34/MPN/PAD-1
High	Obbri1_790762	51	35	180	35	111.6	11.2226	6.86504	12.8073	8.42047	24.8464	16.2257	NO	Ubiquitin-activating enzyme, E1; UBA/THIF-type NAD/FAD binding fold; Ubiquitin-activating enzyme repeat; Molybdenum cofactor biosynthesis
High	Obbri1_790787	42	6	46	6	21.4	10.5187	6.62773	8.93152	9.00993	10.994	11.8418	NO	Ribosomal protein L6
High	Obbri1_790823	19	4	60	4	27.9	4.37337	6.20529	4.0444	7.57654	8.48301	10.6104	NO	20S proteasome, A and B subunits; Proteasome, beta-type subunit, conserved site
High	Obbri1_790840	29	7	30	7	41.2	3.54846	2.1001	2.77111	2.96544	2.99177	2.133	NO	Aldo/keto reductase
High	Obbri1_790850	32	16	76	16	64.6	8.54172	17.1286	6.89444	15.9463	9.94792	18.6139	NO	Thiamine pyrophosphate enzyme, central region; Thiamine pyrophosphate enzyme, C-terminal TPP-binding; Thiamine pyrophosphate enzyme, N-terminal TPP binding region
High	Obbri1_790860	19	2	18	2	18.3	3.08976	4.99413	3.23301	2.98694	3.10875	2.29771	YES	Superoxide dismutase, copper/zinc binding; Aldehyde dehydrogenase, conserved site
High	Obbri1_790883	16	4	9	4	50.9	1.41043	0.577509	1.99656	0.401546	2.94783	0.834186	NO	AAA ATPase, core; AAA+ ATPase, core; 26S proteasome subunit P45; AAA ATPase, conserved site
High	Obbri1_790891	51	30	401	30	83.1	57.0399	65.4739	57.0046	71.9689	45.9379	66.4821	NO	Peptidase S9, prolyl oligopeptidase active site region
High	Obbri1_790924	19	12	62	12	82.5	5.57648	4.27764	4.08708	5.89073	7.11702	9.79492	NO	Threonyl-tRNA synthetase, class IIa; Aminoacyl-tRNA synthetase, class II (G, H, P and S); TGS; Anticodon-binding; Threonyl/alanyl tRNA synthetase, SAD; Aminoacyl-tRNA synthetase, class II; TGS-like
High	Obbri1_790939	12	2	7	2	36.4	3.43781	2.69961	3.17234	5.18544	5.97764	7.86394	NO	NAD-dependent epimerase/dehydratase; NAD(P)-binding
High	Obbri1_790951	25	7	44	7	34.1	3.08564	14.4642	3.36371	20.0151	2.22393	17.7499	NO	NmrA-like; NAD(P)-binding
High	Obbri1_791027	78	16	416	16	28.1	73.2107	78.2685	127.67	174.763	94.6281	138.269	NO	Dienelactone hydrolase
High	Obbri1_791064	16	7	15	5	61.3	1.87191	3.30578		0.0566537	0.314951	0.341954	YES	Glycoside hydrolase, carbohydrate-binding; Glycoside hydrolase, family 15; Glycoside hydrolase 15-related; Glucan 1,4-alpha-glucosidase, starch-binding; Homeobox; Six-hairpin glycosidase-like; Carbohydrate-binding-like fold
High	Obbri1_791090	13	4	16	4	42.3	1.4468	0.6757	2.69065	1.1611	2.40701	1.16621	NO	Gelsolin; Gelsolin region
High	Obbri1_791100	55	12	81	12	32.6	9.41605	7.8752	18.871	21.4085	11.8749	16.5043	NO	Aldo/keto reductase
High	Obbri1_791109	9	4	19	4	58.5	5.17576	6.09708	4.91296	3.74046	5.14941	1.15858	YES	Glycoside hydrolase, catalytic core
High	Obbri1_791124	19	5	22	5	53.4	2.4495	1.91812	2.55944	3.60998	5.1036	9.50521	NO	Aminotransferase, class V/Cysteine desulphurase; Pyridoxal phosphate-dependent transferase, major region
High	Obbri1_791140	40	9	66	9	28.1	8.21768	7.31672	4.39479	5.47702	4.98034	6.76184	NO	Metal-dependent phosphohydrolase, HD region, subdomain; Cyanamide hydratase, HD-type
High	Obbri1_791141	24	3	13	3	23.4	2.7106	9.47622	3.88079	7.26899	2.91311	7.83856	NO	Glutathione S-transferase, C-terminal; Translation elongation factor EF1B, beta and delta chains, guanine nucleotide exchange; Inorganic pyrophosphatase; Translation elongation factor EF1B, beta/delta chains, conserved site; Glutathione S-transferase, C-terminal-like
High	Obbri1_791180	4	2	12	2	60.1	2.5396	1.47758	2.86125	2.05508	5.88324	4.46656	NO	Ubiquitin; Peptidase C19, ubiquitin carboxyl-terminal hydrolase 2
High	Obbri1_791213	20	2	7	2	15.2	2.84007	4.85825	3.90261	3.24171	1.79561	3.30003	YES	Peptidyl-prolyl cis-trans isomerase, FKBP-type
High	Obbri1_791294	27	14	61	14	98.1	4.78173	3.46482	4.13714	4.71732	11.463	9.59255	NO	N-acetyl-gamma-glutamyl-phosphate reductase; Aspartate/glutamate/uridylate kinase; Semialdehyde dehydrogenase, NAD-binding; Semialdehyde dehydrogenase, dimerisation region; Protein of unknown function DUF619; NAGK-NAGSA, bifunctional; Acetylglutamate kinase; NAD(P)-binding
High	Obbri1_791314	19	7	34	7	61.2	1.82001	2.56218	2.13216	3.75909	4.23439	6.36126	YES	Prenylcysteine lyase; FAD-dependent pyridine nucleotide-disulphide oxidoreductase
High	Obbri1_791414	9	3	21	3	38.4	3.16168	2.97224	4.20621	6.32477	5.75866	6.94255	NO	Methyltransferase type 11
High	Obbri1_791447	67	18	210	18	35.5	24.7165	21.7804	28.4932	45.8734	32.4532	38.0463	YES	Aldo/keto reductase
High	Obbri1_791578	38	5	26	5	20.5	1.26828	1.37929	2.24492	3.72332	4.65022	5.3315	NO	ARF/SAR superfamily; Ras GTPase; Ras small GTPase, Rab type; ADP-ribosylation factor; GTP-binding protein SAR1; Small GTP-binding protein
High	Obbri1_791602	12	3	15	3	41.7	1.44583	2.96996	3.96602	3.68585	3.05791	3.01986	NO	Activator of Hsp90 ATPase homologue 1-like; Activator of Hsp90 ATPase, N-terminal
High	Obbri1_791710	20	4	41	3	19.6		0.797859	0.534862	1.18118		2.59782	NO	Peptidyl-prolyl cis-trans isomerase, cyclophilin-type; Cyclophilin-like
High	Obbri1_791755	49	12	80	12	37.3	5.88924	6.46752	15.6896	15.9343	5.93444	5.74853	NO	Alpha/beta hydrolase fold-3
High	Obbri1_791757	55	14	123	13	37	10.3078	10.4844	20.492	17.6649	22.7802	25.1216	NO	Alpha/beta hydrolase fold-3
High	Obbri1_791820	8	3	22	3	59.4	1.77375	2.35166	2.86326	3.64929	3.6971	2.59757	NO	Protein phosphatase 2C, N-terminal; Protein phosphatase 2C-related; Protein phosphatase 2C, manganese/magnesium aspartate binding site
High	Obbri1_791838	16	4	12	4	43.2	3.20546	1.94295	3.51156	2.87019	6.88628	5.49835	NO	tRNA-binding region; Glutathione S-transferase, C-terminal-like; Nucleic acid-binding, OB-fold-like
High	Obbri1_791889	64	13	102	13	32.4	10.6324	9.03749	42.0788	52.0135	37.4695	66.8995	YES	Lactate/malate dehydrogenase; NAD(P)-binding
High	Obbri1_792000	22	5	33	5	30.7	1.69618	2.17128	2.53638	4.4559	2.32866	3.25271	NO	High mobility group box, HMG1/HMG2; High mobility group box, HMG
High	Obbri1_792110	21	8	42	5	43.2	1.16091	20.5948	1.84755	3.75732	2.63394	2.75386	NO	Aldo/keto reductase
High	Obbri1_792191	33	6	106	6	18.1	20.6627	27.4447	24.8366	44.8938	30.4293	46.1732	NO	Ubiquitin; Ribosomal protein S27a
High	Obbri1_792282	55	23	173	23	63.5	15.2538	15.2175	22.2824	26.6829	31.3824	36.6446	NO	Dihydroxy-acid and 6-phosphogluconate dehydratase; Dihydroxy-acid dehydratase
High	Obbri1_792330	52	15	103	15	40.2	7.79017	7.74882	5.83589	8.67905	11.6427	20.3581	NO	Thiolase; Regulator of chromosome condensation, RCC1; Thiolase-like
High	Obbri1_792360	11	5	17	3	53.3	1.06213	2.90886	1.48439	4.39116	1.36588	4.88567	NO	Homogentisate 1,2-dioxygenase; Cupin, RmlC-type
High	Obbri1_792403	38	4	15	4	17.4	0.0645923	2.67551		3.80868		4.27533	NO	KOW; Eukaryotic initiation factor 5A hypusine (eIF-5A); Translation protein SH3-like; Nucleic acid-binding, OB-fold-like
High	Obbri1_792409	6	2	7	2	42.2	0.890009	0.209116	1.86843	0.416165	3.9958	0.545901	NO	DAHP synthetase I/KDSA; DHAP synthase, class 1
High	Obbri1_792492	28	5	26	5	34.4	0.295612	0.566126	2.89832	2.90998	5.83752	5.50061	NO	Thiamine biosynthesis Thi4 protein
High	Obbri1_792519	41	22	157	22	84.4	10.4325	9.05522	8.69402	9.3719	15.5959	18.4661	NO	Peptidase M3A and M3B, thimet/oligopeptidase F; Peptidase M, neutral zinc metallopeptidases, zinc-binding site
High	Obbri1_792576	26	10	56	9	55.8	4.76356	3.96742	5.16729	5.94706	6.68421	7.52574	NO	Amidase signature enzyme
High	Obbri1_792646	24	6	27	6	36.9	1.97284	2.14793	3.54122	5.63355	5.19788	5.98798	NO	Aldo/keto reductase
High	Obbri1_792666	33	9	65	9	30.7	4.51426	8.43763	8.3147	11.6198	7.62033	10.6431	NO	FMN-binding split barrel, related
High	Obbri1_792686	23	9	59	9	79.8	3.57591	4.20164	8.11509	8.67376	18.815	16.5445	NO	Neutral/alkaline nonlysosomal ceramidase
High	Obbri1_792737	3	5	7	5	189.3	0.842416	0.381029	0.466917	1.18112	0.205659	3.21853	NO	Clathrin, heavy chain/VPS, 7-fold repeat; Clathrin, heavy chain, propeller, N-terminal; Clathrin, heavy chain, linker, core motif; Clathrin, heavy chain; Actinin-type, actin-binding, conserved site; Armadillo-type fold
High	Obbri1_792790	16	10	34	9	90.7	1.27271	1.97255	2.21383	3.27128	4.811	6.37379	YES	Heat shock protein Hsp90; ATP-binding region, ATPase-like; Carbamoyl phosphate synthetase, large subunit, ATP-binding
High	Obbri1_792863	13	6	10	5	65.4	3.71596	0.563623	0.580552	0.359206	1.54285	0.367314	NO	Glucose-methanol-choline oxidoreductase, N-terminal; Glucose-methanol-choline oxidoreductase, C-terminal; Glucose-methanol-choline oxidoreductase
High	Obbri1_792902	17	6	17	6	71.3	1.7572	2.10203	1.58823	2.29441	15.1548	2.77769	YES	Peptidase S53, propeptide; Peptidase S8 and S53, subtilisin, kexin, sedolisin; Proteinase inhibitor, propeptide
High	Obbri1_792932	15	5	11	5	47.6	1.42577	0.971532	1.17298	0.933657	2.71829	3.70513	NO	Protein of unknown function DUF1688
High	Obbri1_792947	18	4	19	4	38.2	2.04298	2.15113	2.62375	2.70658	3.83571	5.19624	NO	Alpha/beta hydrolase fold-3
High	Obbri1_793034	24	8	56	8	51	13.5432	11.8444	10.9885	12.4097	17.1857	23.7078	NO	Peptidase M18, aminopeptidase I
High	Obbri1_793058	46	5	15	5	13.4	11.6778	1.50264	2.84037	0.935355	2.53025	0.886565	NO	Macrophage migration inhibitory factor
High	Obbri1_793107	9	3	15	3	42.2	5.79891	4.11527	2.64476	1.29692	3.90283	1.47698	YES	Peptidase A1; Peptidase aspartic, active site; Peptidase aspartic, catalytic
High	Obbri1_793161	34	14	60	13	56.5	9.77833	4.90069	11.4102	7.1155	13.5875	7.8364	NO	Cytochrome b5; FMN-dependent alpha-hydroxy acid dehydrogenase; FMN-dependent alpha-hydroxy acid dehydrogenase, active site
High	Obbri1_793184	19	3	27	3	28	1.12402	0.558136	6.14439	7.23741	10.902	9.63078	NO	Dienelactone hydrolase
High	Obbri1_793230	42	8	47	8	26.7	10.6114	10.5852	8.08942	9.16231	2.72444	16.0106	NO	20S proteasome, A and B subunits; Proteasome alpha-subunit, conserved site
High	Obbri1_793293	55	12	227	12	34.3	39.6162	41.3401	52.9349	81.7792	57.8224	135.05	NO	Short-chain dehydrogenase/reductase SDR; Glucose/ribitol dehydrogenase; NAD(P)-binding
High	Obbri1_793311	56	15	166	15	25.9	142.859	110.702	80.807	84.2313	41.8286	38.8708	NO	Glutathione S-transferase, C-terminal; Glutathione S-transferase, N-terminal; Glutathione S-transferase, C-terminal-like; Thioredoxin-like fold
High	Obbri1_793325	49	13	107	13	36.7	18.043	15.2315	18.7582	19.2738	16.1422	19.3981	NO	Alcohol dehydrogenase, zinc-binding; Alcohol dehydrogenase GroES-like; Quinone oxidoreductase putative, PIG3; GroES-like; NAD(P)-binding
High	Obbri1_793416	33	10	61	10	44.3	10.2424	8.51947	10.5887	11.7388	19.3481	18.8378	NO	Acetohydroxy acid isomeroreductase C-terminal; Acetohydroxy acid isomeroreductase, catalytic; Ketol-acid reductoisomerase, fungi; Acetohydroxy acid isomeroreductase; 6-phosphogluconate dehydrogenase, C-terminal-like; NAD(P)-binding
High	Obbri1_793535	21	7	46	7	37.7	6.57543	5.22891	4.37828	3.61333	9.87279	12.2977	NO	Alcohol dehydrogenase, zinc-binding; Alcohol dehydrogenase GroES-like; GroES-like; NAD(P)-binding
High	Obbri1_793545	19	10	30	10	72.6	2.27051	0.442326	2.44872	1.76202	5.17982	3.11768	NO	AMP-dependent synthetase and ligase; Acetate--CoA ligase
High	Obbri1_793587	40	20	141	19	47.2	12.3284	15.7449	11.3942	21.3888	22.3115	37.5866	NO	Translation elongation factor EF1B, gamma chain, conserved; Glutathione S-transferase, C-terminal; Glutathione S-transferase, N-terminal; Glutathione S-transferase, C-terminal-like; Thioredoxin-like fold
High	Obbri1_793766	8	6	15	6	119.4	2.24293	0.325148	0.397096	0.88651	1.09934	1.871	NO	Valyl-tRNA synthetase, class Ia; Aminoacyl-tRNA synthetase, class Ia; Valyl/Leucyl/Isoleucyl-tRNA synthetase, class I, anticodon-binding; Aminoacyl-tRNA synthetase, class I, conserved site; tRNA-binding arm; Aminoacyl-tRNA synthetase, class 1a, anticodon-binding; Valyl/Leucyl/Isoleucyl-tRNA synthetase, class Ia, editing
High	Obbri1_793774	40	16	99	14	56.5	59.7871	28.5498	20.6532	18.4815	20.9517	29.3545	NO
High	Obbri1_793788	32	12	50	12	59.4	4.43089	0.951107	7.89202	5.42681	15.8712	14.8725	NO	Peptidase M24, catalytic core; Peptidase M24B, X-Pro dipeptidase/aminopeptidase P, conserved site
High	Obbri1_793817	41	10	56	8	46	4.36739	3.06464	4.25255	4.01794	10.3312	11.1871	NO	NADH:flavin oxidoreductase/NADH oxidase, N-terminal
High	Obbri1_793819	22	5	39	5	39.8	3.56163	3.01028	3.82209	4.98499	4.29047	6.56645	NO	Coproporphyrinogen III oxidase
High	Obbri1_793863	37	8	27	8	37	4.41477	3.38353	3.50917	2.38309	4.46981	4.9529	NO	D-isomer specific 2-hydroxyacid dehydrogenase, catalytic region; D-isomer specific 2-hydroxyacid dehydrogenase, NAD-binding; NAD(P)-binding
High	Obbri1_793930	1	2	10	2	93.8		24.1855		7.18651		7.56314	NO
High	Obbri1_793946	12	4	9	4	44.3	5.80386	2.47227	4.30018	3.36603	6.54389	4.04122	NO	Actin/actin-like
High	Obbri1_793973	10	4	8	4	44.2	1.25448	0.606575	2.39176	2.54104	3.78232	2.0697	NO	Taurine catabolism dioxygenase TauD/TfdA
High	Obbri1_794110	56	15	263	15	40.8	27.9852	19.0381	59.5816	43.1597	60.9897	53.154	NO	Acetamidase/Formamidase
High	Obbri1_794116	31	13	50	13	72.5	2.77265	3.71778	2.96545	6.18779	4.41318	6.29504	NO	Calponin-like actin-binding; Actinin-type, actin-binding, conserved site; Calponin-homology
High	Obbri1_794164	14	2	6	2	26	0.967609	3.38673	0.64084	2.54773	1.25286	1.80263	NO	Pyridoxamine 5'-phosphate oxidase-related, FMN-binding core; FMN-binding split barrel, related
High	Obbri1_794242	28	10	40	10	54.9	1.55248	0.996437	3.64542	3.89232	9.49866	11.1879	NO
High	Obbri1_794250	17	6	39	6	56.9	6.2555	9.47287	13.149	21.1771	12.3275	22.0163	YES	Peptidase S10, serine carboxypeptidase
High	Obbri1_794283	15	2	5	2	21.1			0.402589		0.346148		NO	Calcium-binding EF-hand
High	Obbri1_794387	15	3	9	3	33.2	1.17228	0.852147	0.833833	0.986962	1.78018	3.90137	NO	Glutathione S-transferase, C-terminal-like; Thioredoxin-like fold
High	Obbri1_794401	46	9	57	9	29.2	3.55801	7.52953	7.86576	9.08818	7.57001	9.47914	NO	Mitochondrial glycoprotein
High	Obbri1_794404	8	4	11	4	79.4	4.03862	2.69402	2.26337	1.34388	4.52571	12.6144	NO
High	Obbri1_794419	28	9	39	7	49.8	3.63977	1.22845	7.60669	3.42919	20.5525	8.62224	NO	1-aminocyclopropane-1-carboxylate synthase; Aminotransferase, class I and II; Aminotransferases, class-I, pyridoxal-phosphate-binding site; Pyridoxal phosphate-dependent transferase, major region
High	Obbri1_794422	57	12	21	12	31	0.14179	0.480204	0.968077	2.44746	5.69387	5.11603	NO	Short-chain dehydrogenase/reductase SDR; Glucose/ribitol dehydrogenase; Sugar transporter, conserved site; NAD(P)-binding
High	Obbri1_794466	10	2	4	2	58.1		0.269371		0.539844		1.5811	NO	Carboxylesterase, type B
High	Obbri1_794503	36	11	68	11	51.5	6.49764	5.8524	3.39319	5.01874	7.38288	7.13243	NO	Mandelate racemase/muconate lactonizing enzyme, C-terminal; Mandelate racemase/muconate lactonizing enzyme, N-terminal; Mandelate racemase/muconate lactonizing enzyme
High	Obbri1_794536	47	6	26	6	23.1	2.9123	3.90306	3.45676	5.43384	5.28017	7.35009	NO	20S proteasome, A and B subunits; Proteasome, beta-type subunit, conserved site
High	Obbri1_794540	72	27	470	18	35.9	172.298	162.928	101.918	150.213	100.45	158.867	NO	Transaldolase; Transaldolase AB
High	Obbri1_794699	12	5	24	5	42.1	4.51987	6.05015	3.5784	6.40471	8.1021	6.52236	YES	Lipase, GDSL; Esterase, SGNH hydrolase-type
High	Obbri1_794811	13	9	15	7	104.9	1.01132	2.55438	1.13372	2.74752	4.98543	2.50184	NO	Amidohydrolase 3; Metal-dependent hydrolase, composite
High	Obbri1_794984	25	6	19	5	37.5	3.84029	1.55036	5.9507	1.7895	5.14589	1.39778	NO	Alcohol dehydrogenase, zinc-binding; Alcohol dehydrogenase GroES-like; GroES-like; NAD(P)-binding
High	Obbri1_795063	41	11	61	11	43.6	3.59708	14.2395	14.9458	33.9512	19.1067	36.5479	NO	Taurine catabolism dioxygenase TauD/TfdA
High	Obbri1_795134	66	8	176	8	25.9	64.7382	53.5101	79.8902	83.6064	93.6009	106.312	NO	Flavodoxin/nitric oxide synthase; Flavoprotein WrbA
High	Obbri1_795220	26	9	44	9	47.1	5.38335	7.53302	7.58732	7.18777	10.337	8.32281	NO	Peptidase A1; Peptidase aspartic, catalytic
High	Obbri1_795290	55	10	45	8	26.4	2.68192	1.8191	5.32162	6.69573	8.80205	10.867	NO	Glutathione S-transferase, N-terminal; Glutathione S-transferase, C-terminal-like; Thioredoxin-like fold
High	Obbri1_795308	24	5	10	5	44.3	1.3133	0.394381	2.01481	0.751121	4.19238	1.74459	NO	Chorismate synthase
High	Obbri1_795336	21	2	5	2	24.8	0.772605		1.48227		0.48633		NO	Thiopurine S-methyltransferase
High	Obbri1_795358	48	11	42	11	31	5.37748	4.78263	5.38123	6.92	10.7537	10.0145	NO
High	Obbri1_795365	15	3	16	3	43.9	2.09282	1.87513	1.79179	2.91529	6.01443	2.39323	YES	Peptidase M28
High	Obbri1_795506	36	20	102	20	86.3	5.46359	7.46053	5.78166	10.2397	11.005	13.3999	NO	Heat shock protein 70; Heat shock protein Hsp70
High	Obbri1_795558	12	4	8	4	59.2	0.689155	0.492006	1.04604	1.35992	3.19129	3.17343	YES	Aromatic-ring hydroxylase; Monooxygenase, FAD-binding; Thioredoxin-like fold
High	Obbri1_795594	19	4	20	4	37.1	2.78547	1.82463	4.89613	5.28766	8.38568	10.0666	NO	Methyltransferase type 11
High	Obbri1_795610	14	8	22	8	73.1	1.14789	4.33229	1.64462	4.44	3.46276	5.63513	NO	Glycyl-tRNA synthetase, alpha2 dimer; Aminoacyl-tRNA synthetase, class II (G, H, P and S); Anticodon-binding; Aminoacyl-tRNA synthetase, class II
High	Obbri1_795682	13	3	8	3	48	1.38638	2.28237	1.10566	1.64579	2.59949	4.32509	NO	Tyrosyl-tRNA synthetase, class Ib, bacterial/mitochondrial; Aminoacyl-tRNA synthetase, class Ib; Tyrosine tRNA ligase, archaeal/eukaryotic
High	Obbri1_795749	23	9	53	9	43.7	6.20031	6.57959	5.19135	9.20958	9.12625	13.7301	NO	Ribosomal protein L3; Translation elongation and initiation factors/Ribosomal, beta-barrel
High	Obbri1_795757	20	5	30	5	34	4.70464	4.81274	6.24287	6.94026	3.65533	4.9369	NO	Epoxide hydrolase-like; Peptidase S33, prolyl aminopeptidase; Alpha/beta hydrolase fold-1; Peptidase S33, tricorn interacting factor 1
High	Obbri1_795760	30	11	71	11	53.5	11.8316	13.0123	9.57606	13.6525	12.0642	16.5598	NO	Iron-containing alcohol dehydrogenase
High	Obbri1_795787	6	2	8	2	46.1	0.32678	1.182	0.175504	1.27948	0.386415	1.27332	NO	Ubiquitin system component Cue; UBA-like
High	Obbri1_795851	13	3	8	3	35.3	5.02091	4.52408	0.137329	0.724672		0.973586	YES	NmrA-like; NAD(P)-binding
High	Obbri1_796118	28	5	14	5	18.7	1.918	1.51533	3.17514	4.27519	3.32464	2.06336	NO	STAT transcription factor, coiled coil
High	Obbri1_796119	23	3	17	3	15	0.691299	3.081	0.668263	2.93873	1.14795	2.49695	NO	Methionine sulphoxide reductase B; Mss4-like
High	Obbri1_796125	12	4	16	4	51.2	0.824167	0.866166	1.5183	1.383	3.23971	2.31674	NO	Protein phosphatase 2A, regulatory subunit PR55; WD40 repeat; WD40 repeat-like
High	Obbri1_796133	15	5	20	5	48.2	5.19225	2.0306	5.3579	2.55443	5.23995	2.90313	YES	Thioredoxin-related; Thioredoxin domain; Thioredoxin-like fold
High	Obbri1_796164	39	7	39	7	27.2	7.41314	4.51571	15.1094	13.0972	11.4655	12.8719	NO	Dimeric alpha-beta barrel
High	Obbri1_796233	10	3	11	3	47	2.17569	1.87981	2.30093	2.01641	3.97011	3.24409	NO	NAD(P)-binding
High	Obbri1_796236	48	9	47	9	29.5	6.90105	5.19578	8.35133	9.78156	11.8359	14.2522	NO	20S proteasome, A and B subunits; Proteasome alpha-subunit, conserved site
High	Obbri1_796307	35	6	43	6	36.8	5.97027	5.84437	9.4073	10.4081	13.2609	13.3404	NO	Pyridine nucleotide-disulphide oxidoreductase, NAD-binding region; FAD-dependent pyridine nucleotide-disulphide oxidoreductase; Adrenodoxin reductase; Pyridine nucleotide-disulphide oxidoreductase, class-II; Thioredoxin reductase; Pyridine nucleotide-disulphide oxidoreductase, class-II, active site
High	Obbri1_796335	44	8	55	8	17.5	17.8836	13.2994	11.671	8.4055	8.67458	9.87679	NO	Ribosomal protein S19e
High	Obbri1_796367	45	13	112	5	39.2	5.29704	10.0435	3.3616	8.62264	5.14022	10.2655	NO	Aldo/keto reductase
High	Obbri1_796371	58	15	113	14	39.3	16.1392	13.8001	21.3468	26.491	29.9107	36.4407	NO	Aldo/keto reductase
High	Obbri1_796403	27	9	40	9	57	1.92543	2.16855	2.29618	2.79762	4.26752	3.24053	NO	Proteasome component region PCI; 26S proteasome regulatory subunit, C-terminal; PCI/PINT associated module
High	Obbri1_796407	18	7	85	7	58.7	2.87686	3.10171	10.009	9.31359	64.7656	18.6287	YES	Glycoside hydrolase, family 47
High	Obbri1_796478	58	22	119	22	52.3	13.118	10.8207	15.7982	18.8063	23.3919	34.7516	NO	Peptidase M20; Peptidase M20, dimerisation; Glutathione degradosome, DUG1; ArgE/DapE/ACY1/CPG2/YscS, conserved site
High	Obbri1_796494	49	12	120	12	31.9	10.1498	11.7097	10.2509	14.6032	13.8499	23.5544	NO	Crotonase, core
High	Obbri1_796504	16	5	9	5	44	0.474134	1.67979	1.54151	2.90678	0.805215	1.09552	NO	Zinc finger, PARP-type
High	Obbri1_796517	29	4	19	4	14.2	6.94932	8.20769	5.48147	8.39604	5.65972	6.82347	NO	Ribosomal protein S26e
High	Obbri1_796527	10	4	12	4	51	0.854795	1.65891	1.26352	2.9345	1.24602	3.15208	NO	Aromatic-ring hydroxylase; FAD dependent oxidoreductase
High	Obbri1_796626	22	4	9	4	20.1	1.7284	2.1937	1.07788	1.50205	0.772661	1.11538	NO	3-hydroxyanthranilic acid dioxygenase; Cupin, RmlC-type
High	Obbri1_796636	13	2	6	2	38.7	1.26	1.8778	1.16826	2.46912	1.36395	3.1392	NO	S1, RNA binding; Eukaryotic translation initiation factor 2, alpha subunit; Nucleic acid-binding, OB-fold-like
High	Obbri1_796650	48	10	32	10	25	4.42556	7.1075	3.84045	9.26855	6.25236	11.5628	NO	Ribosomal protein L10e; Ribosomal protein L10e/L16
High	Obbri1_796655	59	13	205	11	26.5	42.7745	38.1526	78.2485	84.8403	59.9377	95.0737	NO	Glutathione S-transferase, N-terminal; Glutathione S-transferase, C-terminal-like; Thioredoxin-like fold
High	Obbri1_796674	15	3	10	3	25.3	0.60804	2.55763	0.553969	1.65477	2.31784	3.78344	NO	Thymidylate kinase
High	Obbri1_796706	18	8	30	8	68.1	2.74699	1.32207	4.14052	2.67364	5.7409	4.39835	NO	FAD-dependent pyridine nucleotide-disulphide oxidoreductase
High	Obbri1_796717	31	17	79	17	86.1	6.80636	6.61843	6.34712	6.95038	9.27191	10.1662	NO	WD40 repeat; PUL; PFU (PLAA family ubiquitin binding); WD40 repeat-like
High	Obbri1_796760	12	3	13	3	31.6	0.801822	4.73834	1.20939	5.48703	2.21253	6.53801	NO	Short-chain dehydrogenase/reductase SDR; Glucose/ribitol dehydrogenase; NAD(P)-binding
High	Obbri1_796772	17	5	14	5	50.6	0.214803	1.94291	0.954612	7.79072	2.06783	7.1193	NO	RNA recognition motif, RNP-1; Nuclear transport factor 2; Peptidase S8 and S53, subtilisin, kexin, sedolisin
High	Obbri1_796825	15	9	27	9	72.5	7.6911	6.66668	5.7451	5.0185	7.71302	5.80674	YES	Carboxylesterase, type B
High	Obbri1_796835	23	2	39	2	25	11.0733	16.6723	16.3356	32.494	26.4024	17.3049	YES	Glycoside hydrolase, family 61
High	Obbri1_796837	52	10	99	9	23	24.6037	24.3501	16.6448	21.1487	15.5551	23.8196	NO	Manganese and iron superoxide dismutase
High	Obbri1_796894	22	7	28	1	41.4							NO	Isopenicillin N synthase; 2OG-Fe(II) oxygenase
High	Obbri1_796896	54	14	65	8	41.2	0.379549	2.4201	9.95905	12.097	8.84269	17.4248	NO	Isopenicillin N synthase; 2OG-Fe(II) oxygenase
High	Obbri1_796953	6	2	9	2	49.5	1.92917	2.15967	1.01168	1.89344	2.26671	4.54493	NO	Thiolase; Thiolase-like
High	Obbri1_797053	50	28	235	27	84.1	18.7941	22.0947	24.6086	31.3056	36.4823	50.3601	NO	Aconitase/3-isopropylmalate dehydratase large subunit, alpha/beta/alpha; Aconitase A/isopropylmalate dehydratase small subunit, swivel; Aconitase, mitochondrial-like; Aconitase/3-isopropylmalate dehydratase, swivel
High	Obbri1_797088	7	2	15	2	51.8	3.57352	2.53945	2.86257	3.64964	3.82472	3.50081	NO	FAD dependent oxidoreductase
High	Obbri1_797110	26	6	35	6	33.8	3.3723	2.80336	3.14765	3.46449	6.14442	5.84639	NO	Short-chain dehydrogenase/reductase SDR; Glucose/ribitol dehydrogenase; NAD(P)-binding
High	Obbri1_797114	46	5	32	5	18.2	3.69613	5.67859	3.43989	5.9236	4.32817	5.31457	NO	Nascent polypeptide-associated complex NAC
High	Obbri1_797115	26	11	29	11	65.2	11.2728	2.23698	9.8073	3.81499	12.2479	6.62076	NO	WD40 repeat; WD40 repeat-like
High	Obbri1_797149	65	14	103	14	47.5	6.26977	7.61286	7.31545	7.41636	7.97941	11.632	YES	Aldose 1-epimerase; Glycoside hydrolase-type carbohydrate-binding
High	Obbri1_797153	19	9	53	8	67.6	32.5517	3.73818	34.9058	4.92641	34.3273	7.9052	NO
High	Obbri1_797253	36	8	39	8	28	4.10438	6.09827	4.42014	4.05694	4.54005	3.78907	NO	Ribosomal protein S5, N-terminal; Ribosomal protein S5, C-terminal; Ribosomal protein S5, eukaryotic/archaeal
High	Obbri1_797323	29	4	18	4	15.5	37.3562	39.372	18.0661	17.8457	23.2051	25.1552	NO	KOW; Ribosomal protein L14
High	Obbri1_797401	26	6	48	6	37.7	4.72315	4.8191	6.25932	8.12279	8.31725	15.5377	NO	Epoxide hydrolase-like; Alpha/beta hydrolase fold-1
High	Obbri1_797438	48	12	67	12	37.3	15.0782	10.2383	8.27318	4.77163	5.97629	5.4696	NO
High	Obbri1_797572	50	15	65	15	50.8	2.3738	1.80426	4.20535	2.96752	18.7513	5.64138	NO	NADH:flavin oxidoreductase/NADH oxidase, N-terminal
High	Obbri1_797586	5	2	8	2	57.5	0.551699	0.889686	0.349652	0.959548	0.891998	0.760158	NO	RNA recognition motif, RNP-1
High	Obbri1_797590	16	3	8	3	25.9	0.711549	3.651	0.350061	2.48403	0.206694	2.65633	NO	Cupin 2, conserved barrel; Cupin, RmlC-type
High	Obbri1_797651	46	4	29	4	15.4	3.51129	3.67654	4.1274	4.4739	5.52414	5.63296	NO	Actin-binding, cofilin/tropomyosin type
High	Obbri1_797662	5	2	5	2	70.4	3.74211	4.53431	0.367472	0.715737	3.26376	0.508437	NO	Acyltransferase ChoActase/COT/CPT
High	Obbri1_797671	25	6	44	6	20.1	10.733	14.2847	6.93736	12.5147	12.3902	18.5963	NO	Ribosomal protein L5
High	Obbri1_797781	9	3	11	3	51.9	5.11678	4.01833	6.11156	5.46336	9.20782	7.70132	NO	Aminotransferase, class I and II; Pyridoxal phosphate-dependent transferase, major region
High	Obbri1_797782	16	4	20	4	51.9	3.63718	3.59936	1.58074	2.11068	3.0562	2.53797	NO	Pyruvate carboxyltransferase
High	Obbri1_797815	38	8	64	8	37.1	5.41323	3.48806	4.88393	4.55052	11.9988	6.64742	NO	2-nitropropane dioxygenase, NPD
High	Obbri1_797934	26	5	22	5	32.1	1.32419	2.8839	1.44015	3.53311	4.9161	5.76833	YES	D-isomer specific 2-hydroxyacid dehydrogenase, NAD-binding; Phosphogluconate dehydrogenase, NAD-binding, putative, C-terminal; 6-phosphogluconate dehydrogenase, C-terminal-like; NAD(P)-binding
High	Obbri1_797971	22	4	11	4	28.1	2.2983	0.750116	1.41321	0.648681	1.97676	0.861757	NO	Calponin-like actin-binding; EB1, C-terminal; Calponin-homology
High	Obbri1_797998	12	2	6	2	25.7	0.499868	0.520686	0.917255	1.89501	1.72625	3.98475	NO	Glutathione S-transferase, C-terminal; Glutathione S-transferase, N-terminal; Glutathione S-transferase, C-terminal-like; Thioredoxin-like fold
High	Obbri1_798023	57	17	398	16	36	165.542	131.892	265.329	274.64	226.625	235.171	NO	Alcohol dehydrogenase, zinc-binding; Alcohol dehydrogenase GroES-like; GroES-like; NAD(P)-binding
High	Obbri1_798079	69	20	245	14	41.7	34.3418	35.3507	61.8921	59.047	88.7529	80.0209	NO	Actin/actin-like; Actin, conserved site
High	Obbri1_798135	29	5	19	2	25.7	1.44369	0.862176	1.46026	1.0556	2.92889	1.58799	NO	Glucose/ribitol dehydrogenase; Short-chain dehydrogenase/reductase SDR; NAD(P)-binding
High	Obbri1_798228	14	5	8	5	71.9	0.978687	1.97316	1.27799	2.89332	1.49888	4.18754	NO	Peptidase S9, prolyl oligopeptidase active site region
High	Obbri1_798236	9	3	9	2	57.1	0.781122	0.407957	1.44391	2.09014	1.22774	2.30573	NO
High	Obbri1_798326	49	25	163	25	71.8	13.6234	15.0127	11.1656	13.3651	17.3555	19.6128	NO	Peptidase M24, catalytic core; Creatinase
High	Obbri1_798341	36	4	18	4	15.9	1.96284	1.45729	5.12149	7.76932	6.26757	11.0089	NO	Glyoxalase/bleomycin resistance protein/dioxygenase; Glyoxalase I
High	Obbri1_798395	8	4	9	4	76.4	13.2387	30.167	6.42358	15.9439	6.17562	16.3301	NO	Dynamin, GTPase region; Dynamin central region; Dynamin GTPase effector
High	Obbri1_798451	8	4	6	4	84.4	0.382838	0.287963	0.699364	0.57991	1.29764	1.42552	NO	Hydantoinase/oxoprolinase; Hydantoinaseoxoprolinase, N-terminal
High	Obbri1_798496	41	13	96	13	35.9	24.8474	20.1982	20.7507	20.6738	15.129	22.4802	NO	Tetrapyrrole biosynthesis, porphobilinogen synthase
High	Obbri1_798569	33	5	10	5	34.1	1.0249	0.118744	0.87486	0.914972	0.412526	1.5379	NO
High	Obbri1_798619	72	22	285	22	49.9	12.7127	16.7802	22.1227	34.7051	33.9039	46.8559	NO	Tubulin; Beta tubulin; Tubulin/FtsZ, GTPase; Tubulin/FtsZ, C-terminal; Beta tubulin, autoregulation binding site
High	Obbri1_798678	13	4	13	4	37.7	3.77985	1.41153	4.0572	1.70646	5.63548	3.72531	NO	Protein of unknown function DUF453
High	Obbri1_798696	28	8	28	8	36.6	6.21948	3.79331	3.38201	1.18267	3.18038	2.75308	NO	Alcohol dehydrogenase, zinc-binding; Alcohol dehydrogenase GroES-like; Quinone oxidoreductase/zeta-crystallin, conserved site; GroES-like; NAD(P)-binding
High	Obbri1_798719	14	5	23	5	51.7	0.762338	3.58698	1.25606	3.67527	2.94507	6.36693	NO	Aldehyde dehydrogenase; Aldehyde dehydrogenase, conserved site; Aldehyde/histidinol dehydrogenase
High	Obbri1_798804	39	10	64	10	38.5	3.59864	2.95953	11.1595	13.6688	8.68645	11.9697	NO	Alcohol dehydrogenase, zinc-binding; Alcohol dehydrogenase GroES-like; GroES-like; NAD(P)-binding
High	Obbri1_798818	45	19	121	19	47.1	9.90344	11.9072	28.9791	25.2932	42.6995	35.5888	NO	S-adenosyl-L-homocysteine hydrolase, NAD binding; S-adenosyl-L-homocysteine hydrolase; NAD(P)-binding
High	Obbri1_798903	7	2	8	2	59.8	0.690622	0.708946	1.04147	0.792226	1.66042	1.3133	NO	Chaperonin Cpn60; Chaperonin Cpn60/TCP-1; T-complex protein 1, zeta subunit; Chaperonin TCP-1, conserved site; GroEL-like chaperone, ATPase
High	Obbri1_798904	50	11	96	11	24	24.7581	11.3284	20.8372	17.644	26.6979	26.9534	NO	Ribosomal protein S8e
High	Obbri1_798921	34	13	45	13	58	11.5259	14.2964	3.04198	3.85302	5.96509	5.50891	NO	Carbohydrate kinase, FGGY; Glycerol kinase
High	Obbri1_798940	27	4	28	4	19.9	8.4058	9.3948	4.78427	9.16763	5.07297	10.2207	NO	Protein of unknown function DUF967; Protein of unknown function DUF336
High	Obbri1_799009	23	6	27	6	38.3	10.2344	10.5552	0.427598	0.111578		0.158752	YES	Glycoside hydrolase, family 10; Glycoside hydrolase, catalytic core
High	Obbri1_799019	11	2	13	2	35.9	9.32694	9.05808	2.24302	0.342359	2.43292		YES	Glycoside hydrolase, family 61
High	Obbri1_799055	11	3	6	1	31.1		0.689568		2.2626		3.69643	NO	WD40 repeat; WD40 repeat-like
High	Obbri1_799066	26	13	83	13	89.9	13.3119	13.1773	5.19219	7.68958	11.5479	9.05092	YES	Glycosyl hydrolase 92; Alpha-1,2-mannosidase, putative
High	Obbri1_799084	30	6	39	6	27.5	11.1965	10.9822	7.3039	9.94156	10.6868	13.051	NO	Ribosomal protein L2; Translation protein SH3-like; Nucleic acid-binding, OB-fold-like
High	Obbri1_799087	10	3	11	3	35.6	0.569298	0.731505	1.61567	3.61497	2.53348	5.59613	NO	Glucose/ribitol dehydrogenase; Short-chain dehydrogenase/reductase SDR; NAD(P)-binding
High	Obbri1_799124	63	20	260	20	38.5	36.3012	30.206	55.2857	79.2776	105.174	134.628	NO	Aldo/keto reductase
High	Obbri1_799236	75	11	83	11	24.2	4.00672	1.91499	7.84909	4.58753	30.0444	13.2314	NO	Carbonic anhydrase; Carbonic anhydrase, prokaryotic-like, conserved site
High	Obbri1_799256	25	7	26	7	49.8	2.15442	2.76364	4.67857	6.45172	5.61697	6.60158	NO	Peptidase M19, renal dipeptidase
High	Obbri1_799401	57	10	27	10	20.1	3.75986	3.9878	5.45116	6.03679	3.37893	5.64276	NO	Methionine sulphoxide reductase A
High	Obbri1_800145	60	21	206	20	55.7	19.3468	23.9241	23.7989	37.7182	38.6106	66.6307	NO	Aldehyde dehydrogenase; Aldehyde dehydrogenase, conserved site; Aldehyde/histidinol dehydrogenase
High	Obbri1_800169	20	2	9	2	13.4	5.3842	6.6142	4.23048	6.79016	4.56139	3.99525	NO	Ribosomal protein S25
High	Obbri1_802454	12	3	33	3	43.6	5.38247	3.15431	21.3357	35.0894	84.1468	107.274	NO	Peptidase A1; Peptidase aspartic, active site; Peptidase aspartic, catalytic
High	Obbri1_802591	4	13	23	13	511.4	0.757649	7.8204	1.03472	5.29751	2.60524	10.1507	NO	Myosin head, motor region; Synaptobrevin; Ribosomal protein L38e; Myosin, N-terminal, SH3-like; Haem peroxidase, animal; IQ calmodulin-binding region; Longin; Prefoldin; Haem peroxidase; Cytochrome P450; Myosin S1 fragment, N-terminal; Longin-like
High	Obbri1_803653	51	9	47	7	32.1	5.54098	5.03258	10.8557	17.241	8.3477	10.4048	NO
High	Obbri1_804222	30	6	17	3	34.8					27.1526		YES	Carboxylesterase, type B
High	Obbri1_805112	19	7	30	7	66.7	2.83533	6.35409	1.51894	2.30071	2.38052	2.71546	NO	Heat shock protein 70; Heat shock protein Hsp70
High	Obbri1_805793	8	4	11	4	57.6	5.23767	1.25627	2.16223	0.902928	1.11482	0.275125	NO	Histone H4; Histone core; Cyclin-like F-box; Histone-fold
High	Obbri1_806520	54	16	130	16	38.2	18.9506	18.4595	47.6388	51.2298	57.1978	57.8233	NO	Alcohol dehydrogenase, zinc-binding; Alcohol dehydrogenase GroES-like; GroES-like; NAD(P)-binding
High	Obbri1_807285	13	4	20	4	64.2	3.76912	7.00794	1.86811	2.6912	1.13587	1.77685	YES	Endonuclease/exonuclease/phosphatase
High	Obbri1_807525	32	7	38	7	36.4	11.5353	11.3138	8.04442	7.89645	8.90608	8.46753	NO	Dihydrodipicolinate synthetase
High	Obbri1_808161	22	10	56	10	59.1	2.38512	1.96281	12.0548	16.2809	23.5767	40.1563	NO	Glutathione S-transferase, C-terminal-like; Thioredoxin-like fold
High	Obbri1_808931	16	4	6	4	33.7			2.21882	0.14079	8.85976	0.651553	NO
High	Obbri1_808985	42	7	28	7	29.2	3.90085	5.88535	7.31345	8.59472	7.38574	10.0423	NO	Dienelactone hydrolase
High	Obbri1_808989	13	6	22	6	61.8	0.601669	6.6453	1.24106	7.58346	4.16024	7.72467	NO	Aspartyl-tRNA synthetase, class IIb; Aminoacyl-tRNA synthetase, class II (D, K and N); Nucleic acid binding, OB-fold, tRNA/helicase-type; Aspartyl-tRNA synthetase, class IIb, archea/euk type; Aminoacyl-tRNA synthetase, class II; Nucleic acid-binding, OB-fold-like
High	Obbri1_808997	16	8	63	8	86	11.2169	17.1187	4.1499	3.85547	8.05236	3.35667	YES	Cellulose-binding region, fungal; BNR repeat
High	Obbri1_809047	46	4	23	4	13.5	8.26431	6.84042	3.81719	6.24298	4.03025	2.99448	NO	Ribosomal protein L22e
High	Obbri1_809090	9	2	8	2	34	1.94634	1.34543	2.44764	1.63179	3.10897	2.16825	NO	Rhodanese-like
High	Obbri1_809109	20	6	33	6	45.3	2.74086	2.52239	3.62256	3.8802	5.81949	7.03047	NO	RNA recognition motif, RNP-1; RNA recognition, region 1
High	Obbri1_809223	49	13	71	10	45.8	5.50038	5.37381	0.822598	0.303913	19.9499	1.06227	NO	Aromatic-ring hydroxylase; FAD dependent oxidoreductase
High	Obbri1_809350	56	10	87	10	32	4.76948	5.10193	13.88	14.2783	18.0029	20.5679	NO	Isochorismatase hydrolase
High	Obbri1_809380	22	5	22	5	38.8	2.26407	1.435	3.33904	3.26022	4.98875	5.12064	NO	Metal-dependent protein hydrolase
High	Obbri1_809386	77	18	167	18	28.9	28.0993	26.9796	17.0847	18.8593	20.4681	23.2519	NO	Ribosomal protein S3, C-terminal; K Homology, type 2; Ribosomal protein S3, eukaryotic/archaeal; K Homology, prokaryotic type
High	Obbri1_809654	13	2	11	2	34.7	2.99986	3.32199	4.68159	5.97991	5.52386	5.78079	NO	K Homology, type 1; K Homology
High	Obbri1_809664	19	3	17	3	19.6	3.00878	10.1037	6.02531	10.7653	4.43857	8.94348	YES	MD-2-related lipid-recognition
High	Obbri1_809904	47	33	263	33	81.5	15.1478	10.6562	19.7605	19.9769	33.3506	35.516	NO	Glycosyl transferase, group 1
High	Obbri1_810113	38	11	46	11	49.6	1.42701	0.850476	1.55936	2.16398	3.12972	3.55106	NO	AAA ATPase, core; AAA+ ATPase, core; 26S proteasome subunit P45; AAA ATPase, conserved site
High	Obbri1_810193	7	2	5	2	46	3.48276	3.49991		0.143674			YES	Cupin 2, conserved barrel; Bicupin, oxalate decarboxylase/oxidase; Cupin, RmlC-type
High	Obbri1_810350	24	27	172	27	140.8	3.60395	6.77237	14.7086	20.3641	23.3447	38.7071	NO	D-isomer specific 2-hydroxyacid dehydrogenase, catalytic region; Proteasome/cyclosome, regulatory subunit; D-isomer specific 2-hydroxyacid dehydrogenase, NAD-binding; Hydroxymethylglutaryl-CoA reductase, class I/II, catalytic; Armadillo-type fold; NAD(P)-binding
High	Obbri1_810659	16	3	27	3	24.9	6.00253	8.24543	10.1649	13.0518	9.82224	11.9227	NO	CS; CS domain; HSP20-like chaperone
High	Obbri1_810698	26	4	13	4	21.5	1.01547	2.56844	1.8367	4.16224	3.96942	10.5087	NO	TB2/DP1 and HVA22 related protein
High	Obbri1_810813	25	5	32	5	27.7	9.02232	8.49752	6.0646	7.12252	6.08006	4.60998	NO	Ribosomal protein S6e; Ribosomal protein S6, eukaryotic
High	Obbri1_810891	4	2	12	2	49.1	23.0109	39.4567	18.5131	26.3236	14.0788	27.4941	NO	Nucleotide-sugar transporter; UDP-galactose transporter
High	Obbri1_811014	34	7	17	7	29.6	4.05951	3.28399	2.9138	4.31804	3.57719	4.91609	NO	Eukaryotic phosphomannomutase; HAD-superfamily hydrolase, subfamily IIB
High	Obbri1_811428	69	16	226	16	40.3	28.5277	30.3211	22.4709	31.7302	27.3114	47.9209	NO	GroES-related; Alcohol dehydrogenase, zinc-binding; Alcohol dehydrogenase GroES-like; Alcohol dehydrogenase, zinc-containing, conserved site; GroES-like; NAD(P)-binding
High	Obbri1_811723	76	21	849	21	39.3	1060.78	1109.15	557.607	735.883	484.255	871.47	NO	D-isomer specific 2-hydroxyacid dehydrogenase, catalytic region; D-isomer specific 2-hydroxyacid dehydrogenase, NAD-binding; NAD(P)-binding
High	Obbri1_811954	6	8	22	8	176.7	10.996	4.14912	10.3768	30.186	16.1939	7.66963	NO	DNA/RNA helicase, C-terminal; Helicase-associated region; Region of unknown function DUF1605; DEAD-like helicase, N-terminal; Helicase, superfamily 1 and 2, ATP-binding; DNA/RNA helicase, ATP-dependent, DEAH-box type, conserved site; Glutamine synthetase, beta-Grasp
High	Obbri1_812001	44	11	68	11	30	10.7156	15.3211	8.43381	12.0676	11.5946	16.7129	NO	Ribosomal protein L7Ae/L30e/S12e/Gadd45; Ribosomal protein L7Ae; Ribosomal protein L7A
High	Obbri1_812377	44	41	290	41	130	9.69039	6.24475	16.9905	17.6601	29.0395	28.9526	NO	Carbamoyl phosphate synthase, large subunit, N-terminal; Biotin/lipoyl attachment; Pyruvate carboxyltransferase; Conserved carboxylase region; Biotin carboxylase, C-terminal; Carbamoyl phosphate synthetase, large subunit, ATP-binding; Polynucleotide phosphorylase, phosphorolytic RNA-binding, bacterial/organelle-type; Pyruvate carboxylase; ATP-grasp fold; Biotin carboxylation region; Biotin-bindin…
High	Obbri1_812469	30	9	80	7	61	55.0218	60.6137	10.1018	10.8058	6.55995	8.56058	YES	Glycoside hydrolase, carbohydrate-binding; Glycoside hydrolase, family 15; Glycoside hydrolase 15-related; Glucan 1,4-alpha-glucosidase, starch-binding; Six-hairpin glycosidase-like; Carbohydrate-binding-like fold
High	Obbri1_812492	68	20	509	20	36.6	61.266	52.3225	100.91	129.169	232.416	293.981	NO	Glyceraldehyde 3-phosphate dehydrogenase; Glyceraldehyde-3-phosphate dehydrogenase, type I; NAD(P)-binding
High	Obbri1_812741	20	5	27	5	27.3	3.77921	7.16392	4.73465	11.9075	7.38526	15.4194	NO	Short-chain dehydrogenase/reductase SDR; WD40 repeat; NAD(P)-binding
High	Obbri1_812838	55	14	182	14	38.9	21.6671	25.7165	18.0426	22.3517	31.8712	31.7862	NO	Oxidoreductase, N-terminal; Oxidoreductase, C-terminal; NAD(P)-binding
High	Obbri1_812864	16	7	60	6	73.2	4.86721	5.79541	4.6843	6.41988	7.97325	9.77436	YES	Metallophosphoesterase
High	Obbri1_812867	8	4	20	4	60.2	3.20406	4.20428	2.43477	4.64053	3.37906	4.79558	NO	Beta-lactamase; Beta-lactamase-type transpeptidase fold
High	Obbri1_812963	9	2	30	2	33.5	28.586	56.6951	13.6674	19.133	22.0847	8.86868	NO
High	Obbri1_813260	12	4	55	4	68	6.75533	9.98891	13.1163	13.2243	23.3579	16.0929	YES	Peptidase S53, propeptide; Peptidase S8 and S53, subtilisin, kexin, sedolisin; Proteinase inhibitor, propeptide
High	Obbri1_813599	9	2	8	2	31.4	0.488115	1.34482	0.745014	1.55662	0.888558	1.47342	NO	RNA recognition motif, RNP-1; Translation initiation factor 3, RNA-binding subunit
High	Obbri1_813610	44	40	168	40	125.8	2.48597	2.1659	4.10603	7.94856	16.7471	27.3603	NO	ATP-citrate lyase/succinyl-CoA ligase; CoA-binding; ATP-citrate synthase; ATP-citrate lyase/succinyl-CoA ligase, active site; Succinyl-CoA ligase, alpha subunit; Citrate synthase-like, core; NAD(P)-binding; Succinyl-CoA synthetase-like
High	Obbri1_813700	42	21	182	21	68.4	35.5199	35.8851	20.1799	26.3879	33.6669	50.1419	NO	Pyridine nucleotide-disulphide oxidoreductase, NAD-binding region; FAD-dependent pyridine nucleotide-disulphide oxidoreductase
High	Obbri1_813927	21	12	124	12	105.5	18.8184	23.0098	13.4183	15.4788	33.1129	24.1321	YES	Glycoside hydrolase family 2, immunoglobulin-like beta-sandwich; Galactose-binding like; Glycoside hydrolase, catalytic core
High	Obbri1_814021	24	6	17	6	40.6	2.43616	2.61866	1.66241	3.15973	3.17931	6.70034	NO	Acyl-CoA oxidase/dehydrogenase, type 1; Acyl-CoA dehydrogenase/oxidase, central region; Acyl-CoA dehydrogenase, N-terminal; Acyl-CoA dehydrogenase, conserved site; Acyl-CoA dehydrogenase/oxidase C-terminal; Acyl-CoA dehydrogenase/oxidase, middle and N-terminal
High	Obbri1_814138	28	6	22	6	36.7	3.80264	2.70691	1.86913	1.68093	4.74749	4.23964	NO	2-nitropropane dioxygenase, NPD
High	Obbri1_814154	44	20	145	20	61.6	4.26181	3.97737	8.58632	19.7912	10.5331	28.2111	NO	Dak kinase; Dak phosphatase; Dihydroxyacetone kinase
High	Obbri1_814258	35	3	41	3	18.6	39.3493	61.4948	5.12154	8.18425	0.833618	2.80459	YES	Expansin 45, endoglucanase-like; Barwin-related endoglucanase
High	Obbri1_814646	14	2	7	2	33.7	3.81399	4.12226	1.59758	2.092	4.03826	3.01547	NO	Glycoside hydrolase, catalytic core
High	Obbri1_814923	20	8	37	8	53.5	3.02378	3.07918	4.47057	4.60461	8.57709	6.31018	NO	GHMP kinase; Phosphomevalonate kinase, eukaryotic
High	Obbri1_815162	7	6	18	6	100.3	1.97661	1.10739	1.35153	0.527984	2.65622	1.17248	NO	Glycoside hydrolase family 2, immunoglobulin-like beta-sandwich; Galactose-binding like; Glycoside hydrolase, catalytic core
High	Obbri1_815163	55	18	150	18	50.9	22.0042	19.5308	20.4823	21.51	30.4706	26.0917	NO	Pyridine nucleotide-disulphide oxidoreductase, NAD-binding region; FAD-dependent pyridine nucleotide-disulphide oxidoreductase; Pyridine nucleotide-disulphide oxidoreductase, class I; Mercuric reductase; Pyridine nucleotide-disulphide oxidoreductase, dimerisation; Glutathione reductase, animal and bacterial; Pyridine nucleotide-disulphide oxidoreductase, class I, active site; FAD/NAD-linked reduc…
High	Obbri1_815167	9	3	7	3	44.6	2.14907	4.38582	0.144876	1.72828	1.45537	2.06615	YES	Glycosyl hydrolase, family 88; Six-hairpin glycosidase-like
High	Obbri1_815611	15	2	12	2	16	6.8035	59.0024	5.5445	90.0155	6.29666	101.136	NO	Eukaryotic initiation factor 1A (eIF-1A); S1, IF1 type; Nucleic acid-binding, OB-fold-like
High	Obbri1_815755	32	10	70	10	43.5	8.40439	10.3111	9.13811	27.1088	8.4973	57.0779	NO	Thiolase; Thiolase-like
High	Obbri1_815766	32	7	34	7	31.9	3.38006	5.1453	5.14743	3.3245	3.48886	4.24792	NO	Alpha/beta hydrolase; Alpha/beta hydrolase fold-1
High	Obbri1_816014	27	11	49	11	47.5	6.31358	6.73267	14.5625	6.60256	11.6818	11.7697	NO	Argininosuccinate synthase
High	Obbri1_816220	7	2	6	2	59.6		0.505196	7.73925	2.66973	1.7639	1.64959	NO	Aminotransferase, class I and II; Pyridoxal phosphate-dependent transferase, major region
High	Obbri1_816348	32	12	153	12	59	15.8356	15.8826	20.6844	21.2424	48.7393	29.5513	YES	Carboxylesterase, type B
High	Obbri1_816395	26	5	22	5	22.7	7.20498	5.48292	4.04862	4.24146	4.20981	6.80892	NO	Ribosomal protein L13; Ribosomal protein L13, eukaryotic/archaeal
High	Obbri1_816407	12	3	10	3	25.3	1.10825	1.55214	1.25031	2.52727	2.28109	3.14325	NO	Phosphoglycerate mutase
High	Obbri1_816606	27	7	44	7	35	13.7796	21.1354	3.10798	1.71973	5.55818	1.26844	YES	Lipase, GDSL; Esterase, SGNH hydrolase-type
High	Obbri1_816624	14	9	14	9	95	2.11488	2.13103	2.36281	3.04779	5.43613	8.09358	NO	Short-chain dehydrogenase/reductase SDR; Glucose/ribitol dehydrogenase; MaoC-like dehydratase; NAD(P)-binding
High	Obbri1_816789	40	5	9	5	17.2	1.06525	4.37382	1.05856	3.08614	0.58405	3.21951	NO
High	Obbri1_817148	32	9	13	9	41.6	0.106332	0.188639	0.510685	1.39425	5.12915	5.16107	NO	Peptidase A1; Peptidase aspartic, active site; Peptidase aspartic, catalytic
High	Obbri1_817454	45	12	62	12	40.2	2.69243	3.5253	4.48756	7.07634	12.61	12.1231	NO	Isocitrate/isopropylmalate dehydrogenase; Isocitrate dehydrogenase NAD-dependent, mitochondrial
High	Obbri1_817494	21	12	38	12	69.5	1.44359	1.71366	2.14139	2.59888	3.52046	3.63102	NO	Arginyl-tRNA synthetase, class Ic, core; DALR anticodon binding; Arginyl-tRNA synthetase, class Ic; Aminoacyl-tRNA synthetase, class I, conserved site; Aminoacyl-tRNA synthetase, class 1a, anticodon-binding; Arginyl tRNA synthetase, class Ic, N-terminal
High	Obbri1_817548	33	11	96	8	45	7.63108	7.8716	12.2955	17.6192	18.3843	21.5953	NO	DNA/RNA helicase, DEAD/DEAH box type, N-terminal; DNA/RNA helicase, C-terminal; DEAD-like helicase, N-terminal; Helicase, superfamily 1 and 2, ATP-binding; RNA helicase, DEAD-box type, Q motif
High	Obbri1_817672	32	16	83	16	59.6	6.40725	4.30861	10.3868	13.3223	26.4147	26.1303	NO	ATPase, F1/V1/A1 complex, alpha/beta subunit, nucleotide-binding; ATPase, F1/V1/A1 complex, alpha/beta subunit, C-terminal; ATPase, F1/V1/A1 complex, alpha/beta subunit, N-terminal; ATPase, F1 complex, alpha subunit
High	Obbri1_817972	22	5	18	3	32.8	1.38286	0.762723	1.00753	1.17323	1.37585	2.89491	NO	Dihydrodipicolinate synthetase
High	Obbri1_818287	43	26	322	26	60	25.9807	23.5227	31.5375	40.1976	29.6556	40.3977	NO	Malate synthase; Malate synthase A; Malate synthase-like, core
High	Obbri1_818441	25	8	38	5	48.9	1.70961	2.45771	3.25032	4.79642	3.8713	7.01266	NO	Tubulin; Alpha tubulin; Tubulin/FtsZ, GTPase; Tubulin/FtsZ, C-terminal
High	Obbri1_818452	18	4	33	4	33.7	1.74308	1.73539	15.0796	16.1953	13.3276	23.1215	NO	Aldo/keto reductase
High	Obbri1_818655	14	3	15	1	38.5		2.72565		7.94338		12.3814	NO	Aldo/keto reductase
High	Obbri1_819144	5	2	6	2	48.9	2.53445	1.50908	1.60792	1.39365	2.37649	3.79122	NO	Oxidoreductase, N-terminal; Oxidoreductase, C-terminal; NAD(P)-binding
High	Obbri1_819531	66	24	238	22	55.7	20.9122	21.4475	26.3872	37.1543	35.5864	59.543	NO	Glycoside hydrolase, family 5; Glycoside hydrolase, catalytic core
High	Obbri1_819769	30	3	7	3	14.7	2.74819	1.79312	2.26987	1.72641	5.68573	3.19982	NO	Histone H2A; Histone core; Histone-fold
High	Obbri1_819781	11	8	21	8	98.2	1.34743	0.811917	1.57975	1.55678	5.53067	1.90301	NO	Glycosyl transferase, family 20; Trehalose-phosphatase; HAD-superfamily hydrolase, subfamily IIB
High	Obbri1_819804	21	2	8	2	16.6	1.6038	2.98401	1.20464	2.62739	1.20042	3.50157	NO	CMP/dCMP deaminase, zinc-binding; Cytidine deaminase, homotetrameric; APOBEC/CMP deaminase, zinc-binding; Cytidine deaminase-like
High	Obbri1_820020	17	25	319	25	166.4	40.2797	43.9617	33.6681	41.3405	30.0322	40.9838	NO	Calreticulin/calnexin; Protein synthesis factor, GTP-binding; Translation elongation factor EFG/EF2, C-terminal; Translation elongation factor EFTu/EF1A, domain 2; Translation elongation factor EFG/EF2, domain IV; Small GTP-binding protein; Concanavalin A-like lectin/glucanase; Translation elongation and initiation factors/Ribosomal, beta-barrel; Elongation factor G, III and V; Calreticulin/calne…
High	Obbri1_820437	7	2	4	2	58.7		0.52464		1.19987	0.445088	1.82908	NO	Phenylalanyl-tRNA synthetase, class IIc; Phenylalanyl-tRNA synthetase, class IIc, alpha subunit; Aminoacyl-tRNA synthetase, class II
High	Obbri1_820723	13	5	20	5	54.7	2.27054	2.39756	2.13758	3.00857	4.4424	4.68569	NO	Flavin-containing monooxygenase FMO; Dimethylaniline monooxygenase, N-oxide-forming
High	Obbri1_820779	43	7	69	7	29.2	2.84931	5.61011	4.25155	11.6711	5.82093	20.6734	NO	HpcH/HpaI aldolase; Pyruvate/Phosphoenolpyruvate kinase, catalytic core
High	Obbri1_821122	32	6	39	6	22.6	7.46568	7.9125	4.63376	5.42943	4.83908	9.62103	NO	Ribosomal protein S7; Ribosomal protein S7, eukaryotic/archaeal
High	Obbri1_821263	16	4	11	4	33.2	6.92615	6.86783	2.66525	2.02585	2.29742	1.47049	NO	Cellular retinaldehyde binding/alpha-tocopherol transport; Cellular retinaldehyde-binding/triple function, C-terminal; Cellular retinaldehyde-binding/triple function, N-terminal; Phosphatidylinositol transfer protein-like, N-terminal
High	Obbri1_821398	37	4	25	4	24.9	39.254	53.0001	16.8475	12.6852	3.3929	1.38285	YES	Glycoside hydrolase, family 61
High	Obbri1_821524	8	5	9	5	98.7	0.772305	2.31874	0.294775	3.82808	1.06197	6.74067	NO	MIF4G-like, type 1; MIF4G-like, type 2; Armadillo-type fold
High	Obbri1_821737	17	3	16	3	33.4	2.02919	11.2965	2.18797	12.9274	2.20657	13.3376	NO	BAR
High	Obbri1_822340	19	2	10	2	17.9	1.43098	1.63296	2.30618	2.95284	1.97644	2.57689	NO	RNA binding motif protein 8; RNA recognition motif, RNP-1
High	Obbri1_822374	13	4	18	4	49.5	1.34832	2.57933	1.61347	3.36849	2.67374	5.09908	NO	Arginine biosynthesis protein ArgJ; Peptidase S58 DmpA/arginine biosynthesis protein ArgJ
High	Obbri1_822552	73	22	350	22	29	168.201	107.889	74.4059	65.9355	40.6607	44.0382	NO	14-3-3 protein
High	Obbri1_822684	35	13	93	13	58.6	1.43037	2.82898	9.84691	14.8956	39.6021	27.498	YES	Carboxylesterase, type B
High	Obbri1_822957	14	3	8	3	43.4	0.20313	0.504299	0.299238	1.73655	1.20546	2.16979	NO	Diacylglycerol kinase, catalytic region
High	Obbri1_823113	8	5	14	5	50.8	3.16542	2.9869	3.69804	2.81218	3.08425	2.8074	NO	Histone H2B; Histone core; Histone-fold
High	Obbri1_823344	11	5	14	5	59.4	2.2257	1.76272	2.05483	1.96154	2.06773	3.59277	NO	Pyridoxal phosphate-dependent enzyme, beta subunit; Threonine synthase; Serine/threonine dehydratase, pyridoxal-phosphate-binding site; Opsin
High	Obbri1_823839	40	14	76	14	52.4	3.93267	3.60627	4.69189	6.11097	29.339	18.5398	NO	Glycine hydroxymethyltransferase; Pyridoxal phosphate-dependent transferase, major region
High	Obbri1_824438	61	42	270	42	85	13.6347	12.5556	24.9658	16.1495	73.8792	42.3249	NO	Methionine synthase, vitamin-B12 independent; Cobalamin (vitamin B12)-independent methionine synthase MetE, N-terminal; 5-methyltetrahydropteroyltriglutamate--homocysteine S-methyltransferase
High	Obbri1_824719	2	2	9	2	147.4	4.77175	2.55644	5.05171	4.01577	10.206	3.67498	NO	Heterokaryon incompatibility
High	Obbri1_825357	4	5	7	5	167.4	4.02332	0.933003	3.27416	0.769258	6.14003	1.97378	NO	WD40 repeat; WD40 repeat-like
High	Obbri1_825532	28	8	31	1	47.9	0.351328		0.759526	1.5658		4.83625	NO	Epoxide hydrolase-like; Alpha/beta hydrolase fold-1; Epoxide hydrolase, N-terminal; Epoxide hydrolase
High	Obbri1_825533	34	11	37	4	45.3	0.497605	0.477542	2.23601	3.25479	5.85753	12.1886	NO	Epoxide hydrolase-like; Alpha/beta hydrolase fold-1; Epoxide hydrolase, N-terminal; Epoxide hydrolase
High	Obbri1_826236	39	16	80	14	55.6	8.67409	3.04164	12.4398	7.99856	17.0261	14.1057	NO	Glycoside hydrolase, family 5; Glycoside hydrolase, catalytic core
High	Obbri1_826355	14	12	67	12	131.2	3.95607	5.23102	6.64331	12.1338	15.6664	20.9007	NO	Adenosine kinase; Carbohydrate/purine kinase; Protein-tyrosine phosphatase, catalytic; Protein-tyrosine phosphatase; Carbohydrate/puine kinase, PfkB, conserved site
High	Obbri1_827864	8	3	9	3	44.8	2.57534	0.848849	3.13265	1.09221	4.39567	1.46465	NO	Proteasome component region PCI
High	Obbri1_827955	70	15	76	15	30.7	4.07211	14.0954	9.47915	20.2325	15.0005	20.6884	NO	Aldo/keto reductase
High	Obbri1_829860	63	18	156	15	45.7	16.1685	14.9117	21.4222	22.9299	38.4742	26.5671	NO	Aromatic-ring hydroxylase; FAD dependent oxidoreductase
High	Obbri1_829907	42	12	73	12	30.2	5.49951	9.61321	5.9904	10.6559	9.03549	11.0251	NO	Glutathione S-transferase, N-terminal; Glutathione S-transferase, C-terminal-like; Thioredoxin-like fold
High	Obbri1_829999	10	3	14	3	43.7	1.64168	0.838167	2.74935	1.88442	3.66577	2.44667	NO	Aromatic amino acid beta-eliminating lyase/threonine aldolase; Pyridoxal phosphate-dependent transferase, major region
High	Obbri1_830136	40	17	124	17	62.6	8.60764	9.28541	9.06627	10.1032	10.4973	13.4083	NO	Carbohydrate kinase, FGGY
High	Obbri1_830351	24	4	14	4	17.7	5.15806	5.95867	3.63238	6.98885	5.07558	8.98215	NO	Ribosomal protein S17; Nucleic acid-binding, OB-fold-like
High	Obbri1_830821	44	22	168	22	77.3	9.68243	8.40437	11.2771	12.2587	16.5689	19.2236	NO	Peptidase M49, dipeptidyl-peptidase III; Peptidase M49, dipeptidyl-peptidase 3, eukaryotic
High	Obbri1_831097	17	3	12	3	22.9	1.01415	2.27614	1.27544	3.48408	1.75199	4.33292	NO	NUDIX hydrolase, core; NUDIX
High	Obbri1_831171	27	4	28	1	21.1	1.89407		3.03799		6.04382		NO	Aromatic-ring hydroxylase
High	Obbri1_831350	33	2	6	2	14.4	0.294482	0.929528	1.72097	3.39621	0.34485		NO	HMG-I and HMG-Y, DNA-binding; High mobility group proteins HMG-I and HMG-Y
High	Obbri1_831590	21	5	20	5	34.6	1.83769	1.62058	3.03801	3.81256	6.11262	6.75101	NO	Succinyl-CoA ligase, alpha subunit; ATP-citrate lyase/succinyl-CoA ligase; CoA-binding; ATP-citrate lyase/succinyl-CoA ligase, active site; NAD(P)-binding; Succinyl-CoA synthetase-like
High	Obbri1_831849	48	12	48	12	35.5	7.4779	4.33605	4.92571	4.60932	5.45373	6.21229	NO	Alpha/beta hydrolase; Peptidase S33, prolyl aminopeptidase; Alpha/beta hydrolase fold-1; Peptidase S33, proline iminopeptidase 1
High	Obbri1_831909	32	4	29	4	16.7	8.67472	4.39372	4.08885	1.05375	6.78899	1.50811	NO	Plectin/S10, N-terminal
High	Obbri1_832037	31	16	59	16	71.5	7.36684	2.83793	2.85405	0.945765	5.00912	2.98407	NO	Peptidase M1, membrane alanine aminopeptidase, N-terminal; Peptidase M1, leukotriene A4 hydrolase, aminopeptidase C-terminal; Peptidase M, neutral zinc metallopeptidases, zinc-binding site; Armadillo-type fold
High	Obbri1_832234	16	5	14	5	37.6	1.49002	1.07283	1.05967	2.23896	1.51734	4.07768	NO	GroES-related; Alcohol dehydrogenase, zinc-binding; Alcohol dehydrogenase GroES-like; Alcohol dehydrogenase, zinc-containing, conserved site; GroES-like; NAD(P)-binding
High	Obbri1_832277	11	5	7	5	88.3	2.03232	0.796837	0.531025	1.13391	0.943002	2.86449	NO	Pyruvate carboxyltransferase; 2-isopropylmalate synthase LeuA, allosteric (dimerisation) domain; Yeast 2-isopropylmalate synthase; Alpha-isopropylmalate/homocitrate synthase, conserved site
High	Obbri1_832348	18	10	58	10	91.3	5.67714	5.46877	6.51308	5.63757	18.3972	6.51745	YES	Glycosyl hydrolase 92; Alpha-1,2-mannosidase, putative
High	Obbri1_833054	4	2	4	2	78.2	3.38434	4.88553	0.305505	0.521584	0.466653		YES	Region of unknown function DUF1793
High	Obbri1_833127	7	4	9	4	80.3	1.55635	0.841662	1.06178	0.822245	1.81883	2.28743	NO	Glycoside hydrolase 15-related; Six-hairpin glycosidase-like
High	Obbri1_833133	14	3	49	3	33.9	47.4236	52.559	10.7748	33.6192	8.42241	44.6891	YES	Cellulose-binding region, fungal; Glycoside hydrolase, family 61
High	Obbri1_833165	12	4	25	4	57.6	4.18862	4.63349	2.70224	2.5457	3.33557	1.70805	YES	Carboxylesterase, type B
High	Obbri1_833316	6	2	13	2	54.5	57.0605	49.5253	21.421	18.0034	16.4006	14.1946	NO	WD40 repeat; WD40 repeat-like
High	Obbri1_833378	42	6	52	6	17.7	17.5175	21.7418	12.2448	21.5386	22.4278	31.3663	NO	Ribosomal protein L11
High	Obbri1_833397	7	3	20	2	58.2	4.6359		4.54316		11.121		YES	Carboxylesterase, type B
High	Obbri1_833398	8	3	47	3	59.3	6.49042	7.53949	16.8231	21.9346	26.5472	32.6872	YES	Carboxylesterase, type B; S-layer homology region
High	Obbri1_833422	18	7	85	6	59.2	8.36224	12.0234	36.5017	24.8812	71.9099	49.252	YES	Carboxylesterase, type B
High	Obbri1_833466	4	5	6	5	175	1.63756	1.17633	0.159232	0.469643		1.09941	NO	3-phosphoshikimate 1-carboxyvinyltransferase, core; Dehydroquinase class I; Shikimate kinase; Quinate/shikimate 5-dehydrogenase/glutamyl-tRNA reductase; 3-dehydroquinate synthase AroB; Shikimate dehydrogenase substrate binding, N-terminal; Pentafunctional AroM protein; 3-phosphoshikimate 1-carboxyvinyltransferase, subgroup; 3-dehydroquinate synthase AroB, subgroup; Shikimate-5-dehydrogenase; NAD(…
High	Obbri1_833534	5	2	7	2	36.1	17.989	9.45069	22.5126	13.8894	33.6921	20.0003	NO	DASH complex, subunit Duo1
High	Obbri1_834005	21	4	14	4	31.8	1.45715	1.49647	1.96532	3.18929	2.27095	2.45018	NO
High	Obbri1_834199	8	3	12	3	81.2	3.89363	5.48594	0.456626	0.39136	1.26965	1.45045	YES	Pectin lyase fold/virulence factor
High	Obbri1_834282	23	7	17	5	44.8	1.33402	2.13954	2.15131	3.29143	2.24982	4.52234	NO	Homogentisate 1,2-dioxygenase; Cupin, RmlC-type
High	Obbri1_834362	45	18	322	14	42.8	30.8355	22.6602	38.1023	49.0823	70.8489	97.9209	NO	Aldo/keto reductase
High	Obbri1_834539	34	15	169	14	58.9	17.0923	17.2405	54.1414	52.6996	78.5407	43.6184	YES	Amidase signature enzyme
High	Obbri1_834767	26	4	11	4	34.7	1.41887	0.158504	1.68964	1.20828	3.17986	1.92551	NO	Acetamidase/Formamidase
High	Obbri1_834820	15	6	16	6	55.8	4.39779	4.49975	3.76447	5.38933	5.03092	5.86906	NO	cAMP/cGMP-dependent protein kinase; Cyclic nucleotide-binding; cAMP-dependent protein kinase, regulatory subunit, type I/II alpha/beta; cAMP-dependent protein kinase regulatory subunit
High	Obbri1_834953	28	7	26	7	42.1	1.81984	2.53802	1.88851	4.65506	2.36119	5.36531	NO	Nucleotide sugar epimerase; NAD-dependent epimerase/dehydratase; UDP-glucose 4-epimerase; NAD(P)-binding
High	Obbri1_834979	15	2	11	2	12.9	5.36853	8.90253	6.01591	5.15256	5.23324	7.68619	NO	Ribosomal protein L34e
High	Obbri1_835165	24	3	54	3	15.9	12.7942	12.8029	13.5386	14.3382	18.9281	13.2423	NO	RNA recognition motif, RNP-1
High	Obbri1_835292	22	8	21	4	57.7	2.5182	1.47318	1.03972	0.492886	29.3121	1.04545	YES	Carboxylesterase, type B
High	Obbri1_835294	6	2	4	2	57.6	0.804376		1.33811		3.52813		YES	Carboxylesterase, type B
High	Obbri1_835587	30	7	16	7	22.2	7.67301	2.27026	8.83526	2.18674	15.5975	1.97629	NO	Ribosomal protein S4; RNA-binding S4; Ribosomal protein S4/S9, eukaryotic/archaeal
High	Obbri1_835635	6	2	39	1	36.5	0.39996		16.2383		16.6894	0.285312	NO	Alcohol dehydrogenase, zinc-binding; Alcohol dehydrogenase GroES-like; GroES-like; NAD(P)-binding
High	Obbri1_835784	72	27	542	27	57.6	161.455	162.776	153.979	227.736	225.479	310.426	NO	Catalase; Catalase, N-terminal
High	Obbri1_835924	31	2	6	2	10.5					3.16428		NO
High	Obbri1_837172	9	5	16	5	75.5	1.28674	1.41458	1.10675	1.85041	2.90775	4.153	NO	AMP-dependent synthetase and ligase
High	Obbri1_837812	16	2	8	2	22.2	1.74832	3.8757	1.77121	2.16457	2.53502	2.30087	NO	6,7-dimethyl-8-ribityllumazine synthase
High	Obbri1_837963	47	13	105	13	36.8	15.8476	12.1778	12.0358	11.8931	21.1743	17.3122	NO	Glutathione S-transferase, C-terminal; Glutathione S-transferase, predicted; Glutathione S-transferase, C-terminal-like; Thioredoxin-like fold
High	Obbri1_838176	21	16	33	16	116.7	1.00095	1.58059	0.983656	2.28053	6.16966	6.21609	NO	Flavodoxin-like; Flavoprotein pyridine nucleotide cytochrome reductase; Cytochrome P450; Cytochrome P450, E-class, group I; Oxidoreductase FAD/NAD(P)-binding; Flavodoxin/nitric oxide synthase; FAD-binding, type 1
High	Obbri1_838260	10	5	36	3	53.8	1.00597	37.345	0.24509	169.866	0.55587	249.447	NO	Aldehyde dehydrogenase; Aldehyde dehydrogenase, conserved site; Aldehyde/histidinol dehydrogenase
High	Obbri1_838428	35	5	18	5	27.9	3.88145	0.690727	5.09217	6.28915	7.19954	5.02856	NO	Dienelactone hydrolase
High	Obbri1_838583	7	2	4	2	53.6				0.626179	2.25402	1.10809	YES	Peptidase S10, serine carboxypeptidase
High	Obbri1_838588	20	2	14	2	33.2	3.95795	3.65856	1.55088	2.29953	11.6349	2.32899	NO	Glycoside hydrolase, chitinase active site; Glycoside hydrolase, catalytic core
High	Obbri1_838746	34	8	220	6	42.8	168.997	162.948	28.3601	23.1136	15.3085	11.751	YES	Cellulose-binding region, fungal; Glycoside hydrolase, family 10; Glycoside hydrolase, catalytic core
High	Obbri1_838993	20	7	31	6	56.7	1.64918	2.04115	5.64356	5.83563	4.19476	5.12411	NO
High	Obbri1_839047	52	14	154	14	37	15.3034	11.6574	25.0897	22.3681	13.3747	17.7704	NO	Inositol phosphatase/fructose-1,6-bisphosphatase
High	Obbri1_839290	43	11	72	8	38.8	3.47277	2.92378	4.60893	6.04577	5.2566	6.79911	NO	Aldo/keto reductase
High	Obbri1_839291	62	18	158	15	38.8	9.534	11.2206	18.7609	39.3672	28.7146	63.4592	NO	Aldo/keto reductase
High	Obbri1_839446	40	8	20	8	37.4	0.0950322	0.567741	0.312614	2.27682	7.84867	10.6729	NO	2-nitropropane dioxygenase, NPD
High	Obbri1_839535	23	5	15	5	37.9	1.86667	3.92383	1.46747	4.13403	2.15226	3.48389	NO	Pyridoxal phosphate-dependent enzyme, beta subunit; Cysteine synthase/cystathionine beta-synthase P-phosphate-binding site
High	Obbri1_839559	36	14	45	5	59.4	0.665344	0.899252	1.34201	1.88534	2.41017	3.7042	NO	UTP--glucose-1-phosphate uridylyltransferase; UTP--glucose-1-phosphate uridylyltransferase, subgroup
High	Obbri1_839602	9	3	23	3	59.3	16.4941	11.2708	1.44985	0.642217	1.91742	0.475135	YES	Peptidase S53, propeptide; Peptidase S8 and S53, subtilisin, kexin, sedolisin; Proteinase inhibitor, propeptide
High	Obbri1_839649	19	4	11	4	38.1	0.828636	0.884836	1.3729	1.82938	1.49827	2.48245	NO	Serine/threonine-specific protein phosphatase and bis(5-nucleosyl)-tetraphosphatase; Metallophosphoesterase
High	Obbri1_839682	19	6	13	4	35.9	5.15737	2.37808	1.66593	1.45709	1.92693	1.77771	YES	WD40 repeat; WD40 repeat-like
High	Obbri1_839825	43	3	13	2	7.6	2.87346	2.53645	2.4361		3.49273	2.67459	NO	Short-chain dehydrogenase/reductase SDR; NAD(P)-binding
High	Obbri1_839885	17	4	20	4	43.1	3.25171	0.939058	5.23083	3.10228	10.9128	6.50891	NO	GHMP kinase; GHMP kinase, C-terminal; Diphosphomevalonate decarboxylase
High	Obbri1_840055	8	2	18	2	50.2	17.2673	23.9978	7.72345	6.6004	15.8135	8.68702	YES	Glycoside hydrolase, family 18, catalytic domain; Carbohydrate-binding family V/XII; Glycoside hydrolase, chitinase active site; Glycoside hydrolase, catalytic core
High	Obbri1_840086	10	3	19	3	44.1	2.18472	4.30077	3.1053	7.84822	14.8027	18.8732	YES	Peptidase A1; Peptidase aspartic, catalytic
High	Obbri1_840497	9	2	6	2	43.6			0.886469	1.67742	4.19668	3.21884	YES	Arginase; Ureohydrolase
High	Obbri1_840653	39	15	89	15	61.9	5.78451	5.48517	10.3138	10.2173	15.4688	16.6945	NO	Amidase signature enzyme; Amidase, fungi type
High	Obbri1_845553	50	20	234	19	61.8	87.6903	84.0408	44.7337	50.4873	44.8078	69.7302	NO	Phosphoglucose isomerase (PGI)
High	Obbri1_845726	17	4	23	4	45	11.2758	10.868	2.06505	1.37915	1.20054	0.499851	YES	Arginase; Ureohydrolase
High	Obbri1_845766	64	19	249	19	41.8	6.39033	8.6814	54.4973	74.5393	65.0709	197.961	NO	Iron-containing alcohol dehydrogenase; Glycerol dehydrogenase; Aldehyde dehydrogenase, conserved site
High	Obbri1_849398	27	9	50	9	43	13.5787	8.77902	12.2152	5.68835	12.9615	4.96061	NO	Glycoside hydrolase, clan GH-D; Glycoside hydrolase, family 27; Glycoside hydrolase, catalytic core
High	Obbri1_849432	24	6	86	6	47.5	24.6265	28.2183	18.0502	17.5222	21.7129	15.6145	YES	Glycoside hydrolase, clan GH-D; Glycoside hydrolase, family 27; Glycoside hydrolase, catalytic core
High	Obbri1_851185	38	8	88	8	42.7	38.9797	47.8306	1.75384	0.755744	0.454349	0.439045	YES	Cellulose-binding region, fungal; Glycoside hydrolase, family 10; Glycoside hydrolase, catalytic core
High	Obbri1_851207	28	7	27	7	34.7	2.11192	2.92369	3.40746	3.77879	4.06574	5.28657	NO	WD40 repeat; WD40 repeat-like
High	Obbri1_853185	14	3	21	2	33.7	19.7349	29.1097			1.08979		YES	Concanavalin A-like lectin/glucanase
High	Obbri1_856932	21	6	10	6	52.5			0.259811	1.22534	3.41564	7.66701	NO	MmgE/PrpD; 2-methylcitrate dehydratase PrpD
High	Obbri1_859505	5	2	32	2	61.4	20.2341	26.1924	37.2319	30.0855	37.6302	33.5715	NO
High	Obbri1_864243	9	2	6	2	41.1	9.31491	6.94387	11.332	6.95166	6.3553	8.22494	NO	FAD-dependent pyridine nucleotide-disulphide oxidoreductase; Pyridine nucleotide-disulphide oxidoreductase, class-II; Pyridine nucleotide-disulphide oxidoreductase, NAD-binding region
High	Obbri1_864632	27	6	25	6	36.8	6.02622	3.0874	1.82044	1.19645	6.15917	7.69313	YES	Lipase, GDSL; Esterase, SGNH hydrolase-type
High	Obbri1_867497	61	17	326	17	40.1	106.234	90.7402	79.6648	84.0618	81.05	85.6348	NO	Alcohol dehydrogenase, zinc-binding; Alcohol dehydrogenase GroES-like; Alcohol dehydrogenase class III/S-(hydroxymethyl)glutathione dehydrogenase; Alcohol dehydrogenase, zinc-containing, conserved site; GroES-like; NAD(P)-binding
High	Obbri1_871439	21	6	14	6	45.6	0.539392	0.836292	3.78296	2.72885	2.5424	3.89429	NO	Protein synthesis factor, GTP-binding; Translation elongation factor EFTu/EF1A, C-terminal; Translation elongation factor EFTu/EF1A, domain 2; Small GTP-binding protein; Translation elongation factor EFTu/EF1A, bacterial and organelle; Translation elongation and initiation factors/Ribosomal, beta-barrel; Translation elongation factor EF1A/initiation factor IF2gamma, C-terminal
High	Obbri1_872364	48	13	61	9	43.9	2.63506	1.82085	2.81167	3.74163	10.6912	5.97894	NO	Aldo/keto reductase
High	Obbri1_874863	47	16	130	16	49.7	46.6992	46.9752	33.4972	30.2029	38.5026	22.7171	NO	Histidine acid phosphatase
High	Obbri1_879691	11	5	41	5	70	6.97971	38.5839	17.7582	81.1439	42.9654	59.0217	YES	Peptidase S53, propeptide; Peptidase S8 and S53, subtilisin, kexin, sedolisin; Proteinase inhibitor, propeptide
High	Obbri1_880391	2	2	5	2	135.4		0.601581		1.84138		2.8778	NO	K Homology, type 1; K Homology
High	Obbri1_883508	6	3	12	3	62.7	4.05985	3.2471	3.37115	7.27644	5.93676	12.0404	NO	Hexokinase
High	Obbri1_883916	76	30	440	30	54	47.3537	46.0776	86.8714	96.6992	86.535	166.67	NO	Homogentisate 1,2-dioxygenase; Cupin, RmlC-type
High	Obbri1_884157	7	3	20	3	71.1	2.79228	2.78577	1.72787	1.80341	2.96327	2.51656	NO	Uncharacterised conserved protein UCP014753
High	Obbri1_884295	33	5	39	5	20.5	4.62465	10.5471	7.614	10.4519	8.17902	8.88461	NO	Nascent polypeptide-associated complex NAC; Nascent polypeptide-associated complex, alpha subunit
High	Obbri1_884546	25	11	48	11	58.2	2.4361	4.76745	4.71158	6.34501	10.1367	13.7828	NO	Armadillo; Importin-alpha-like, importin-beta-binding region; Armadillo-type fold
High	Obbri1_884563	57	22	203	22	57.5	11.9879	10.8967	18.557	25.6709	39.8544	48.5386	NO	Pyruvate kinase, barrel; Pyruvate kinase, alpha/beta; Pyruvate kinase; Pyruvate kinase, beta-barrel-like; Pyruvate/Phosphoenolpyruvate kinase, catalytic core; Pyruvate kinase, C-terminal-like
High	Obbri1_885239	29	8	29	8	44.2	5.19831	1.30299	6.24577	1.76095	5.46987	2.78408	NO	Dehydrogenase, E1 component; Pyruvate dehydrogenase (acetyl-transferring) E1 component, alpha subunit, subgroup y
High	Obbri1_885341	6	2	5	2	51.1	0.23411	1.67676		0.477325	0.597014	0.764969	YES	Glycoside hydrolase, catalytic core
High	Obbri1_885377	19	5	18	5	39	2.04003	1.399	1.5778	1.56407	1.97223	2.58618	NO	2OG-Fe(II) oxygenase
High	Obbri1_885574	18	5	9	5	48	1.0417	1.29122	0.869834	2.39441	1.22556	3.42204	NO	Proteasome component region PCI; PCI/PINT associated module
High	Obbri1_885614	10	7	33	7	105.5	2.00217	2.47913	2.34296	3.44014	4.40986	6.33707	NO	Proteasome/cyclosome, regulatory subunit; 26S proteasome regulatory complex, non-ATPase subcomplex, Rpn1 subunit; Armadillo-type fold
High	Obbri1_885679	67	26	347	26	45.3	70.2082	85.2971	64.7316	73.0874	36.8094	53.7169	NO	Methionine synthase, vitamin-B12 independent
High	Obbri1_885712	57	20	179	20	65.5	30.0389	30.9201	10.3918	8.87274	11.1747	8.37453	NO	Glucose-methanol-choline oxidoreductase, N-terminal; Glucose-methanol-choline oxidoreductase, C-terminal; Glucose-methanol-choline oxidoreductase
High	Obbri1_885912	14	3	16	3	30.6	5.75972	1.78405	5.5019	1.94124	3.79249	2.60201	NO	Orotidine 5'-phosphate decarboxylase, core; Orotidine 5'-phosphate decarboxylase, subfamily 1, core; Ribulose-phosphate binding barrel
High	Obbri1_885939	21	16	67	16	100.5	5.16349	1.51888	7.25897	9.48034	10.1545	11.4297	NO	Argonaute and Dicer protein, PAZ; Stem cell self-renewal protein Piwi; Region of unknown function DUF1785; Polynucleotidyl transferase, Ribonuclease H fold
High	Obbri1_886003	22	14	48	14	106.5	2.71207	2.96586	2.27407	3.45338	4.21164	4.41921	NO	Argonaute and Dicer protein, PAZ; Stem cell self-renewal protein Piwi; Region of unknown function DUF1785; Polynucleotidyl transferase, Ribonuclease H fold
High	Obbri1_886019	39	9	41	9	42.9	3.15372	2.2127	3.49293	3.62844	9.71357	9.93316	NO	NAD-dependent epimerase/dehydratase; GDP-mannose 4,6-dehydratase; Short-chain dehydrogenase/reductase SDR; NAD(P)-binding
High	Obbri1_886234	19	6	32	6	38.2	1.62263	1.57238	3.52577	3.79283	3.36824	3.81881	NO	Aldo/keto reductase
High	Obbri1_886441	8	2	7	2	42.5	2.03205	0.984703	1.54087	0.991658	2.72631	2.46848	NO	Amidohydrolase 2
High	Obbri1_886828	28	8	24	8	58.7	6.33024	1.92869	2.81608	1.06337	4.99423	2.28716	NO	Eukaryotic molybdopterin oxidoreductase; Oxidoreductase, molybdopterin binding; Moybdenum cofactor oxidoreductase, dimerisation; Immunoglobulin E-set
High	Obbri1_886894	46	10	63	10	35.9	4.27939	5.28799	3.56561	6.70851	4.71168	10.3696	NO	Carbohydrate kinase
High	Obbri1_887019	13	9	20	9	118.9	1.50284	0.777367	2.32651	1.23176	3.04413	2.59636	NO	HEAT; Importin-beta, N-terminal; Armadillo-type fold
High	Obbri1_887036	4	2	6	2	60.3	0.565237	1.41968	0.916534	1.91004	1.18399	3.53702	NO	Glycoside hydrolase, family 3, N-terminal; Glycoside hydrolase, catalytic core
High	Obbri1_887070	6	2	9	2	44.5	1.08853	1.24116	1.04388	2.14437	1.95391	2.31148	NO	AAA ATPase, core; AAA+ ATPase, core; 26S proteasome subunit P45; AAA ATPase, conserved site
High	Obbri1_887078	21	4	23	4	29.4	3.12562	9.05116	4.35674	13.2478	5.99691	24.8338	NO	Short-chain dehydrogenase/reductase SDR; Glucose/ribitol dehydrogenase; NAD(P)-binding
High	Obbri1_887260	34	3	17	3	12.1	9.99887	6.922	5.49898	5.02924	7.00802	4.68485	NO	Ribosomal protein L7Ae/L30e/S12e/Gadd45; Ribosomal protein L30e
High	Obbri1_887448	31	19	120	19	82.6	16.1986	16.7839	12.1803	17.4547	25.9297	35.146	NO	Spermine synthase; Saccharopine dehydrogenase; NAD(P)-binding
High	Obbri1_887531	18	18	107	18	141.1	8.0443	13.0494	6.65601	13.539	10.7102	16.6521	NO	Amidohydrolase-like; Amidohydrolase 1; Metal-dependent hydrolase, composite
High	Obbri1_887666	20	3	6	3	14.3	6.83856	5.82622	3.60745	3.60774	4.72337	5.31523	NO	Ribosomal protein L31e
High	Obbri1_887998	11	6	12	6	93.6	1.0049	1.36126	1.21932	0.841173	3.07592	2.97891	NO	WD40 repeat; Coatomer, WD associated region; Coatomer, beta' subunit; WD40 repeat-like
High	Obbri1_888202	37	5	52	5	18.6	12.9677	13.8031	9.37384	11.5559	10.7203	15.0405	NO	Ribosomal protein L21e; Translation protein SH3-like
High	Obbri1_888455	5	4	8	4	127.4	3.09997	0.966919	3.50753	1.39404	7.14331	2.99803	NO	Glycoside hydrolase, family 38, core; Glycosyl hydrolases 38, C-terminal; Glycoside hydrolase, family 38, central region; Glycoside hydrolase/deacetylase, beta/alpha-barrel
High	Obbri1_888628	15	3	11	3	42.4		0.124354	0.900935	2.1877	5.45754	2.92015	YES	Arginase; Ureohydrolase; Putative agmatinase
High	Obbri1_888853	21	5	11	5	38	0.313326	0.991475	0.209268	3.13167	0.691552	2.21677	NO	Mov34-1; Mov34/MPN/PAD-1
High	Obbri1_889221	5	4	9	4	99.9	0.463359	3.27408	0.454832	5.27433	0.672038	7.27056	NO	Staphylococcus nuclease subtype; Staphylococcal nuclease (SNase-like); Maternal tudor protein; RNA-induced silencing complex, nuclease component Tudor-SN; Tudor; Staphylococcal nuclease (SNase-like), OB-fold
High	Obbri1_889612	10	4	10	4	75	0.815422	0.872755	0.525587	0.951769	1.57207	2.61179	NO	Acyl-CoA oxidase/dehydrogenase, type 1; Acyl-CoA oxidase, C-terminal; Acyl-CoA dehydrogenase/oxidase, central region; Acyl-CoA oxidase; Acyl-CoA dehydrogenase/oxidase C-terminal; Acyl-CoA dehydrogenase/oxidase, middle and N-terminal
High	Obbri1_889671	23	2	9	2	14.6	6.40008		1.8007	2.11902	9.04652	4.27548	NO	Ribosomal protein S8
High	Obbri1_889782	6	3	16	2	74.5		1.90651	0.489726	2.75148	2.78058	2.3277	YES	Metallophosphoesterase; Sphingomyelin phosphodiesterase
High	Obbri1_889978	9	5	12	5	68.5	3.28787	0.414478	1.75764	0.59296	3.09564	0.936205	YES	6-phospho-beta-galactosidase, eukaryotic; Glycoside hydrolase, family 1; Glycoside hydrolase, catalytic core
High	Obbri1_889992	50	16	44	16	51.3	2.82793	2.13024	4.27076	4.36726	8.31822	9.7179	NO	UDP-glucose/GDP-mannose dehydrogenase, dimerisation; UDP-glucose/GDP-mannose dehydrogenase, C-terminal; UDP-glucose/GDP-mannose dehydrogenase, N-terminal; Nucleotide sugar dehydrogenase; 6-phosphogluconate dehydrogenase, C-terminal-like; NAD(P)-binding
High	Obbri1_890752	4	4	7	4	121.2	0.202815	0.565237	0.221472	0.468887	0.380121	0.889872	NO	I/LWEQ; ANTH; Epsin-like, N-terminal; ENTH/VHS; Lipoprotein, type 6
High	Obbri1_891253	71	41	528	38	70.9	30.6895	32.8621	64.6647	87.1039	71.7671	81.2526	NO	Heat shock protein 70; Heat shock protein Hsp70
High	Obbri1_891370	6	6	8	6	125.2	0.705943	0.984566	0.389441	1.35974	1.97064	2.68526	NO	Isoleucyl-tRNA synthetase, class Ia, N-terminal; Aminoacyl-tRNA synthetase, class Ia; Valyl/Leucyl/Isoleucyl-tRNA synthetase, class I, anticodon-binding; Isoleucyl-tRNA synthetase, class Ia; Aminoacyl-tRNA synthetase, class I, conserved site; Aminoacyl-tRNA synthetase, class 1a, anticodon-binding; Valyl/Leucyl/Isoleucyl-tRNA synthetase, class Ia, editing
High	Obbri1_891509	11	4	14	4	59.7	0.695678	1.1993	0.679302	1.76687	1.31899	2.3596	NO	Glutamine amidotransferase superfamily; Glutamine amidotransferase class-I, C-terminal; GMP synthase, C-terminal; tRNA (5-methylaminomethyl-2-thiouridylate)-methyltransferase; GMP synthase, N-terminal; Glutamine amidotransferase, class I, active site
High	Obbri1_891524	1	4	6	4	405	1.60603	1.26612	0.947372	0.412693	1.48106	1.11373	NO	Ubiquitin-associated/translation elongation factor EF1B, N-terminal; HECT; E3 ubiquitin ligase, region of unknown function DUF908; E3 ubiquitin ligase, region of unknown function DUF913; Ubiquitin-associated/translation elongation factor EF1B, N-terminal, eukaryote; UBA-like; Armadillo-type fold
High	Obbri1_891614	46	10	49	7	39.8	73.0282	45.0519	3.29403	3.80633	5.20009	3.97336	YES	Haem peroxidase, plant/fungal/bacterial; Fungal lignin peroxidase; Haem peroxidase
High	Obbri1_892068	11	17	22	17	247.3		0.536614		2.27338		7.99445	NO	Carbamoyl phosphate synthase, large subunit, N-terminal; Biotin/lipoyl attachment; Carboxyl transferase; Biotin carboxylase, C-terminal; Carbamoyl phosphate synthetase, large subunit, ATP-binding; Acetyl-CoA carboxylase, central region; ATP-grasp fold; Biotin carboxylation region; Acetyl-coenzyme A carboxyltransferase, N-terminal; Acetyl-coenzyme A carboxyltransferase, C-terminal; Biotin-binding …
High	Obbri1_892092	58	17	275	17	37	32.533	34.0713	78.9337	59.0016	64.2371	55.0223	NO	Alcohol dehydrogenase, zinc-binding; Alcohol dehydrogenase GroES-like; GroES-like; NAD(P)-binding
High	Obbri1_892146	15	5	25	5	41.1	4.2049	1.73329	4.97192	3.32343	8.76302	3.28966	NO	Peptidyl-prolyl cis-trans isomerase, cyclophilin-type; Tetratricopeptide region; Cyclophilin-like
High	Obbri1_91658	14	4	61	4	54.3	5.52567	7.1627	6.42593	17.1801	31.8648	14.3421	YES	Cellulose-binding region, fungal; Glycoside hydrolase, family 7; Concanavalin A-like lectin/glucanase

## Sheet: G. subvermispora_IP values
Supplementary Table S1(D): Plant cell wall degrading CAZymes detected in the proteome of G. subvermispora during cultivation on solid spruce wood during the time course of 8 weeks.
Enzyme abbreviations: AAO = aryl alcohol oxidase, ABF = α-arabinofuranosidase, AGL = α-1,4-galactosidase, AGU = α-glucuronidase, AOX = alcohol oxidase, AXE = acetyl xylan esterase, AXL = α-xylosidase, BGL = β-1,4-glucosidase,
BXL = β-1,4-xylosidase, CBHI = cellobiohydrolase (reducing end), CDH = cellobiose dehydrogenase, EGL = β-1,4-endoglucanase, GE = 4-O-methyl-glucuronyl methylesterase, GLX = glyoxal oxidase, HAE = hemicellulose acetylesterase, LPMO = lytic polysaccharide monooxygenase,
LCC = laccase, MAN = β-1,4-endomannanase, MND = β-1,4-mannosidase, MnP = manganese peroxidase, XG-EG = xyloglucanase, XLN = β-1,4-endoxylanase.
IP values = Ion Profile values.
					Protein abundance (IP values)
					Time point (weeks)
Protein_ID	CAZy	Enzyme	Description	Plant biomass substrate	2	4	8
118801	AA1_1	LCC	Multicopper oxidase	lignin	23	-	-
105539	AA2	MnP	Class II peroxidase	lignin	263	242	1218
94398	AA2	MnP	Class II peroxidase	lignin	26	4	--
49863	AA2	MnP	Class II peroxidase	lignin	133	40	12
50686	AA2	MnP	Class II peroxidase	lignin	56	146	16
143390	AA2	MnP	Class II peroxidase	lignin	--	--	6
116608	AA2	MnP	Class II peroxidase	lignin	--	--	6
157986	AA2	MnP	Class II peroxidase	lignin	--	27	--
117436	AA2	MnP	Class II peroxidase	lignin	21.2749	22.8764	35.9745
84557	AA3_2	AAO	GMC oxidoreductase	H2O2-supply	42	38	47
116159	AA3_2	AAO	GMC oxidoreductase	H2O2-supply	25	6	--
115252	AA3_2	AAO	GMC oxidoreductase	H2O2-supply	--	--	8
80773	AA3_3	AOX	GMC oxidoreductase	H2O2-supply	739	163	266
139982	AA3_3	AOX	GMC oxidoreductase	H2O2-supply	--	10	18
84792	AA8-AA3_1	CDH	Iron reductase domain / GMC oxidoreductase	cellulose	39	26	12
86259	GH1	BGL	Glycoside Hydrolase Family 1 protein	cellulose	10	11	20
83802	GH1	BGL	Glycoside Hydrolase Family 1 protein	cellulose	6	12	--
117120	GH3	BGL	Glycoside Hydrolase Family 3 protein	cellulose	22	10	8
118496	GH3	BGL	Glycoside Hydrolase Family 3 protein	cellulose	6	10	15
79557	CBM1-GH5_5	EGL	Carbohydrate-Binding Module Family 1 / Glycoside Hydrolase Family 5 protein	cellulose	17.6839	15.5795	5.57909
117046	CBM1-GH5_5	EGL	Carbohydrate-Binding Module Family 1 / Glycoside Hydrolase Family 5 protein	cellulose	--	--	5.29387
136606	GH7-CBM1	CBHI	Glycoside Hydrolase Family 7 / Carbohydrate-Binding Module Family 1 protein	cellulose	85	68	5
111905	GH131	EGL	Glycoside Hydrolase Family 131 protein	cellulose	4.82124	10.4567	6.35995
80500	GH2	MND	Glycoside Hydrolase Family 2 protein	galacto(gluco)mannan	46	21	18
117774	GH2	MND	Glycoside Hydrolase Family 2 protein	galacto(gluco)mannan	10	5	6
147790	GH5_7	MAN	Glycoside Hydrolase Family 5 protein	galacto(gluco)mannan	23	15	14
94795	CBM1-GH5_7	MAN	Carbohydrate-Binding Module Family 1 / Glycoside Hydrolase Family 5 protein	galacto(gluco)mannan	110	61	9
85281	GH27	AGL	Glycoside Hydrolase Family 27 protein	galacto(gluco)mannan	22	13	16
85285	GH27	AGL	Glycoside Hydrolase Family 27 protein	galacto(gluco)mannan	9.1612	6.99671	--
115721	GH5_22	BXL	Glycoside Hydrolase Family 5 protein	xylan	77	40	36
53412	GH10	XLN	Glycoside Hydrolase Family 10 protein	xylan	13	--	--
116326	GH10	XLN	Glycoside Hydrolase Family 10 protein	xylan	5	12	46
85545	GH10	XLN	Glycoside Hydrolase Family 10 protein	xylan	5	5	9
59733	CBM1-GH10	XLN	Carbohydrate-Binding Module Family 1 / Glycoside Hydrolase Family 10 protein	xylan	176	60	19
97858	CBM1-GH10	XLN	Carbohydrate-Binding Module Family 1 / Glycoside Hydrolase Family 10 protein	xylan	43	16	--
67561	CBM1-GH10	XLN	Carbohydrate-Binding Module Family 1 / Glycoside Hydrolase Family 10 protein	xylan	20	5	--
113951	GH115	AGU	Glycoside Hydrolase Family 115 protein	xylan	7	5	7
139624	GH115	AGU	Glycoside Hydrolase Family 115 protein	xylan	5	--	--
68569	CBM1-CE1	AXE	Carbohydrate-Binding Module Family 1 / Carbohydrate Esterase Family 1 protein	xylan	7	--	--
118322	CE15	GE	Carbohydrate Esterase Family 15 protein	xylan	24	18	39
21396	CE15	GE	Carbohydrate Esterase Family 15 protein	xylan	5	--	--
135553	GH31	AXL	Glycoside Hydrolase Family 31 protein	xyloglucan	6	--	--
79435	GH74-CBM1	XG-EG	Glycoside Hydrolase Family 74 protein / Carbohydrate-Binding Module Family 1	xyloglucan	9	7	--
46564	AA9	LPMO	Lytic polysaccharide monooxygenase	diverse	92	59	31
85474	AA9	LPMO	Lytic polysaccharide monooxygenase	diverse	17	28	12
66688	AA9-CBM1	LPMO	Lytic polysaccharide monooxygenase	diverse	73	72	8
107901	CE16	HAE	Carbohydrate Esterase Family 16 protein	hemicellulose	16	8	15
87580	CBM1-CE16	HAE	Carbohydrate-Binding Module Family 1 / Carbohydrate Esterase Family 16 protein	hemicellulose	12	10	5
162360	GH51	ABF	Glycoside Hydrolase Family 51 protein	diverse	33.6192	14.9992	9.21417

## Sheet: G. subvermispora_ALL CAZymes
Supplementary Table S1(E): All the CAZymes detected in the proteome of G. subvermispora during cultivation on solid spruce wood during the time course of 8 weeks.
Enzyme abbreviations: AAO = aryl alcohol oxidase, ABF = α-arabinofuranosidase, AGL = α-1,4-galactosidase, AGU = α-glucuronidase, AOX = alcohol oxidase, AXE = acetyl xylan esterase, AXL = α-xylosidase, BGL = β-1,4-glucosidase,
BXL = β-1,4-xylosidase, CBHI = cellobiohydrolase (reducing end), CDH = cellobiose dehydrogenase, EGL = β-1,4-endoglucanase, GE = 4-O-methyl-glucuronyl methylesterase, GLX = glyoxal oxidase,HAE = hemicellulose acetylesterase, LPMO = lytic polysaccharide monooxygenase,
LCC = laccase, MAN = β-1,4-endomannanase, MND = β-1,4-mannosidase, MnP = manganese peroxidase,NPCWDE = non plant cell wall degrading enzyme, XG-EG = xyloglucanase, XLN = β-1,4-endoxylanase.
IP values = Ion Profile values.
				Protein abundance (IP values)
				Time point (weeks)
Protein ID	CAZy	Enzyme	Description	2	4	8
118801	AA1_1	LCC	Laccase	17.4143	3.36116	2.14292
105539	AA2	MnP	Class II peroxidase	263.254	241.643	1218.09
94398	AA2	MnP	Class II peroxidase	25.8053	3.62562	0.619509
49863	AA2	MnP	Class II peroxidase	133.269	40.0642	12.2672
50686	AA2	MnP	Class II peroxidase	56.0579	146.219	16.2295
157986	AA2	MnP	Class II peroxidase	1.18113	27.067	3.83659
143390	AA2	MnP	Class II peroxidase	--	--	6.44473
116608	AA2	MnP	Class II peroxidase	--	2.79288	6.22097
157986	AA2	MnP	Class II peroxidase	1.18113	27.067	3.83659
117436	AA2	MnP	Class II peroxidase	21.2749	22.8764	35.9745
84557	AA3_2	AAO	GMC oxidoreductase	42	38	47
116159	AA3_2	AAO	GMC oxidoreductase	25.1019	6.17225	1.46906
115252	AA3_2	AAO	GMC oxidoreductase	--	0.652346	7.49666
80773	AA3_3	AOX	GMC oxidoreductase	896.529	166.188	315.051
139982	AA3_3	AOX	GMC oxidoreductase	--	10.4497	23.2669
115979	AA5_1	GLX	Copper radical oxidase	2.03011	3.52742	3.6584
84792	AA8-AA3_1	CDH	Iron reductase domain / Cellobiose dehydrogenase	39	26	12
46564	AA9	LPMO	Lytic polysaccharide monooxygenase	92.0468	59.0144	31.4505
85474	AA9	LPMO	Lytic polysaccharide monooxygenase	17	28	12
66688	AA9-CBM1	LPMO	Lytic polysaccharide monooxygenase	73	72	8
86259	GH1	BGL	Glycoside Hydrolase Family 1 protein	10	11	20
83802	GH1	BGL	Glycoside Hydrolase Family 1 protein	6.03782	11.5558	3.32241
80500	GH2	MND	Glycoside Hydrolase Family 2 protein	46	21	18
117774	GH2	MND	Glycoside Hydrolase Family 2 protein	10	5	6
117120	GH3	BGL	Glycoside Hydrolase Family 3 protein	22	10	8
118496	GH3	BGL	Glycoside Hydrolase Family 3 protein	6	10	15
116563	GH3	NPCWDE	Glycoside Hydrolase Family 3 protein	0.774969	3.95975	4.05295
111694	GH3	BGL	Glycoside Hydrolase Family 3 protein	2.97007	1.3356	2.44772
79557	CBM1-GH5_5	EGL	Carbohydrate-Binding Module Family 1 / Glycoside Hydrolase Family 5 protein	17.6839	15.5795	5.57909
117046	CBM1-GH5_5	EGL	Carbohydrate-Binding Module Family 1 / Glycoside Hydrolase Family 5 protein	0.980122	2.72946	5.29387
147790	GH5_7	MAN	Glycoside Hydrolase Family 5 protein	23	15	14
94795	CBM1-GH5_7	MAN	Carbohydrate-Binding Module Family 1 / Glycoside Hydrolase Family 5 protein	110	61	9
115721	GH5_22	BXL	Glycoside Hydrolase Family 5 protein	77	40	36
115728	GH5_22	BXL	Glycoside Hydrolase Family 5 protein	3.43208	2.66048	3.14164
136606	GH7-CBM1	CBHI	Glycoside Hydrolase Family 7 / Carbohydrate-Binding Module Family 1 protein	85	68	5
89943	GH7-CBM1	CBHI	Glycoside Hydrolase Family 7 / Carbohydrate-Binding Module Family 1 protein	3.26871	--	1.10076
53412	GH10	XLN	Glycoside Hydrolase Family 10 protein	12.6375	2.08601	2.0919
85545	GH10	XLN	Glycoside Hydrolase Family 10 protein	5.41496	5.23595	9
116326	GH10	XLN	Glycoside Hydrolase Family 10 protein	4.84858	12	46
59733	CBM1-GH10	XLN	Carbohydrate-Binding Module Family 1 / Glycoside Hydrolase Family 10 protein	176	60	19
97858	CBM1-GH10	XLN	Carbohydrate-Binding Module Family 1 / Glycoside Hydrolase Family 10 protein	43.3136	15.9665	2.8325
67561	CBM1-GH10	XLN	Carbohydrate-Binding Module Family 1 / Glycoside Hydrolase Family 10 protein	19.7857	5.09331	0.838142
111515	CBM48-GH13_8	NPCWDE	Carbohydrate-Binding Module Family 48 / Glycoside Hydrolase Family 13 protein	4.26409	8.73779	13.7369
104322	GH13_25-GH133	NPCWDE	Glycoside Hydrolase Family 13 / Glycoside Hydrolase Family 133 protein	--	--	0.907084
80925	GH15	GLA	Glycoside Hydrolase Family 15 protein	2.14503	1.01517	0.996173
112301	GH15-CBM20	GLA	Glycoside Hydrolase Family 15 / Carbohydrate-Binding Module Family 20 protein	3.72439	--	--
79076	GH16	NPCWDE	Glycoside Hydrolase Family 16 protein	20.6197	2.26263	--
115963	GH16	NPCWDE	Glycoside Hydrolase Family 16 protein	1.0795	2.53141	--
114660	GH18	NPCWDE	Glycoside Hydrolase Family 18 protein	3.56512	2.22966	--
111955	GH20	NPCWDE	Glycoside Hydrolase Family 20 protein	2.00312	2.86559	1.3598
85281	GH27	AGL	Glycoside Hydrolase Family 27 protein	22	13	16
110265	GH27	AGL	Glycoside Hydrolase Family 27 protein	3.69225	0.645625	0.618758
85285	GH27	AGL	Glycoside Hydrolase Family 27 protein	9.1612	6.99671	4
135553	GH31	AXL	Glycoside Hydrolase Family 31 protein	6.37968	2.23625	2.04445
85426	GH47	NPCWDE	Glycoside Hydrolase Family 47 protein	6.51352	12.2172	30.8045
162360	GH51	ABF	Glycoside Hydrolase Family 51 protein	33.6192	14.9992	9.21417
83327	GH55	NPCWDE	Glycoside Hydrolase Family 55 protein	11.1891	--	--
79435	GH74-CBM1	XG-EG	Glycoside Hydrolase Family 74 / Carbohydrate-Binding Module Family 1 protein	9.19052	7.24182	0.853845
80796	GH79	NPCWDE	Glycoside Hydrolase Family 79 protein	73.7375	33.2332	25.5188
86532	GH88	UGH	Glycoside Hydrolase Family 88 protein	4.58595	1.23922	1.2849
114626	GH92	NPCWDE	Glycoside Hydrolase Family 92 protein	15.7743	15.0839	13.9858
114291	GH92	NPCWDE	Glycoside Hydrolase Family 92 protein	2.95077	4.78814	3.35711
111711	GH92	NPCWDE	Glycoside Hydrolase Family 92 protein	1.8869	2.78455	2.50348
139624	GH115	AGU	Glycoside Hydrolase Family 115 protein	4.61806	2.79779	3.83495
113951	GH115	AGU	Glycoside Hydrolase Family 115 protein	7	5	7
111905	GH131	EGL	Glycoside Hydrolase Family 131 protein	4.82124	10.4567	6.35995
86589	GT4	NPCWDE	Glycosyltransferase Family 4 protein	22.3268	39.3642	37.2488
89195	GT20	NPCWDE	Glycosyltransferase Family 20 protein	1.08626	2.60213	1.13973
116670	GT35	NPCWDE	Glycosyltransferase Family 35 protein	19.0212	32.6604	72.7334
68569	CBM1-CE1	NPCWDE	Carbohydrate-Binding Module Family 1 / Carbohydrate Esterase Family 1 protein	6.67158	0.518796	--
21396	CE15	NPCWDE	Carbohydrate Esterase Family 15 protein	4.55161	--	--
118322	CE15	NPCWDE	Carbohydrate Esterase Family 15 protein	24.3287	18.2151	38.7674
107901	CE16	NPCWDE	Carbohydrate Esterase Family 16 protein	16.0796	8.30075	15.233
87580	CBM1-CE16	NPCWDE	Carbohydrate-Binding Module Family 1 / Carbohydrate Esterase Family 16 protein	12.3862	9.62301	5.42667
110561	PL8_4	NPCWDE	Polysaccharide Lyase Family 8 protein	6.80336	2.54835	2.49061

## Sheet: G. subvermispora_ALL
Supplementary Table S1(F): Total proteome of G. subvermispora during cultivation on solid spruce wood during the time course of 8 weeks.
2w A = 2-week sample, A duplicate; 2w B = 2-week sample, B duplicate; 4w A = 4-week sample, A duplicate; 4w B = 4-week sample, B duplicate; 8w A = 8-week sample, A duplicate; 8w B = 8-week sample, B duplicate.
FDR = False discovery rate; IP values = Ion Profile values; # PSM = number of Peptide Spectrum Matches.
Protein FDR Confidence: Sequest HT	Accession	Coverage [%]	# Peptides	# PSMs	# Unique Peptides	MW [kDa]	IP: 2w A	IP: 2w B	IP: 4w A	IP: 4w B	IP: 8w A	IP: 8w B	predicted signal peptide	Merged_iprDesc
High	P02769_BSA	59	41	597	41	69.2	100	100	100	100	100	100
High	Cersu1_81663	43	44	352	44	130.8	10.8366	26.6519	15.6297	24.828	17.7784	18.8119	NO	Carbamoyl phosphate synthase, large subunit, N-terminal; Biotin/lipoyl attachment; Pyruvate carboxyltransferase; Conserved carboxylase region; Biotin carboxylase, C-terminal; Carbamoyl phosphate synthetase, large subunit, ATP-binding; Polynucleotide phosphorylase, phosphorolytic RNA-binding, bacterial/organelle-type; Pyruvate carboxylase; ATP-grasp fold; Biotin carboxylation region; Biotin-bindin…
High	Cersu1_93855	69	42	472	39	70.7	29.0404	29.3651	38.8743	60.1712	44.7675	63.478	NO	Heat shock protein 70; Heat shock protein Hsp70
High	Cersu1_80773	78	42	1301	42	72.1	681.791	795.265	125.452	199.714	248.172	283.119	NO	Glucose-methanol-choline oxidoreductase, N-terminal; Glucose-methanol-choline oxidoreductase, C-terminal; Glucose-methanol-choline oxidoreductase
High	Cersu1_112787	62	39	335	39	90	29.7327	25.8035	23.5263	23.9024	26.4118	21.9314	NO	Peptidase S16, Lon protease; AAA ATPase, core; AAA ATPase VAT, N-terminal; AAA+ ATPase, core; AAA ATPase, CDC48; TonB box, conserved site; AAA ATPase, conserved site; Aspartate decarboxylase-like fold
High	Cersu1_127662	40	38	304	38	125.7	15.2705	11.3815	14.4953	23.998	18.6046	20.7513	NO	ATP-citrate lyase/succinyl-CoA ligase; CoA-binding; ATP-citrate synthase; ATP-citrate lyase/succinyl-CoA ligase, active site; Succinyl-CoA ligase, alpha subunit; Citrate synthase-like, core; NAD(P)-binding; Succinyl-CoA synthetase-like
High	Cersu1_116670	57	38	433	38	98.4	22.0578	15.9847	30.8691	34.4517	88.1336	57.3332	NO	Glycosyl transferase, family 35; Glycogen/starch/alpha-glucan phosphorylase
High	Cersu1_62756	55	38	254	38	84.9	25.0771	27.7969	56.538	67.3229	20.592	15.4104	NO	Methionine synthase, vitamin-B12 independent; Cobalamin (vitamin B12)-independent methionine synthase MetE, N-terminal; 5-methyltetrahydropteroyltriglutamate--homocysteine S-methyltransferase
High	Cersu1_110414	52	35	352	35	93.6	35.7351	26.4571	33.7525	34.5247	30.053	22.3022	NO	Protein synthesis factor, GTP-binding; Translation elongation factor EFG/EF2, C-terminal; Translation elongation factor EFTu/EF1A, domain 2; Translation elongation factor EFG/EF2, domain IV; Small GTP-binding protein; Translation elongation and initiation factors/Ribosomal, beta-barrel; Elongation factor G, III and V
High	Cersu1_153213	48	34	493	34	79.3	63.1601	65.4794	64.8627	82.8551	67.5172	65.9972	NO	Heat shock protein Hsp90; ATP-binding region, ATPase-like
High	Cersu1_142155	46	32	219	32	86.4	13.6121	23.7006	11.5765	21.1034	8.03106	13.9588	NO	Heat shock protein 70; Heat shock protein Hsp70
High	Cersu1_56207	64	32	371	32	71.5	59.084	67.0802	65.1892	88.3578	68.4291	65.6708	NO	Transketolase, N-terminal; Transketolase, central region; Transketolase, C-terminal; Carbohydrate kinase, FGGY; Transketolase, C-terminal/Pyruvate-ferredoxin oxidoreductase, domain II
High	Cersu1_85744	55	32	300	31	85	31.2346	47.7169	29.0681	49.2995	20.0661	26.1735	NO	Aconitase/3-isopropylmalate dehydratase large subunit, alpha/beta/alpha; Aconitase A/isopropylmalate dehydratase small subunit, swivel; Aconitase, mitochondrial-like; Aconitase/3-isopropylmalate dehydratase, swivel
High	Cersu1_78973	76	30	483	25	54.1	231.09	248.182	123.054	160.618	126.327	105.849	NO	Aldehyde dehydrogenase; Aldehyde dehydrogenase, conserved site; Cytochrome P450; Aldehyde/histidinol dehydrogenase
High	Cersu1_111385	43	29	132	29	112.1	9.90993	19.8263	10.3435	21.1373	11.6696	17.0637	NO	Ubiquitin-activating enzyme, E1; UBA/THIF-type NAD/FAD binding fold; Ubiquitin-activating enzyme repeat; Molybdenum cofactor biosynthesis
High	Cersu1_81702	61	29	434	29	64.7	27.7272	22.769	26.3784	44.5065	44.0858	73.9592	NO	Dak kinase; Dak phosphatase; Helix-turn-helix, AraC type
High	Cersu1_116540	49	29	233	27	74.5	17.9745	17.4765	21.1475	28.2203	10.3004	10.8138	YES	Heat shock protein 70; Heat shock protein Hsp70
High	Cersu1_85225	44	28	198	28	82.6	35.6294	26.1292	29.0199	22.8015	32.223	18.2196	NO	Spermine synthase; Saccharopine dehydrogenase; NAD(P)-binding
High	Cersu1_84369	75	27	494	27	35.8	293.367	280.136	237.981	247.701	153.996	141.871	NO	Transaldolase; Transaldolase AB
High	Cersu1_120206	59	27	378	26	61.5	135.235	132.462	62.5488	88.807	84.9079	74.6844	NO	Phosphoglucose isomerase (PGI)
High	Cersu1_117684	45	27	225	27	60.2	25.8316	20.1955	30.6339	35.021	27.1816	25.078	NO	Malate synthase; Malate synthase A; Malate synthase-like, core
High	Cersu1_79320	67	27	561	27	53.6	202.141	198.784	209.835	276.577	221.662	208.664	NO	6-phosphogluconate dehydrogenase; 6-phosphogluconate dehydrogenase, C-terminal; 6-phosphogluconate dehydrogenase, NAD-binding; 6-phosphogluconate dehydrogenase, decarboxylating; 6-phosphogluconate-binding site; 6-phosphogluconate dehydrogenase, C-terminal-like; NAD(P)-binding
High	Cersu1_118059	72	27	318	27	52.4	49.5924	40.6088	45.1344	60.0217	30.6225	30.4916	NO	Aldehyde dehydrogenase; Aldehyde dehydrogenase, conserved site; Aldehyde/histidinol dehydrogenase
High	Cersu1_117120	39	27	132	27	94.4	24.1373	19.1418	7.79878	11.394	7.02522	8.82811	NO	Glycoside hydrolase, family 3, N-terminal; Glycoside hydrolase, family 3, C-terminal; PA14; Glycoside hydrolase, catalytic core
High	Cersu1_86589	39	27	282	27	81.8	25.5738	19.0798	37.0312	41.6972	42.1476	32.35	NO	Glycosyl transferase, group 1
High	Cersu1_80654	56	26	396	23	54.1	88.4339	93.0225	71.4798	98.981	109.646	91.4321	NO	Aldehyde dehydrogenase; Aldehyde dehydrogenase, conserved site; Aldehyde/histidinol dehydrogenase
High	Cersu1_144847	53	26	251	26	62.5	34.7518	29.7262	19.3994	19.252	18.8485	18.5433	NO	Chaperonin Cpn60; Chaperonin Cpn60/TCP-1; Chaperonin GroEL; GroEL-like chaperone, ATPase
High	Cersu1_111876	40	26	210	26	83.3	26.1439	25.5947	24.2155	26.8816	22.2688	19.219	YES	Peptidase S9, prolyl oligopeptidase active site region
High	Cersu1_89128	55	26	171	26	59.1	22.6654	16.3197	25.6162	25.6435	31.857	29.4222	NO	Pyridine nucleotide-disulphide oxidoreductase, NAD-binding region; FAD-dependent pyridine nucleotide-disulphide oxidoreductase; Pyridine nucleotide-disulphide oxidoreductase, class I; Rieske [2Fe-2S] region; FAD/NAD-linked reductase, dimerisation
High	Cersu1_105182	50	26	156	25	67.1	23.5102	15.6861	33.9836	21.4219	53.4713	9.86449	NO	Heat shock protein 70; Heat shock protein Hsp70
High	Cersu1_115053	61	25	139	25	52.4	6.7811	16.9713	6.39152	20.6731	10.0046	20.7983	NO	Peptidase M20; Peptidase M20, dimerisation; Glutathione degradosome, DUG1; ArgE/DapE/ACY1/CPG2/YscS, conserved site
High	Cersu1_102668	17	25	240	25	166.4	27.535	21.9988	25.7821	39.9844	15.2205	22.8058	NO	Calreticulin/calnexin; Protein synthesis factor, GTP-binding; Translation elongation factor EFG/EF2, C-terminal; Translation elongation factor EFTu/EF1A, domain 2; Translation elongation factor EFG/EF2, domain IV; Small GTP-binding protein; Concanavalin A-like lectin/glucanase; Translation elongation and initiation factors/Ribosomal, beta-barrel; Elongation factor G, III and V; Calreticulin/calne…
High	Cersu1_117741	50	25	221	25	62.8	29.3192	32.3659	33.7119	47.2355	16.2118	22.5878	NO	Cytochrome b5; Fumarate reductase/succinate dehydrogenase flavoprotein, N-terminal; Flavocytochrome c
High	Cersu1_82424	45	25	153	25	86.3	6.32197	10.1982	7.37607	12.7927	9.28203	10.6999	NO	WD40 repeat; PUL; PFU (PLAA family ubiquitin binding); WD40 repeat-like
High	Cersu1_84800	69	25	720	25	57.5	543.377	588.265	447.066	455.448	418.702	465.053	NO	Catalase; Catalase, N-terminal
High	Cersu1_94353	65	25	780	25	43.9	793.733	678.946	398.171	496.076	350.726	376.805	NO	D-isomer specific 2-hydroxyacid dehydrogenase, catalytic region; D-isomer specific 2-hydroxyacid dehydrogenase, NAD-binding; NAD(P)-binding
High	Cersu1_83193	30	24	108	24	105.9	5.24724	4.536	4.19109	4.29658	3.55375	2.69789	NO	Alanyl-tRNA synthetase, class IIc; Phosphoesterase, DHHA1; Threonyl/alanyl tRNA synthetase, SAD
High	Cersu1_110535	58	24	176	24	57.7	9.56208	12.4925	13.4248	21.8963	14.4914	17.7964	NO	Pyruvate kinase, barrel; Pyruvate kinase, alpha/beta; Pyruvate kinase; Pyruvate kinase, beta-barrel-like; Pyruvate/Phosphoenolpyruvate kinase, catalytic core; Pyruvate kinase, C-terminal-like
High	Cersu1_117324	67	24	288	24	45.4	30.3142	30.0008	50.1586	69.6619	88.2718	132.319	NO	Phosphoglycerate kinase; Phosphoglycerate kinase, conserved site
High	Cersu1_97352	44	24	152	24	79.5	12.8548	4.39401	10.2626	5.43236	7.6949	3.6913	NO	Prolyl-tRNA synthetase, class IIa; Aminoacyl-tRNA synthetase, class II (G, H, P and S); Anticodon-binding; Prolyl-tRNA synthetase, class II, C-terminal; Prolyl-tRNA synthetase, class IIa, prokaryotic-type; Aminoacyl-tRNA synthetase, class II; YbaK/aminoacyl-tRNA synthetase associated region; Prolyl-tRNA synthetase, class II
High	Cersu1_87979	72	24	330	24	47.1	91.6182	99.1829	72.6199	111.511	80.3196	99.9966	NO	Enolase
High	Cersu1_111274	52	24	306	24	57.1	34.0789	38.098	36.093	65.053	34.8943	47.0195	NO	Glucose-6-phosphate dehydrogenase; Peptidase, cysteine peptidase active site; NAD(P)-binding
High	Cersu1_84853	52	24	217	24	65.9	23.5929	27.3061	34.9683	48.918	15.6703	14.0557	NO	Pyridine nucleotide-disulphide oxidoreductase, NAD-binding region; FAD-dependent pyridine nucleotide-disulphide oxidoreductase; Pyridine nucleotide-disulphide oxidoreductase, class I; Adrenodoxin reductase; Flavin-containing monooxygenase FMO; HI0933-like protein
High	Cersu1_114758	49	24	158	23	56.1	18.2997	21.8211	26.4144	36.9956	26.6602	28.5707	NO	Amidase signature enzyme
High	Cersu1_84557	71	24	440	23	65.8	45.0177	39.1858	32.7019	42.802	47.6394	47.1377	NO	Glucose-methanol-choline oxidoreductase, N-terminal; Glucose-methanol-choline oxidoreductase, C-terminal; Glucose-methanol-choline oxidoreductase
High	Cersu1_117547	70	23	215	23	53.5	35.637	15.7029	27.5687	41.5409	9.79267	20.3616	NO	Homogentisate 1,2-dioxygenase; Haem peroxidase, plant/fungal/bacterial; Cupin, RmlC-type
High	Cersu1_114627	64	23	278	23	61.1	52.1146	41.1348	33.5691	50.6687	45.7606	51.8894	NO	Alpha-D-phosphohexomutase, N-terminal; Alpha-D-phosphohexomutase, C-terminal; Alpha-D-phosphohexomutase, alpha/beta/alpha domain I; Alpha-D-phosphohexomutase, alpha/beta/alpha domain II; Alpha-D-phosphohexomutase, alpha/beta/alpha domain III; Alpha-D-phosphohexomutase, conserved site; Alpha-D-phosphohexomutase, alpha/beta/alpha I, II and III
High	Cersu1_113807	42	23	229	23	73.9	37.9914	36.7821	26.9101	33.6209	12.4544	11.8138	NO	Transketolase, N-terminal; Transketolase, central region; Transketolase, C-terminal; Bacterial transketolase; Transketolase, C-terminal/Pyruvate-ferredoxin oxidoreductase, domain II
High	Cersu1_80500	29	23	161	23	97.6	43.5963	49.0376	18.6921	23.3982	18.1077	18.4555	NO	Glycoside hydrolase family 2, immunoglobulin-like beta-sandwich; Galactose-binding like; Glycoside hydrolase, catalytic core
High	Cersu1_115721	61	23	270	20	55.5	73.3152	79.7522	37.4557	41.6793	40.0333	31.3638	NO	Glycoside hydrolase, family 5; Glycoside hydrolase, catalytic core
High	Cersu1_115896	68	23	358	23	49.8	18.677	26.528	27.2158	49.9531	26.8805	41.4321	NO	Tubulin; Beta tubulin; Tubulin/FtsZ, GTPase; Tubulin/FtsZ, C-terminal; Beta tubulin, autoregulation binding site
High	Cersu1_91137	58	23	370	23	35.5	145	164.901	44.7433	59.3967	32.742	47.6897	NO	14-3-3 protein
High	Cersu1_117111	68	23	295	18	39.3	34.3887	25.5904	47.6899	57.6459	111.883	88.5776	NO	Aldo/keto reductase
High	Cersu1_82823	44	23	190	23	76.9	16.2089	15.6181	10.2677	14.4282	21.3454	12.3115	NO	Peptidase M49, dipeptidyl-peptidase III; Peptidase M49, dipeptidyl-peptidase 3, eukaryotic
High	Cersu1_62869	56	22	263	22	49.3	35.2343	40.0023	49.2385	63.2823	51.8634	55.9953	NO	Tubulin; Alpha tubulin; Tubulin/FtsZ, GTPase; Tubulin/FtsZ, C-terminal
High	Cersu1_110997	42	22	167	22	59.6	30.2158	26.625	9.05675	15.7844	13.5407	12.0849	NO	Aldehyde dehydrogenase; Delta-1-pyrroline-5-carboxylate dehydrogenase 1; Aldehyde dehydrogenase, conserved site; Aldehyde/histidinol dehydrogenase
High	Cersu1_82693	73	22	144	21	45.5	22.7838	24.6116	29.8923	47.6784	27.238	29.1291	NO	Aspartate/other aminotransferase; Aminotransferase, class I and II; Aminotransferases, class-I, pyridoxal-phosphate-binding site; Pyridoxal phosphate-dependent transferase, major region
High	Cersu1_114435	53	22	204	22	63.3	14.1599	16.2857	12.3432	18.9273	15.507	14.2304	NO	Phosphoenolpyruvate carboxykinase, N-terminal; Phosphoenolpyruvate carboxykinase, ATP-utilising; Phosphoenolpyruvate carboxykinase (ATP), conserved site
High	Cersu1_160722	63	22	147	21	55.2	8.2164	14.6788	21.218	39.6719	4.04778	5.93823	NO	Cytochrome b5; FMN-dependent alpha-hydroxy acid dehydrogenase; FMN-dependent alpha-hydroxy acid dehydrogenase, active site
High	Cersu1_80798	50	21	259	21	45.4	37.8184	33.7946	29.5143	39.1915	29.6405	32.7278	NO	Methionine synthase, vitamin-B12 independent
High	Cersu1_83640	51	21	116	21	53.4	26.7459	15.7674	12.1099	9.64417	11.5467	8.16397	NO	MmgE/PrpD; 2-methylcitrate dehydratase PrpD
High	Cersu1_110545	49	21	240	21	62.1	22.7723	23.8469	28.2116	45.0987	34.8681	43.7174	NO	Gamma-glutamyltranspeptidase
High	Cersu1_162491	81	21	364	19	35.4	134.162	96.0336	87.5063	105.275	54.9866	57.5279	NO	Lactate/malate dehydrogenase; L-lactate/malate dehydrogenase; Malate dehydrogenase, NAD-dependent, eukaryotes and gamma proteobacteria; Malate dehydrogenase, active site; NAD(P)-binding; Lactate dehydrogenase/glycoside hydrolase, family 4, C-terminal
High	Cersu1_86512	57	21	245	21	51.3	39.2779	33.7909	45.2376	53.5649	45.0337	35.4657	NO	Pyridine nucleotide-disulphide oxidoreductase, NAD-binding region; FAD-dependent pyridine nucleotide-disulphide oxidoreductase; Pyridine nucleotide-disulphide oxidoreductase, class I; Mercuric reductase; Pyridine nucleotide-disulphide oxidoreductase, dimerisation; Glutathione reductase, animal and bacterial; Pyridine nucleotide-disulphide oxidoreductase, class I, active site; FAD/NAD-linked reduc…
High	Cersu1_114284	65	21	171	21	51.5	20.0993	25.5953	36.7673	57.6606	28.6074	38.3959	NO	O-methyltransferase, family 2
High	Cersu1_86670	68	21	252	19	40.1	74.645	74.1266	62.1966	77.1344	36.2957	34.096	NO	Aldo/keto reductase; Potassium channel, voltage-dependent, beta subunit, KCNAB-related
High	Cersu1_67211	54	20	252	20	47.2	24.8083	40.7757	51.4888	79.923	46.7164	73.642	NO	S-adenosyl-L-homocysteine hydrolase, NAD binding; S-adenosyl-L-homocysteine hydrolase; NAD(P)-binding
High	Cersu1_90509	69	20	495	20	35.3	114.339	100.571	130.671	139.352	130.002	125.614	NO	Aldo/keto reductase
High	Cersu1_116469	44	20	172	20	47.2	35.4203	22.0646	28.2641	35.762	20.3019	32.8921	NO	Translation elongation factor EF1B, gamma chain, conserved; Glutathione S-transferase, C-terminal; Glutathione S-transferase, N-terminal; Glutathione S-transferase, C-terminal-like; Thioredoxin-like fold
High	Cersu1_85607	56	20	221	20	36.9	59.153	42.44	39.0332	28.7935	37.1993	26.2663	NO	Glutathione S-transferase, C-terminal; Glutathione S-transferase, predicted; Glutathione S-transferase, C-terminal-like; Thioredoxin-like fold
High	Cersu1_85824	71	20	341	18	36.2	81.4999	82.1547	69.3557	114.811	61.1182	73.811	NO	Lactate/malate dehydrogenase; L-lactate/malate dehydrogenase; Malate dehydrogenase, NAD-dependent, eukaryotes and gamma proteobacteria; Malate dehydrogenase, active site; NAD(P)-binding; Lactate dehydrogenase/glycoside hydrolase, family 4, C-terminal
High	Cersu1_139989	73	20	751	20	36.2	169.724	166.596	243.015	374.278	358.371	269.086	NO	Glyceraldehyde 3-phosphate dehydrogenase; Glyceraldehyde-3-phosphate dehydrogenase, type I; NAD(P)-binding
High	Cersu1_114198	44	20	113	20	63.8	16.7302	15.6695	12.1823	15.9209	15.1681	11.4905	NO	Dihydroxy-acid and 6-phosphogluconate dehydratase; Dihydroxy-acid dehydratase
High	Cersu1_132843	56	20	437	20	40.1	64.3742	63.7426	222.536	292.748	580.948	654.784	NO	Iron-containing alcohol dehydrogenase; Glycerol dehydrogenase; Aldehyde dehydrogenase, conserved site
High	Cersu1_97337	56	20	134	20	52.3	16.385	16.5668	24.3449	46.3446	12.7706	13.5452	NO	Glycine hydroxymethyltransferase; Pyridoxal phosphate-dependent transferase, major region
High	Cersu1_65670	54	20	156	20	48.3	30.548	22.1803	15.5165	17.9028	12.3227	7.44902	NO	Isocitrate/isopropylmalate dehydrogenase; Isocitrate dehydrogenase NADP-dependent, eukaryotic
High	Cersu1_139982	45	20	73	20	65.2	1.96519	1.84518	7.41385	12.5034	19.4096	17.0125	NO	Glucose-methanol-choline oxidoreductase, N-terminal; Glucose-methanol-choline oxidoreductase, C-terminal; Glucose-methanol-choline oxidoreductase
High	Cersu1_100028	69	20	297	14	41.7	55.4278	53.3685	77.4403	99.7259	91.6638	102.271	NO	Actin/actin-like; Actin, conserved site
High	Cersu1_64362	57	19	149	19	42.7	15.1644	27.1528	50.7924	79.8886	17.1453	21.4855	NO	S-adenosylmethionine synthetase
High	Cersu1_80720	67	19	146	19	40.6	18.0685	15.741	26.232	34.4368	20.0204	18.5388	NO	Thiolase; Thiolase-like
High	Cersu1_116692	21	19	60	19	119.5	1.57629	2.2216	3.5655	4.8375	5.34763	5.06082	NO	Flavodoxin-like; Flavoprotein pyridine nucleotide cytochrome reductase; Cytochrome P450; Cytochrome P450, E-class, group I; Oxidoreductase FAD/NAD(P)-binding; Flavodoxin/nitric oxide synthase; FAD-binding, type 1
High	Cersu1_116159	44	19	79	18	66.9	21.1419	29.0618	4.27485	8.06965	0.777219	2.1609	NO	Glucose-methanol-choline oxidoreductase, N-terminal; Glucose-methanol-choline oxidoreductase, C-terminal; Glucose-methanol-choline oxidoreductase
High	Cersu1_155077	70	19	274	19	39.5	40.6024	40.2756	36.951	49.6542	46.8903	43.401	NO	Oxidoreductase, N-terminal; Oxidoreductase, C-terminal; NAD(P)-binding
High	Cersu1_111314	51	19	276	19	55.9	31.5585	33.3062	29.0926	48.2316	12.5087	18.0084	YES	Thioredoxin-related; Thioredoxin domain; Disulphide isomerase; Protein disulphide isomerase; Thioredoxin-like fold
High	Cersu1_93603	73	19	171	19	31.6	28.2674	31.762	19.4735	20.9491	21.444	25.1167	NO	Aldo/keto reductase; Staphylococcal enterotoxin/Streptococcal pyrogenic exotoxin, conserved site
High	Cersu1_107720	37	19	176	19	67	12.4535	15.5486	19.2172	29.3909	34.9672	35.5092	NO	Thiamine pyrophosphate enzyme, central region; Thiamine pyrophosphate enzyme, C-terminal TPP-binding; Thiamine pyrophosphate enzyme, N-terminal TPP binding region; Pyruvate decarboxylase/indolepyruvate decarboxylase
High	Cersu1_155002	59	18	56	18	42.9	0.882589	1.17692	1.49319	1.89404	17.7559	29.4101	NO	Isopenicillin N synthase; 2OG-Fe(II) oxygenase
High	Cersu1_119302	61	18	478	18	37.5	113.298	73.5456	139.512	170.699	253.262	232.024	NO	NAD-dependent epimerase/dehydratase; N-6 adenine-specific DNA methylase, conserved site; NAD(P)-binding
High	Cersu1_117380	54	18	237	18	38.6	30.2199	34.6803	35.2482	54.663	70.2122	77.5449	NO	Aldo/keto reductase
High	Cersu1_79758	50	18	176	15	56	61.0203	49.2611	44.1272	48.6164	51.0358	38.3611	NO	Aldehyde dehydrogenase; Methylmalonate-semialdehyde dehydrogenase; Aldehyde dehydrogenase, conserved site; Aldehyde/histidinol dehydrogenase
High	Cersu1_42781	44	18	514	18	50.1	160.024	157.143	153.467	227.932	117.521	154.242	NO	Protein synthesis factor, GTP-binding; Translation elongation factor EFTu/EF1A, C-terminal; Translation elongation factor EFTu/EF1A, domain 2; Translation elongation factor EF1A, eukaryotic and archaeal; Translation elongation and initiation factors/Ribosomal, beta-barrel; Translation elongation factor EF1A/initiation factor IF2gamma, C-terminal
High	Cersu1_81164	33	18	101	18	77.1	30.5339	9.66187	15.6597	13.4578	17.5282	15.4401	NO	Peptidase M3A and M3B, thimet/oligopeptidase F; Peptidase M, neutral zinc metallopeptidases, zinc-binding site
High	Cersu1_162941	62	18	404	18	36.6	82.1885	69.954	124.778	203.008	149.744	122.86	NO	Alcohol dehydrogenase, zinc-binding; Alcohol dehydrogenase GroES-like; GroES-like; NAD(P)-binding
High	Cersu1_117254	17	18	76	18	139.3	6.64912	6.81664	5.61933	9.64104	9.2286	12.1905	NO	Amidohydrolase-like; Amidohydrolase 1; Metal-dependent hydrolase, composite
High	Cersu1_113657	74	18	186	18	27.7	21.4734	30.9566	28.3888	50.8663	48.189	70.1136	NO	Beta-lactamase-like; Hydroxyacylglutathione hydrolase
High	Cersu1_80596	58	18	298	18	40.5	38.1323	33.0553	68.7174	71.7058	159.411	130.455	NO	Isocitrate/isopropylmalate dehydrogenase; 3-isopropylmalate dehydrogenase
High	Cersu1_88416	43	18	158	10	56.5	16.1004	15.2889	17.5641	20.2083	25.646	39.166	NO	UTP--glucose-1-phosphate uridylyltransferase; UTP--glucose-1-phosphate uridylyltransferase, subgroup
High	Cersu1_110596	64	18	147	18	32.6	19.3679	18.1028	13.4707	20.3249	24.6894	20.8122	NO	Aldose 1-epimerase; Glycoside hydrolase-type carbohydrate-binding
High	Cersu1_113308	48	18	146	18	58	20.6337	11.2281	28.2807	34.3295	23.337	21.3224	NO	ATPase, F1/V1/A1 complex, alpha/beta subunit, nucleotide-binding; ATPase, F1/V1/A1 complex, alpha/beta subunit, C-terminal; ATPase, F1/V1/A1 complex, alpha/beta subunit, N-terminal; AAA+ ATPase, core; ATPase, F1 complex, beta subunit
High	Cersu1_112572	42	18	83	18	58.8	9.78742	7.83659	14.4654	21.7994	11.2263	14.0164	NO	ATPase, F1/V1/A1 complex, alpha/beta subunit, nucleotide-binding; ATPase, F1/V1/A1 complex, alpha/beta subunit, C-terminal; ATPase, F1/V1/A1 complex, alpha/beta subunit, N-terminal; ATPase, F1 complex, alpha subunit
High	Cersu1_80117	41	18	408	18	40.2	190.133	176.499	82.6637	91.4223	89.6361	70.9467	NO	Alcohol dehydrogenase, zinc-binding; Alcohol dehydrogenase GroES-like; Alcohol dehydrogenase class III/S-(hydroxymethyl)glutathione dehydrogenase; Alcohol dehydrogenase, zinc-containing, conserved site; GroES-like; NAD(P)-binding
High	Cersu1_112824	40	17	130	17	59.9	39.2185	19.6346	20.1763	19.5549	18.5025	8.98857	NO	Carbohydrate kinase, FGGY
High	Cersu1_84103	31	17	88	17	82.4	14.7267	7.7882	9.95401	8.69689	6.51163	6.2195	NO	Threonyl-tRNA synthetase, class IIa; Aminoacyl-tRNA synthetase, class II (G, H, P and S); TGS; Anticodon-binding; Threonyl/alanyl tRNA synthetase, SAD; Aminoacyl-tRNA synthetase, class II; TGS-like
High	Cersu1_111515	32	17	78	17	78	4.33506	4.19311	8.44062	9.03497	16.1891	11.2847	NO	Glycosyl hydrolase, family 13, catalytic region; Alpha-amylase, C-terminal all beta; Glycoside hydrolase, family 13, N-terminal; Glycosyl hydrolase, family 13, subfamily, catalytic region; Glycoside hydrolase, catalytic core; Immunoglobulin E-set
High	Cersu1_114803	49	17	165	9	42.9	24.9911	20.5875	21.6418	29.5648	56.1216	45.0046	NO	Aldo/keto reductase
High	Cersu1_116559	46	17	119	17	53	21.7106	20.5425	11.8731	19.0656	11.102	12.1538	NO	Homogentisate 1,2-dioxygenase; Cupin, RmlC-type
High	Cersu1_88243	67	17	134	17	40.6	32.5112	11.8766	36.2255	27.5333	32.3351	20.7037	YES	Thioredoxin-related; Thioredoxin domain; Endoplasmic reticulum, protein ERp29, C-terminal; Disulphide isomerase; Thioredoxin-like fold
High	Cersu1_43877	43	17	142	17	50.8	16.4554	24.1031	18.3513	32.4651	21.7717	43.5322	NO	20S proteasome, A and B subunits; Alkyl hydroperoxide reductase/ Thiol specific antioxidant/ Mal allergen; Thioredoxin-like fold
High	Cersu1_120461	50	17	139	12	54.2	35.6926	24.7863	23.3585	27.0085	47.8383	27.961	NO	Aldehyde dehydrogenase; Aldehyde dehydrogenase, conserved site; Aldehyde/histidinol dehydrogenase
High	Cersu1_147453	18	17	131	17	140.5	24.7135	22.1256	19.5961	25.9857	30.5114	23.5628	NO	D-isomer specific 2-hydroxyacid dehydrogenase, catalytic region; Proteasome/cyclosome, regulatory subunit; D-isomer specific 2-hydroxyacid dehydrogenase, NAD-binding; Hydroxymethylglutaryl-CoA reductase, class I/II, catalytic; Armadillo-type fold; NAD(P)-binding
High	Cersu1_114817	46	17	96	17	55.2	6.33139	9.01564	8.69575	20.8316	12.3723	29.5462	NO	Hexokinase
High	Cersu1_71180	28	17	85	17	99.9	15.6984	13.9849	11.1368	13.8914	12.5794	15.2566	NO	Protease-associated PA; Peptidase M28; Transferrin receptor-like, dimerisation
High	Cersu1_102127	23	16	28	16	113.1	6.8983	4.3692	0.993043	0.329915	0.83027	0.116981	NO	Pyridoxal phosphate-dependent decarboxylase; Pyridoxal phosphate-dependent transferase, major region
High	Cersu1_63524	55	16	233	16	28.7	75.2501	98.6769	49.8329	82.217	29.759	51.9759	NO	Glutathione S-transferase, N-terminal; Glutathione S-transferase, C-terminal-like; Thioredoxin-like fold
High	Cersu1_79465	65	16	140	16	33.6	32.5169	40.8836	39.5042	60.3936	41.7482	62.3987	NO	Inorganic pyrophosphatase
High	Cersu1_111681	31	16	60	16	83	2.01944	2.07809	2.87217	5.03869	4.28506	7.19027	NO	Aconitase/3-isopropylmalate dehydratase large subunit, alpha/beta/alpha; Aconitase A/isopropylmalate dehydratase small subunit, swivel; 3-isopropylmalate dehydratase, fused small/large subunits; 3-isopropylmalate dehydratase, large subunit region; 3-isopropylmalate dehydratase, small subunit region; Aconitase/3-isopropylmalate dehydratase, swivel
High	Cersu1_113475	26	16	66	16	101.2	5.30399	6.08486	5.25323	8.634	2.19323	3.46835	NO	Tetrahydrofolate dehydrogenase/cyclohydrolase; Formate-tetrahydrofolate ligase, FTHFS; NAD(P)-binding
High	Cersu1_117914	44	16	155	16	50.7	27.1704	15.8938	19.673	22.6992	17.0879	15.0463	NO	Citrate synthase-like; Citrate synthase, eukaryotic; Citrate synthase-like, core
High	Cersu1_87263	53	16	273	16	44.1	41.3509	38.2134	30.9697	44.6648	24.9456	22.6196	NO	Acetamidase/Formamidase
High	Cersu1_118401	66	16	287	16	36.8	76.9612	66.191	36.8305	43.6105	45.1632	49.7917	NO	Aldo/keto reductase
High	Cersu1_58921	35	16	124	8	56.7	5.98779	4.06086	7.27322	7.22805	8.33962	8.3858	NO	UTP--glucose-1-phosphate uridylyltransferase; UTP--glucose-1-phosphate uridylyltransferase, subgroup
High	Cersu1_116863	41	16	430	12	42.7	121.336	86.698	59.8957	69.1794	85.2197	61.2078	NO	Aldo/keto reductase
High	Cersu1_112583	39	16	224	9	59.1	46.3873	54.8971	71.6887	89.689	63.3374	65.5686	YES	Amidase signature enzyme
High	Cersu1_117230	60	16	193	16	45.8	30.6371	22.8816	23.9183	30.022	26.5685	20.6942	NO	Dimeric alpha-beta barrel
High	Cersu1_109209	34	16	77	16	63.3	7.85647	7.55843	8.67185	11.6227	10.8407	6.34918	NO	Carbohydrate kinase, FGGY; Pentulose kinase
High	Cersu1_117121	54	16	137	10	39.4	21.3644	25.71	24.7461	33.517	36.6743	30.9425	NO	Aldo/keto reductase
High	Cersu1_150644	54	16	108	16	46.1	10.8695	4.58189	17.5641	10.7573	12.6009	8.2252	NO	NADH:flavin oxidoreductase/NADH oxidase, N-terminal
High	Cersu1_111362	66	16	278	16	40.4	51.6579	50.3122	38.5533	52.5674	53.9396	54.6134	NO	GroES-related; Alcohol dehydrogenase, zinc-binding; Alcohol dehydrogenase GroES-like; Alcohol dehydrogenase, zinc-containing, conserved site; GroES-like; NAD(P)-binding
High	Cersu1_113512	46	16	109	15	56.8	21.4796	17.3568	11.4196	14.1849	9.02296	6.75259	NO	Coenzyme A transferase; 3-oxoacid CoA-transferase; 3-oxoacid CoA-transferase, subunit B; 3-oxoacid CoA-transferase, subunit A; Coenzyme A transferase active site
High	Cersu1_87891	56	16	236	16	37.3	50.0963	49.3014	40.8885	50.1239	36.2835	31.0184	NO	Alcohol dehydrogenase, zinc-binding; Alcohol dehydrogenase GroES-like; GroES-like; NAD(P)-binding
High	Cersu1_117192	60	16	133	14	37.7	14.7966	15.395	13.6673	18.6166	13.161	14.6522	NO	Alcohol dehydrogenase, zinc-binding; GroES-like; NAD(P)-binding
High	Cersu1_116975	54	16	103	16	37.7	5.84438	8.34175	9.64352	15.0595	25.8205	26.0079	NO	GroES-related; Alcohol dehydrogenase, zinc-binding; Alcohol dehydrogenase GroES-like; Alcohol dehydrogenase, zinc-containing, conserved site; GroES-like; NAD(P)-binding
High	Cersu1_44393	50	16	283	16	44.9	62.0366	53.9452	58.9528	71.9747	65.9513	60.5631	YES	Peptidase A1; Peptidase aspartic, active site; Peptidase aspartic, catalytic
High	Cersu1_85490	48	15	143	15	37.8	19.2803	21.5768	38.4412	51.2918	65.9181	73.4042	NO	Alcohol dehydrogenase, zinc-binding; Alcohol dehydrogenase GroES-like; GroES-like; NAD(P)-binding
High	Cersu1_87222	57	15	139	15	37.2	21.4278	19.9558	33.0502	44.2074	66.4104	59.6415	NO	Uricase
High	Cersu1_81960	61	15	157	9	27.2	28.795	102.992	32.4361	78.0703	49.932	80.2743	NO	Dienelactone hydrolase
High	Cersu1_115055	44	15	50	15	51.6	3.38989	4.82849	4.1394	5.97282	5.43669	6.09824	NO	UDP-glucose/GDP-mannose dehydrogenase, dimerisation; UDP-glucose/GDP-mannose dehydrogenase, C-terminal; UDP-glucose/GDP-mannose dehydrogenase, N-terminal; Nucleotide sugar dehydrogenase; 6-phosphogluconate dehydrogenase, C-terminal-like; NAD(P)-binding
High	Cersu1_90429	49	15	56	15	45.8	0.642342	1.60031	3.62234	4.33977	11.2917	11.1805	NO	Aromatic-ring hydroxylase; FAD dependent oxidoreductase
High	Cersu1_115835	33	15	87	15	71.6	5.68206	8.21837	9.80914	13.9185	8.82047	9.33142	NO	Peptidase S9, prolyl oligopeptidase active site region
High	Cersu1_83688	66	15	229	15	22.7	93.7341	107.34	43.1559	63.4794	45.1627	61.8074	NO	Manganese and iron superoxide dismutase
High	Cersu1_119636	47	15	84	14	50.5	21.1181	21.1968	11.0747	14.418	6.07664	9.66059	YES	Aromatic-ring hydroxylase; FAD dependent oxidoreductase
High	Cersu1_110651	23	15	27	15	99.8	7.5339	0.513887	6.47995	1.72377	10.5704	6.0198	NO	Chaperonin clpA/B; AAA ATPase, core; Clp, N-terminal; ATPase AAA-2; AAA+ ATPase, core; Prefoldin
High	Cersu1_116921	45	15	177	15	52.4	28.0317	35.6479	27.6107	41.5893	32.9308	48.4112	NO	Aldehyde dehydrogenase; Aldehyde dehydrogenase NAD(P)-dependent; Aldehyde dehydrogenase, conserved site; Aldehyde/histidinol dehydrogenase
High	Cersu1_115740	41	15	153	15	57.2	35.0776	25.2499	20.0803	26.9784	17.7513	20.9295	NO
High	Cersu1_110061	35	15	89	15	72	8.80474	8.16522	4.79374	8.09737	7.65218	6.19404	NO	Peptidase M1, membrane alanine aminopeptidase, N-terminal; Peptidase M1, leukotriene A4 hydrolase, aminopeptidase C-terminal; Peptidase M, neutral zinc metallopeptidases, zinc-binding site; Armadillo-type fold
High	Cersu1_85265	46	15	274	15	38.9	46.5337	46.9369	45.3279	82.5112	57.6664	76.6845	NO	Ketose-bisphosphate aldolase, class-II; Fructose-bisphosphate aldolase, class II, yeast/E. coli subtype
High	Cersu1_112759	27	15	128	15	63.2	16.9002	14.8639	14.7326	21.0861	14.4579	17.7502	NO	Peptidase M20; Peptidase M20, dimerisation; Peptidase M20, carboxypeptidase S; ArgE/DapE/ACY1/CPG2/YscS, conserved site
High	Cersu1_110360	49	15	82	15	46.3	10.8285	12.7941	8.34972	15.9442	14.6589	16.1012	NO	Oxidoreductase, N-terminal; NAD(P)-binding
High	Cersu1_110705	18	15	36	15	107.1	4.61297	1.53095	3.62686	2.21541	3.36551	1.63117	NO
High	Cersu1_81537	47	15	83	15	43.1	18.4885	15.2551	9.00958	12.8529	7.50845	7.66545	NO	Thiolase; Regulator of chromosome condensation, RCC1; Thiolase-like
High	Cersu1_113709	62	14	86	14	36	9.70311	10.2033	14.5143	17.6041	20.01	18.3679	NO	Aldo/keto reductase
High	Cersu1_118541	31	14	95	14	60.1	9.50154	12.5484	13.7947	17.3073	18.0735	14.2597	NO	BPG-independent PGAM, N-terminal; Cofactor-independent phosphoglycerate mutase/phosphopentomutase; Metalloenzyme; Phosphoglycerate mutase, 2,3-bisphosphoglycerate-independent; Alkaline-phosphatase-like, core domain
High	Cersu1_114504	59	14	181	14	34.7	38.8396	31.4449	33.5718	33.9451	23.8571	21.3477	NO	WD40 repeat; WD40 repeat-like
High	Cersu1_79019	27	14	102	14	67.9	42.8299	35.4542	20.1375	21.6496	21.4417	20.6538	NO	Pyridine nucleotide-disulphide oxidoreductase, NAD-binding region; FAD-dependent pyridine nucleotide-disulphide oxidoreductase
High	Cersu1_57316	44	14	86	14	29.5	13.8305	18.1481	11.7432	25.5073	16.2725	38.6544	NO	Glutathione S-transferase, omega-class; Glutathione S-transferase, N-terminal; Glutathione S-transferase, C-terminal-like; Thioredoxin-like fold
High	Cersu1_112935	52	14	98	14	29.7	22.7646	9.06667	13.0055	7.88783	7.8661	3.94052	NO	Ribosomal protein S4e, N-terminal and RNA-binding; KOW; Ribosomal protein S4e, central; RNA-binding S4; Ribosomal protein S4e, N-terminal; Ribosomal protein S4e
High	Cersu1_141460	65	14	141	14	32	12.3431	14.3799	11.5878	17.5835	12.065	15.1389	NO
High	Cersu1_86259	35	14	109	14	53	10.933	9.22321	9.53251	13.0396	21.701	17.6581	NO	Glycoside hydrolase, family 1; Glycoside hydrolase, catalytic core
High	Cersu1_113579	49	14	84	14	37.4	8.6364	7.88434	10.7616	11.1442	16.5022	15.6543	NO	Aldo/keto reductase
High	Cersu1_128978	47	14	90	13	46.6	13.6996	12.8614	12.3346	16.8841	8.73146	7.32527	NO	Aspartate/other aminotransferase; Aminotransferase, class I and II; Aminotransferases, class-I, pyridoxal-phosphate-binding site; Pyridoxal phosphate-dependent transferase, major region
High	Cersu1_118831	55	14	77	14	34.1	15.5624	19.0386	11.3907	17.2677	10.4716	12.7199	NO	Aldo/keto reductase
High	Cersu1_118496	27	14	87	14	100.5	5.04544	6.29118	8.02504	11.2819	14.1816	16.2841	YES	Glycoside hydrolase, family 3, N-terminal; Glycoside hydrolase, family 3, C-terminal; Glycoside hydrolase, catalytic core
High	Cersu1_117115	52	14	95	8	39.4	4.1652	3.38087	5.5632	7.00025	12.1474	9.93904	NO	Aldo/keto reductase
High	Cersu1_115632	47	14	53	11	40.3	5.37165	18.9966	0.733307	2.14602	0.0745438	0.127096	NO	NADH:flavin oxidoreductase/NADH oxidase, N-terminal
High	Cersu1_119239	32	14	71	14	72	5.30029	4.44123	7.28626	9.44403	6.76458	7.66162	NO	Calponin-like actin-binding; Actinin-type, actin-binding, conserved site; Calponin-homology
High	Cersu1_161458	52	14	120	14	28.3	7.47137	9.07187	22.2443	34.0773	33.1565	41.8872	NO	Dienelactone hydrolase
High	Cersu1_159950	42	14	74	14	49.7	7.78241	8.33788	7.88512	12.1824	5.51589	5.29602	NO	NUDIX hydrolase, core; NADH pyrophosphatase-like, N-terminal; NUDIX
High	Cersu1_115838	44	14	141	14	46.6	43.4134	33.4548	30.5036	28.9028	31.8374	16.0604	NO	Cys/Met metabolism, pyridoxal phosphate-dependent enzyme; O-acetylhomoserine/O-acetylserine sulfhydrylase; Pyridoxal phosphate-dependent transferase, major region
High	Cersu1_116123	46	14	100	12	51.5	6.19578	7.68939	6.26919	9.99684	10.1233	10.8615	NO	Mandelate racemase/muconate lactonizing enzyme, C-terminal; Mandelate racemase/muconate lactonizing enzyme
High	Cersu1_58612	21	14	57	10	93.8	5.40131	4.96836	10.5067	16.0258	6.16404	10.8784	NO	Haem peroxidase, animal; Haem peroxidase
High	Cersu1_113811	54	14	123	14	37	24.1462	16.8601	14.6356	16.1077	21.1953	21.5076	NO	Short-chain dehydrogenase/reductase SDR; Glucose/ribitol dehydrogenase; NAD(P)-binding
High	Cersu1_113917	41	14	106	14	36	29.2903	19.4224	26.9327	26.3274	18.7468	12.7955	NO	Tetrapyrrole biosynthesis, porphobilinogen synthase
High	Cersu1_112854	35	14	67	14	64.4	5.01927	4.09136	2.58871	3.64806	3.20628	2.64582	NO	AICARFT/IMPCHase bienzyme, formylation region; MGS-like; AICARFT/IMPCHase bienzyme
High	Cersu1_110498	73	14	194	14	31.8	34.3287	31.853	42.5697	58.8445	68.6608	67.0757	NO	Putative esterase; S-formylglutathione hydrolase
High	Cersu1_57604	21	14	138	14	82	56.5625	58.6427	23.9413	37.2406	6.21756	10.8265	NO	Histidine acid phosphatase; Signal recognition particle, SRP72 subunit, RNA-binding
High	Cersu1_111414	17	13	38	13	91	2.72353	26.8302	4.56405	5.56325	3.90239	5.10926	YES	Heat shock protein Hsp90; ATP-binding region, ATPase-like; Carbamoyl phosphate synthetase, large subunit, ATP-binding
High	Cersu1_113511	43	13	57	12	56.3	19.8337	4.38999	16.956	6.67038	13.985	5.85078	NO	Coenzyme A transferase; 3-oxoacid CoA-transferase; 3-oxoacid CoA-transferase, subunit B; 3-oxoacid CoA-transferase, subunit A
High	Cersu1_113951	21	13	53	13	110.7	5.61781	8.03811	4.62386	5.83644	5.88095	8.16819	YES	Glutamine amidotransferase, class-II
High	Cersu1_110043	59	13	83	13	29.6	11.5149	15.0798	10.4335	14.6264	10.0824	10.9504	NO	Short-chain dehydrogenase/reductase SDR; Glucose/ribitol dehydrogenase; NAD(P)-binding
High	Cersu1_118512	46	13	75	11	38.9	3.8565	4.41751	7.76592	8.53495	12.9984	13.3213	NO	Aldo/keto reductase
High	Cersu1_130402	19	13	55	12	105	2.25366	2.97627	3.83429	6.45114	7.73798	9.01109	NO	Amidohydrolase 1; Metal-dependent hydrolase, composite
High	Cersu1_59733	49	13	238	13	42.7	189.546	162.224	44.7169	75.3433	21.2153	16.4925	YES	Cellulose-binding region, fungal; Glycoside hydrolase, family 10; Glycoside hydrolase, catalytic core
High	Cersu1_110526	39	13	70	13	51	9.80342	10.5711	13.3628	16.4678	14.482	19.4513	NO	Cell division/GTP binding protein; Septin
High	Cersu1_110692	38	13	104	10	58.3	14.2896	4.67439	9.03817	3.86121	9.27115	3.03995	NO	Aldehyde dehydrogenase; Methylmalonate-semialdehyde dehydrogenase; Aldehyde dehydrogenase, conserved site; Aldehyde/histidinol dehydrogenase
High	Cersu1_81796	32	13	69	13	58.1	27.0665	32.4033	12.5529	13.2155	10.2452	9.67158	NO	Carbohydrate kinase, FGGY; Glycerol kinase
High	Cersu1_91268	43	13	64	13	52.4	19.4019	17.3346	3.94699	4.3902	1.98952	1.71114	NO	Amidohydrolase 1; Metal-dependent hydrolase, composite
High	Cersu1_111358	55	13	64	13	25.7	8.65647	13.7235	4.1839	15.9895	1.74834	7.57108	NO	Ribosomal protein L6E
High	Cersu1_114626	22	13	96	13	89.6	14.7561	16.7925	12.1681	17.9996	12.9963	14.9753	YES	Glycosyl hydrolase 92; Alpha-1,2-mannosidase, putative
High	Cersu1_112848	38	13	114	13	47.5	22.0264	19.085	20.2903	15.6305	28.2848	12.9767	NO	Argininosuccinate synthase
High	Cersu1_110782	46	13	82	13	39.3	14.1605	17.6238	16.1843	22.9118	19.1511	25.1628	NO	6-phosphogluconate dehydrogenase, NAD-binding; 6-phosphogluconate dehydrogenase, C-terminal-like; NAD(P)-binding
High	Cersu1_147137	51	13	145	13	45.9	17.6423	18.3859	14.2481	21.8382	29.4177	24.7335	NO	Aminotransferase, class V/Cysteine desulphurase; Pyridoxal phosphate-dependent transferase, major region
High	Cersu1_114818	55	13	69	13	33.6	16.2137	20.1021	9.87354	13.208	7.54099	7.89708	NO	MaoC-like dehydratase
High	Cersu1_118222	28	13	52	10	55.9	9.01067	4.03491	9.89759	11.7504	3.71007	2.75785	NO	Cytochrome b5; FMN-dependent alpha-hydroxy acid dehydrogenase; FMN-dependent alpha-hydroxy acid dehydrogenase, active site
High	Cersu1_82662	38	13	97	13	51.1	19.0491	22.5543	13.6996	15.3093	10.5208	8.93768	NO	Citrate synthase-like; Citrate synthase-like, core
High	Cersu1_113433	24	13	84	13	73.5	6.38402	6.48584	6.24649	7.7628	3.75835	4.96781	NO	RNA recognition motif, RNP-1; Polyadenylate-binding protein/Hyperplastic disc protein; RNA recognition, region 1; Polyadenylate binding protein, human types 1, 2, 3, 4
High	Cersu1_105022	28	13	43	13	66.2	6.3867	5.1841	4.86581	10.1751	4.43767	6.89477	NO	Glutamine amidotransferase, class-II; Asparagine synthase; Asparagine synthase, glutamine-hydrolyzing
High	Cersu1_88471	17	12	38	12	104.9	2.59502	4.24662	1.91897	4.56942	1.64494	3.79686	NO	Proteasome/cyclosome, regulatory subunit; 26S proteasome regulatory complex, non-ATPase subcomplex, Rpn1 subunit; Armadillo-type fold
High	Cersu1_119830	40	12	46	12	51.6	4.72084	4.19834	5.53681	8.25817	7.45118	7.38535	NO	Tubulin; Beta tubulin; Tubulin/FtsZ, GTPase; Tubulin/FtsZ, C-terminal
High	Cersu1_109859	59	12	89	7	37.2	17.1509	15.2502	13.543	15.9798	6.83292	5.28896	NO	Tetrapyrrole biosynthesis, hydroxymethylbilane synthase
High	Cersu1_80390	46	12	82	12	34.7	18.7808	11.8363	12.3211	10.7501	8.24998	6.60204	NO	Ribosomal protein L18/L5; Ribosomal protein L5, eukaryotic
High	Cersu1_112610	44	12	107	12	44.5	43.247	36.8196	23.1417	30.5116	14.2939	13.368	NO	Aminotransferase, class V/Cysteine desulphurase; Pyridoxal phosphate-dependent transferase, major region
High	Cersu1_127368	53	12	114	12	52.2	16.0329	10.4931	11.02	7.84509	7.01244	11.0507	YES	Aldose 1-epimerase; Glycoside hydrolase-type carbohydrate-binding
High	Cersu1_84184	45	12	173	12	32.1	22.6215	22.9738	25.4765	30.4707	36.5628	31.9651	NO	Crotonase, core
High	Cersu1_111939	59	12	135	12	34.4	18.481	21.7651	14.5776	20.8805	30.1426	31.3199	NO	Short-chain dehydrogenase/reductase SDR; Glucose/ribitol dehydrogenase; NAD(P)-binding
High	Cersu1_88457	54	12	147	12	36.5	19.5729	17.0922	16.4815	20.2577	19.6911	16.7905	NO	Alcohol dehydrogenase, zinc-binding; Alcohol dehydrogenase GroES-like; GroES-like; NAD(P)-binding
High	Cersu1_135553	22	12	36	12	88.7	4.91391	7.84546	2.012	2.46049	2.66488	1.42401	NO	Glycoside hydrolase, family 31; Glycoside hydrolase, catalytic core
High	Cersu1_117552	64	12	112	12	28.7	13.7091	15.4646	17.4202	20.838	18.0828	19.5165	NO	Short-chain dehydrogenase/reductase SDR; Glucose/ribitol dehydrogenase; NAD(P)-binding
High	Cersu1_119710	38	12	50	12	41.3	13.3011	6.18697	4.56606	4.67787	1.96885	1.18822	NO	Ribosomal protein L4/L1e; Ribosomal protein L4/L1e, eukaryotic/archaeal, conserved site
High	Cersu1_121736	67	12	128	11	25.7	16.935	22.8898	25.5695	38.9008	3.46786	4.76827	NO	Glucose/ribitol dehydrogenase; Short-chain dehydrogenase/reductase SDR; NAD(P)-binding
High	Cersu1_110870	49	12	89	12	35.2	18.1945	19.1356	26.1573	31.1085	42.2882	51.7542	NO	Polysaccharide deacetylase; Glycoside hydrolase/deacetylase, beta/alpha-barrel
High	Cersu1_80071	58	12	92	12	32.1	7.05618	4.30711	10.4539	20.7659	10.4475	14.6929	NO	Fumarylacetoacetase, C-terminal-like; Fumarylacetoacetase, C-terminal-related
High	Cersu1_96047	34	12	64	12	51.4	6.01022	8.02688	4.90409	9.54188	6.99549	11.2928	NO	Aldehyde dehydrogenase; Aldehyde dehydrogenase, conserved site; Aldehyde/histidinol dehydrogenase
High	Cersu1_46957	41	12	137	5	36.7	2.1099	2.42844	4.34761	6.74343	8.17903	7.30827	NO	Amidase signature enzyme
High	Cersu1_114686	26	12	35	12	71.7	5.81405	2.47002	5.22795	2.52238	2.97444	1.38171	NO	AMP-dependent synthetase and ligase; Acetate--CoA ligase
High	Cersu1_91802	32	12	72	12	49.6	16.8708	11.4759	8.46703	9.16497	6.32827	6.29631	NO	Acyl-CoA oxidase/dehydrogenase, type 1; Acyl-CoA dehydrogenase/oxidase, central region; Acyl-CoA dehydrogenase/oxidase C-terminal; Acyl-CoA dehydrogenase/oxidase, middle and N-terminal
High	Cersu1_118403	45	12	84	12	37.8	23.9525	20.7745	13.9302	17.0608	10.2801	12.4161	NO	Alcohol dehydrogenase, zinc-binding; GroES-like; NAD(P)-binding
High	Cersu1_112874	61	12	116	6	27.2	5.37437	7.11905	5.73309	10.8936	13.7347	18.7715	NO	Dienelactone hydrolase
High	Cersu1_111474	18	12	43	12	94.1	2.20254	3.17162	2.39233	4.80536	2.07945	2.29275	NO	Glutamyl/glutaminyl-tRNA synthetase, class Ic; Glutaminyl-tRNA synthetase, class Ic; Aminoacyl-tRNA synthetase, class I, conserved site; Ribosomal protein L25/Gln-tRNA synthetase, anti-codon-binding
High	Cersu1_108211	39	12	67	12	44.2	7.49523	11.4544	9.76351	12.1303	10.2288	12.1292	NO	Acetohydroxy acid isomeroreductase C-terminal; Acetohydroxy acid isomeroreductase, catalytic; Ketol-acid reductoisomerase, fungi; Acetohydroxy acid isomeroreductase; 6-phosphogluconate dehydrogenase, C-terminal-like; NAD(P)-binding
High	Cersu1_118332	41	11	56	11	43.8	2.54168	3.27147	5.48857	5.90584	12.6578	12.0796	NO	Phosphatidylserine decarboxylase-related; Phosphatidylserine decarboxylase
High	Cersu1_62068	17	11	69	11	98.3	4.62888	5.25811	5.19404	8.2023	7.56465	7.90281	NO	Glutamine amidotransferase, class-II; Alpha-D-phosphohexomutase, alpha/beta/alpha domain I; Alpha-D-phosphohexomutase, alpha/beta/alpha domain II; Alpha-D-phosphohexomutase, alpha/beta/alpha I, II and III
High	Cersu1_152953	34	11	59	11	36.3	6.31188	8.14328	8.88997	11.586	10.6691	9.57892	NO	Cell division/GTP binding protein; Septin
High	Cersu1_129868	51	11	60	10	30	1.27775	1.90691	7.12115	12.1719	16.1413	21.1178	NO	Alcohol dehydrogenase, zinc-binding; Alcohol dehydrogenase GroES-like; GroES-like; NAD(P)-binding
High	Cersu1_119781	38	11	141	11	25.4	74.274	80.1808	48.0757	60.945	65.2859	67.1371	NO	Glutathione S-transferase, C-terminal; Glutathione S-transferase, N-terminal; Glutathione S-transferase, C-terminal-like; Thioredoxin-like fold
High	Cersu1_131900	24	11	87	11	64.3	9.96219	9.77758	12.9801	18.0369	18.1705	16.4503	NO	Thiamine pyrophosphate enzyme, central region; Thiamine pyrophosphate enzyme, C-terminal TPP-binding; Thiamine pyrophosphate enzyme, N-terminal TPP binding region
High	Cersu1_119060	28	11	44	11	59.8	6.71004	7.08281	6.14379	11.2298	5.16998	4.26854	NO	Galactokinase; Mevalonate and galactokinase; GHMP kinase; GHMP kinase, C-terminal; GHMP kinase, ATP-binding, conserved site
High	Cersu1_140571	35	11	64	5	39.1	2.75571	3.00238	0.29825	0.496099	0.180086	0.0806011	NO	Aldo/keto reductase
High	Cersu1_84897	15	11	44	11	119.4	31.4392	32.3542	26.4247	53.076	33.7564	40.1235	NO	Valyl-tRNA synthetase, class Ia; Aminoacyl-tRNA synthetase, class Ia; Valyl/Leucyl/Isoleucyl-tRNA synthetase, class I, anticodon-binding; Aminoacyl-tRNA synthetase, class I, conserved site; tRNA-binding arm; Aminoacyl-tRNA synthetase, class 1a, anticodon-binding; Valyl/Leucyl/Isoleucyl-tRNA synthetase, class Ia, editing
High	Cersu1_88901	32	11	49	11	41.3	5.96937	8.07058	11.3151	18.8425	3.81006	4.11088	NO	Polyprenyl synthetase; Terpenoid synthase
High	Cersu1_80494	58	11	134	11	24.2	39.3954	55.4313	32.2373	53.2493	34.4646	41.8518	NO	ThiJ/PfpI
High	Cersu1_86064	58	11	238	9	26.8	62.7498	61.6152	105.699	135.898	147.634	169.177	NO	Glutathione S-transferase, C-terminal-like; Thioredoxin-like fold
High	Cersu1_118210	21	11	47	11	72	14.1667	16.0451	16.1941	22.9224	18.0611	16.0705	NO	Heat shock protein 70; Protein of unknown function DUF28; Heat shock protein Hsp70; Chaperone DnaK
High	Cersu1_84792	20	11	120	11	82.6	35.9196	42.5115	24.3704	28.3875	8.98216	14.3985	YES	Glucose-methanol-choline oxidoreductase, C-terminal; FAD-dependent pyridine nucleotide-disulphide oxidoreductase; Glucose-methanol-choline oxidoreductase, N-terminal; Carbohydrate-binding family 9/cellobiose dehydrogenase, cytochrome
High	Cersu1_114655	31	11	44	11	69.1	5.95374	5.1367	5.26085	5.6661	4.43675	4.46068	NO	Peptidase S33, tripeptidyl-peptidase C-terminal
High	Cersu1_117755	38	11	45	11	43.3	5.87439	29.1587	7.42579	120.051	4.48392	63.0187	NO	GHMP kinase; GHMP kinase, C-terminal; Diphosphomevalonate decarboxylase
High	Cersu1_115004	49	11	88	11	34.1	10.3571	10.1113	12.381	17.6262	19.6327	17.18	NO	NmrA-like; NAD(P)-binding
High	Cersu1_110169	54	11	367	11	28	101.732	116.703	179.215	272.393	196.537	269.799	NO	Dienelactone hydrolase
High	Cersu1_128798	40	11	62	11	42.4	5.18725	3.80078	9.67296	7.25454	12.4621	15.8642	NO	Cell division/GTP binding protein; Septin
High	Cersu1_80320	28	11	61	11	43.6	15.4337	11.096	9.98852	7.39858	6.33572	4.50673	NO	Ribosomal protein L3; Translation elongation and initiation factors/Ribosomal, beta-barrel
High	Cersu1_84587	61	11	162	11	29.9	27.01	33.5288	40.5705	71.7639	26.2422	33.8288	NO	Methyltransferase type 11
High	Cersu1_69697	73	11	85	11	22.7	19.8933	22.7314	13.0956	21.5415	9.86788	12.2476	NO	Nitroreductase
High	Cersu1_112991	43	11	66	11	38.7	15.1043	12.1407	11.3399	14.8557	8.71826	8.93227	NO	Alcohol dehydrogenase, zinc-binding; Alcohol dehydrogenase GroES-like; GroES-like; NAD(P)-binding
High	Cersu1_115252	30	10	23	9	65.9	0.213631		0.750156	0.554537	5.2642	9.72911	NO	Glucose-methanol-choline oxidoreductase, N-terminal; Glucose-methanol-choline oxidoreductase, C-terminal; Glucose-methanol-choline oxidoreductase
High	Cersu1_79448	56	10	44	10	29.9	6.68688	7.05458	5.73501	9.56815	6.93393	8.10281	NO	Dienelactone hydrolase
High	Cersu1_87199	48	10	86	10	30.8	6.85267	7.75282	12.4456	15.5136	16.1511	16.8585	NO
High	Cersu1_116134	46	10	111	10	36.3	25.2952	25.2456	14.4171	17.8783	14.4885	19.5324	NO	Intradiol ring-cleavage dioxygenase, C-terminal; Catechol dioxygenase, N-terminal; Intradiol ring-cleavage dioxygenase, core
High	Cersu1_80123	26	10	66	10	50.9	7.9505	10.213	11.6917	15.5275	14.5393	11.9105	NO	FAD linked oxidase, N-terminal; Berberine/berberine-like; FAD-binding, type 2
High	Cersu1_79624	26	10	29	10	61	4.08748	1.31249	3.22375	2.28698	6.37153	3.70933	NO	Amidase signature enzyme; Amidase, fungi type
High	Cersu1_137179	21	10	112	3	43.1	5.0657	2.9984	5.45196	5.00679	4.44367	3.61185	NO	Aldo/keto reductase
High	Cersu1_49192	66	10	99	10	23.5	7.78626	7.46331	14.0851	22.8884	17.4565	24.4313	NO
High	Cersu1_117774	15	10	58	10	105.8	8.05108	12.5609	4.27201	6.45096	4.58673	6.59781	YES	Glycoside hydrolase family 2, immunoglobulin-like beta-sandwich; Galactose-binding like; Glycoside hydrolase, catalytic core
High	Cersu1_126750	10	10	65	10	133.5	5.31135	4.52289	9.51467	12.4458	10.1119	12.86	NO	Adenosine kinase; Carbohydrate/purine kinase; Protein-tyrosine phosphatase, catalytic; Protein-tyrosine phosphatase; Carbohydrate/puine kinase, PfkB, conserved site
High	Cersu1_110074	29	10	49	10	49	7.82718	11.7501	11.617	17.7013	13.3331	15.6085	NO	DNA/RNA helicase, DEAD/DEAH box type, N-terminal; DNA/RNA helicase, C-terminal; DEAD-like helicase, N-terminal; Helicase, superfamily 1 and 2, ATP-binding; RNA helicase, DEAD-box type, Q motif
High	Cersu1_84740	21	10	42	10	72.8	9.07572	5.50216	6.3124	5.48726	5.91306	4.09819	NO	Glycyl-tRNA synthetase, alpha2 dimer; Aminoacyl-tRNA synthetase, class II (G, H, P and S); Anticodon-binding; Aminoacyl-tRNA synthetase, class II
High	Cersu1_80875	35	10	63	10	43.3	15.7406	15.7087	10.7036	14.1907	4.50999	6.10301	NO	Aldo/keto reductase
High	Cersu1_89134	61	10	96	10	17.9	17.4908	25.847	12.1258	24.2175	13.7077	20.0494	NO	Cyanase; Cyanate lyase, C-terminal; Lambda repressor-like, DNA-binding
High	Cersu1_83802	19	10	54	10	62	6.70278	5.37285	11.3512	11.7605	3.87329	2.77154	NO	Glycoside hydrolase, family 1; Glycoside hydrolase, catalytic core
High	Cersu1_88417	46	10	107	10	24	30.4382	24.9409	16.9375	20.0491	11.3366	10.1092	NO	Ribosomal protein S8e
High	Cersu1_110453	32	10	54	10	46.7	8.54957	9.40936	6.62259	13.474	6.71456	8.98878	NO	NADH:flavin oxidoreductase/NADH oxidase, N-terminal
High	Cersu1_113651	43	10	36	10	37.4	10.7339	6.54991	3.35047	4.26186	1.04057	1.54627	NO	2-nitropropane dioxygenase, NPD
High	Cersu1_114286	34	10	52	10	41.6	15.5236	14.5077	4.86738	6.22703	2.87371	3.13289	NO	Iron-containing alcohol dehydrogenase
High	Cersu1_117862	48	10	81	10	31.6	23.8574	21.4721	15.7444	18.0188	10.5782	11.2282	NO	Glucosamine/galactosamine-6-phosphate isomerase; Glucosamine-6-phosphate isomerase
High	Cersu1_112857	45	10	193	10	27.1	29.2147	32.0807	36.8568	58.7636	46.6373	55.9136	NO	Dienelactone hydrolase
High	Cersu1_85576	26	10	29	10	60.2	1.16385	3.37247	2.63119	4.94117	3.85982	4.61588	NO	Malic oxidoreductase; Malic enzyme, N-terminal; Malic enzyme, NAD-binding; Malic enzyme, conserved site; NAD(P)-binding
High	Cersu1_150918	43	10	118	10	32.3	14.3427	12.6389	37.3753	43.5581	37.0964	31.7676	YES	Saccharopine dehydrogenase; NAD(P)-binding
High	Cersu1_118165	39	10	48	10	37	8.33382	10.1456	5.7527	7.31956	5.14743	6.84974	NO	D-isomer specific 2-hydroxyacid dehydrogenase, catalytic region; D-isomer specific 2-hydroxyacid dehydrogenase, NAD-binding; NAD(P)-binding
High	Cersu1_111324	36	10	60	10	40.2	9.84257	5.94267	6.73403	6.26862	5.92852	3.61924	NO	Isocitrate/isopropylmalate dehydrogenase; Isocitrate dehydrogenase NAD-dependent, mitochondrial
High	Cersu1_75111	26	10	28	10	73	18.4583	10.05	6.8206	3.70725	1.87323	2.27625	YES	Carboxylesterase, type B; C-type lectin fold
High	Cersu1_117286	15	10	20	10	78.3	1.65685	1.51023	1.88709	3.20366	1.42506	2.25314	NO	Dynamin, GTPase region; Dynamin central region; Dynamin GTPase effector
High	Cersu1_99192	43	10	46	9	38.6	0.482371	1.30142	3.06555	6.50084	7.89098	14.9352	NO	Aldo/keto reductase
High	Cersu1_116405	49	10	37	10	33.5	5.84882	6.32806	4.03554	6.63046	6.55614	5.96497	NO	dTDP-4-dehydrorhamnose reductase; SANT, DNA-binding; Oxidoreductase, molybdopterin binding; NAD(P)-binding
High	Cersu1_97858	43	10	100	8	44.4	42.8552	43.7719	13.238	18.6951	2.14698	3.51802	YES	Cellulose-binding region, fungal; Glycoside hydrolase, family 10; Glycoside hydrolase, catalytic core
High	Cersu1_94644	46	10	165	10	37.1	30.9464	26.1086	56.0558	73.1139	91.6822	87.0067	NO	Alpha/beta hydrolase fold-1; Homoserine acetyltransferase
High	Cersu1_111255	28	10	76	10	55.4	25.1719	21.6669	12.3917	12.6833	10.3303	8.7286	NO	Iron-containing alcohol dehydrogenase
High	Cersu1_113249	18	10	15	10	85.2	1.45596	0.986127	0.672843	0.683028	0.587268	0.422585	YES	Glutamyl/glutaminyl-tRNA synthetase, class Ic; Glutathione S-transferase, C-terminal; Glutamyl-tRNA synthetase, class Ic, archaeal/eukaryotic cytosolic; Aminoacyl-tRNA synthetase, class I, conserved site; Glutathione S-transferase, C-terminal-like; Ribosomal protein L25/Gln-tRNA synthetase, anti-codon-binding
High	Cersu1_120101	31	10	41	10	42	3.18533	2.96806	3.74861	5.43722	7.1318	7.05972	NO	Nucleotide sugar epimerase; NAD-dependent epimerase/dehydratase; UDP-glucose 4-epimerase; NAD(P)-binding
High	Cersu1_116561	16	10	44	10	94.5	3.87043	3.38162	3.6654	4.85909	4.94884	5.64255	NO	HEAT; Importin-beta, N-terminal; Armadillo; Carbamoyl phosphate synthetase, large subunit, ATP-binding; Armadillo-type fold
High	Cersu1_110324	29	10	62	10	53.5	9.0237	7.1228	7.09534	10.4183	11.4881	17.7434	NO	Delta crystallin; Fumarate lyase; Fumarate hydratase, class II; L-Aspartase-like
High	Cersu1_108815	50	10	34	10	37.8	0.791297	3.36359	3.94766	6.68031	5.32578	5.8523	NO	SMP-30/Gluconolaconase/LRE-like region
High	Cersu1_111964	40	10	101	10	36.9	41.9323	37.5622	17.4049	25.0043	12.2058	11.0758	NO	Alcohol dehydrogenase, zinc-binding; Alcohol dehydrogenase GroES-like; Quinone oxidoreductase putative, PIG3; GroES-like; NAD(P)-binding
High	Cersu1_125904	25	10	135	7	59.2	6.69846	13.4246	37.691	55.967	64.478	84.3734	YES	Carboxylesterase, type B
High	Cersu1_82587	45	10	66	10	37.3	6.11258	7.57469	8.5687	11.9496	10.4817	12.7556	NO	Inositol phosphatase/fructose-1,6-bisphosphatase
High	Cersu1_117828	45	10	129	10	31.8	53.2915	63.2028	37.9619	53.5879	24.1335	32.2577	NO	Ribosomal protein S2; Ribosomal protein S2, eukaryotic/archaeal
High	Cersu1_111921	47	10	82	10	36.9	21.4331	20.8569	20.4514	34.6805	14.6954	27.6297	NO	Pyridine nucleotide-disulphide oxidoreductase, NAD-binding region; FAD-dependent pyridine nucleotide-disulphide oxidoreductase; Adrenodoxin reductase; Pyridine nucleotide-disulphide oxidoreductase, class-II; Thioredoxin reductase; Pyridine nucleotide-disulphide oxidoreductase, class-II, active site
High	Cersu1_112219	52	10	47	10	20.6	6.27572	9.17882	10.5903	13.17	4.61201	11.8241	NO	Thioredoxin-like; Alkyl hydroperoxide reductase/ Thiol specific antioxidant/ Mal allergen; Thioredoxin-like fold
High	Cersu1_113245	29	10	64	9	45	11.0967	12.6893	15.0453	20.2924	14.6397	15.3195	NO	DNA/RNA helicase, DEAD/DEAH box type, N-terminal; DNA/RNA helicase, C-terminal; DEAD-like helicase, N-terminal; Helicase, superfamily 1 and 2, ATP-binding; RNA helicase, DEAD-box type, Q motif
High	Cersu1_116228	21	10	52	10	64.9	11.7705	17.3648	13.663	12.8151	16.4532	9.15816	NO	WD40 repeat; WD40 repeat-like
High	Cersu1_116436	44	10	58	10	28.1	17.0563	17.0065	3.39563	4.33645	2.38965	2.14527	NO	Metal-dependent phosphohydrolase, HD region, subdomain; Cyanamide hydratase, HD-type
High	Cersu1_118311	26	9	25	9	60.6	3.75476	8.46104	3.02083	12.0073	2.02426	7.97959	NO	Myo-inositol-1-phosphate synthase, GAPDH-like; Myo-inositol-1-phosphate synthase; NAD(P)-binding
High	Cersu1_120156	36	9	238	9	25	497.953	436.785	345.721	429.383	242.407	205.102	NO	Glutathione S-transferase, C-terminal; Glutathione S-transferase, N-terminal; Glutathione S-transferase, C-terminal-like; Thioredoxin-like fold
High	Cersu1_112224	23	9	45	9	54.5	6.70384	11.06	6.14109	5.84707	6.79311	5.47056	NO
High	Cersu1_85726	16	9	31	9	75.8	2.87278	3.22971	4.29814	5.8173	3.22154	3.67507	NO	AMP-dependent synthetase and ligase
High	Cersu1_125669	22	9	45	9	53.6	1.22922	2.04482	5.13715	7.2611	10.4606	12.2761	NO	Amidase signature enzyme; Helix-turn-helix, AraC type
High	Cersu1_119911	38	9	83	9	35.7	14.3181	18.7408	10.4294	14.5952	10.472	10.4972	NO	Alpha/beta hydrolase; Peptidase S33, prolyl aminopeptidase; Alpha/beta hydrolase fold-1; Peptidase S33, proline iminopeptidase 1
High	Cersu1_85285	25	9	50	9	55.7	8.71697	9.44129	6.14528	8.0578	3.64411	4.56908	NO	Glycoside hydrolase, clan GH-D; Glycoside hydrolase, family 27; Glycoside hydrolase, catalytic core
High	Cersu1_80722	34	9	61	9	29.5	13.7238	11.0288	13.876	16.0684	7.33791	6.84021	NO	Ribosomal protein S3Ae
High	Cersu1_112030	15	9	24	9	112.2	4.41134	4.31517	3.29479	5.40314	1.36065	4.92655	NO	Dehydrogenase, E1 component; Transketolase, central region; 2-oxoglutarate dehydrogenase, E1 component
High	Cersu1_156335	24	9	29	9	55.2	5.12758	4.61717	5.05788	7.75336	3.89685	3.12296	NO
High	Cersu1_118608	23	9	30	9	54.2	2.42319	2.92805	2.54927	5.20414	3.71611	4.24933	NO	UTP--glucose-1-phosphate uridylyltransferase
High	Cersu1_118721	37	9	51	9	30	16.5138	14.2102	9.76848	11.0118	5.62494	6.27156	NO	Ribosomal protein L7Ae/L30e/S12e/Gadd45; Ribosomal protein L7Ae; Ribosomal protein L7A
High	Cersu1_112151	38	9	52	9	39.8	4.45821	6.06592	5.26664	7.39936	5.21767	7.15276	NO	Coproporphyrinogen III oxidase
High	Cersu1_115773	27	9	67	9	44.4	4.36304	5.0934	7.47984	9.77657	9.31639	13.6126	NO	Cell division/GTP binding protein; Septin
High	Cersu1_80270	55	9	57	9	21.9	3.75067	4.2307	7.30728	14.6575	6.4812	12.585	NO	RHO protein GDP dissociation inhibitor; Immunoglobulin E-set
High	Cersu1_155413	20	9	117	9	71.3	13.0005	14.993	14.0864	20.8789	16.7201	23.2398	YES	Peptidase S41
High	Cersu1_81392	23	9	37	9	57.9	19.576	10.2548	16.2521	11.9557	20.3954	9.58835	NO	Cdc37, N-terminal; Cdc37, C-terminal; Cdc37, Hsp90 binding; Calcium-binding EF-hand
High	Cersu1_41345	23	9	37	9	54.4	5.46169	3.05048	5.45028	5.90607	4.34375	3.22126	NO	Cytochrome b5; FMN-dependent alpha-hydroxy acid dehydrogenase
High	Cersu1_113712	27	9	55	9	49.3	7.41129	6.28974	4.59813	7.32501	5.92469	5.14833	NO	FAD-dependent pyridine nucleotide-disulphide oxidoreductase
High	Cersu1_88363	37	9	49	9	36.2	13.7786	12.7049	9.4359	11.6282	4.66514	2.1955	NO	Dihydrodipicolinate synthetase
High	Cersu1_159874	11	9	159	9	97	33.9131	32.9762	43.5463	58.7217	31.8995	42.6238	YES	Peptidase S8 and S53, subtilisin, kexin, sedolisin; Protease-associated PA
High	Cersu1_117563	27	9	60	9	42.8	9.63758	8.1832	6.88293	11.4951	8.20356	9.03076	NO	Peptidase M24, catalytic core; Proliferation-associated protein 1; Calcium-binding EF-hand
High	Cersu1_79675	58	9	162	9	18.4	24.423	53.7236	126.949	230.626	83.0098	126.603	NO	Cupin, RmlC-type
High	Cersu1_82908	79	9	133	9	16.5	6.70936	6.96013	9.96542	31.007	26.5739	57.8221	NO	Nucleoside diphosphate kinase, core
High	Cersu1_114386	46	9	45	9	31.8	4.2149	3.36467	6.63848	5.08519	6.53299	6.14586	NO
High	Cersu1_117625	37	9	47	8	30.8	8.96779	19.3262	7.26049	22.1579	5.58415	19.9286	NO	Aldo/keto reductase
High	Cersu1_115642	51	9	81	9	27	12.117	12.092	9.10511	17.805	10.6297	15.4794	NO	Triosephosphate isomerase
High	Cersu1_113569	15	9	26	9	127.5	1.89284	4.46385	1.92148	9.70929	1.3923	1.00057	NO	Peptidase C19, ubiquitin carboxyl-terminal hydrolase 2; MATH; TRAF-like
High	Cersu1_110748	27	9	26	9	51.1	6.10225	5.85369	4.31329	5.02231	4.11051	4.67657	NO	Protein synthesis factor, GTP-binding; Translation elongation factor EFTu/EF1A, C-terminal; Translation elongation factor EFTu/EF1A, domain 2; Small GTP-binding protein; Translation elongation factor EFTu/EF1A, bacterial and organelle; Translation elongation and initiation factors/Ribosomal, beta-barrel; Translation elongation factor EF1A/initiation factor IF2gamma, C-terminal
High	Cersu1_116897	40	9	73	9	27.5	5.61285	8.16169	15.0222	18.684	37.5035	35.3022	NO	Short-chain dehydrogenase/reductase SDR; Glucose/ribitol dehydrogenase; NAD(P)-binding
High	Cersu1_116215	56	9	26	8	30.7	2.72719	2.95221	3.59312	8.81647	2.15132	2.5746	NO	Short-chain dehydrogenase/reductase SDR; Glucose/ribitol dehydrogenase; NAD(P)-binding
High	Cersu1_115950	51	9	57	9	36.7	6.09086	6.73947	9.03633	9.93431	16.7859	15.7238	NO	Alpha/beta hydrolase fold-3
High	Cersu1_116326	39	9	64	9	38.4	4.26498	5.19218	11.554	13.3358	41.5311	50.4494	YES	Glycoside hydrolase, family 10; Glycoside hydrolase, catalytic core
High	Cersu1_85710	52	9	30	9	22.6	1.44031	2.56293	7.90477	21.9287	1.76002	2.32556	NO	Dimeric alpha-beta barrel
High	Cersu1_115620	40	9	70	9	32.7	19.2565	16.2192	26.4072	34.3313	37.5898	31.941	NO	Aldo/keto reductase
High	Cersu1_113103	44	9	40	9	28.8	7.44739	6.3925	5.50376	9.38478	1.5963	2.14854	NO	Ribosomal protein L30, core; Ribosomal protein L30, N-terminal; Ribosomal protein L7, eukaryotic; Ribosomal protein L30, C-terminal
High	Cersu1_116672	17	9	21	9	68	4.78371	11.6516	2.02621	8.78846	1.67073	6.75866	YES	Beta-lactamase; Beta-lactamase-type transpeptidase fold
High	Cersu1_85714	48	9	96	9	33.3	3.32758	2.21619	11.2034	16.2609	29.1298	33.8326	NO	Peptidase S33, prolyl aminopeptidase; Alpha/beta hydrolase fold-1; Peptidase S33, tricorn interacting factor 1
High	Cersu1_71230	50	9	57	9	31.2	7.10476	10.0738	4.20295	7.17221	4.47496	6.17105	NO	20S proteasome, A and B subunits; Proteasome alpha-subunit, conserved site
High	Cersu1_82637	27	9	31	8	46.6	1.10156	2.72212	1.2792	3.92813	1.21539	3.79143	NO	AAA ATPase, core; AAA+ ATPase, core; 26S proteasome subunit P45; AAA ATPase, conserved site
High	Cersu1_110611	36	9	58	9	37.2	9.58562	11.942	4.07248	4.32918	3.47149	2.4626	NO	Acetohydroxy acid isomeroreductase, catalytic; 6-phosphogluconate dehydrogenase, C-terminal-like; NAD(P)-binding
High	Cersu1_80125	42	9	84	9	30	20.8731	22.7512	18.7195	27.6493	21.194	20.6339	NO	Short-chain dehydrogenase/reductase SDR; Glucose/ribitol dehydrogenase; NAD(P)-binding
High	Cersu1_114575	20	9	38	9	74.7	3.26474	2.41867	2.83193	2.49859	3.45594	2.51521	NO	UBA/THIF-type NAD/FAD binding fold; E1-like protein-activating enzyme Gsa7p/Apg7p; Molybdenum cofactor biosynthesis
High	Cersu1_116810	9	9	19	9	153.5	2.96492	2.16801	3.65645	4.64183	1.87126	3.27376	NO	WD40 repeat; Histone-fold; WD40 repeat-like
High	Cersu1_118778	16	9	27	9	97.7	1.65952	2.20325	2.05733	5.48385	1.64204	2.85439	NO	N-acetyl-gamma-glutamyl-phosphate reductase; Aspartate/glutamate/uridylate kinase; Semialdehyde dehydrogenase, NAD-binding; Semialdehyde dehydrogenase, dimerisation region; Protein of unknown function DUF619; NAGK-NAGSA, bifunctional; Acetylglutamate kinase; NAD(P)-binding
High	Cersu1_84922	35	9	42	9	33.6	3.03333	5.9245	2.32861	4.36857	1.71781	4.1275	NO	BAR
High	Cersu1_79582	20	9	33	9	58.3	5.62333	4.69105	5.05784	7.81273	4.84768	6.52925	NO	Armadillo; Importin-alpha-like, importin-beta-binding region; Armadillo-type fold
High	Cersu1_116064	41	8	27	8	25	8.92834	6.17921	8.38214	6.96664	6.92969	3.67983	NO	Ribosomal protein L10e; Ribosomal protein L10e/L16
High	Cersu1_84117	13	8	13	8	108.5	2.1429	1.90305	4.59245	1.92683	1.18925	0.320453	NO	Argonaute and Dicer protein, PAZ; Stem cell self-renewal protein Piwi; Region of unknown function DUF1785; Polynucleotidyl transferase, Ribonuclease H fold
High	Cersu1_111564	21	8	41	8	48.9	6.793	8.07235	4.00513	6.33713	4.383	5.08066	NO	NAD-dependent epimerase/dehydratase; NAD(P)-binding
High	Cersu1_118802	16	8	38	8	60.7	5.74784	3.0839	5.93171	5.89766	6.1437	6.69312	YES	Prenylcysteine lyase; FAD-dependent pyridine nucleotide-disulphide oxidoreductase
High	Cersu1_110384	16	8	41	8	61.7	5.51325	4.41145	5.47054	6.86814	5.00224	3.84862	NO	Aspartyl-tRNA synthetase, class IIb; Aminoacyl-tRNA synthetase, class II (D, K and N); Nucleic acid binding, OB-fold, tRNA/helicase-type; Aspartyl-tRNA synthetase, class IIb, archea/euk type; Aminoacyl-tRNA synthetase, class II; Nucleic acid-binding, OB-fold-like
High	Cersu1_111521	9	8	34	8	92.9	3.59231	5.25937	3.65905	6.78826	3.68215	6.72751	NO	Protease-associated PA; Transferrin receptor-like, dimerisation; Peptidase M28
High	Cersu1_114905	21	8	23	8	51.6	3.04439	5.58386	5.03886	7.94869	3.43885	4.11082	NO	Seryl-tRNA synthetase, class IIa; Aminoacyl-tRNA synthetase, class II (G, H, P and S); Seryl-tRNA synthetase, class IIa, N-terminal; Aminoacyl-tRNA synthetase, class II; tRNA-binding arm
High	Cersu1_114894	21	8	22	8	58.5	3.12749	3.43823	3.19525	3.19999	4.63591	3.37598	NO	Pyridoxal phosphate-dependent enzyme, beta subunit; Threonine synthase; Serine/threonine dehydratase, pyridoxal-phosphate-binding site
High	Cersu1_117639	31	8	37	8	48.2	3.92346	1.77655	2.94161	2.30456	3.88105	2.50329	NO	Actin/actin-like
High	Cersu1_116211	20	8	16	8	57.7	2.76791	0.773836	2.92625	1.38083	2.55867	0.837813	NO	Proteasome component region PCI; 26S proteasome regulatory subunit, C-terminal; PCI/PINT associated module
High	Cersu1_114450	16	8	40	8	71.4	5.28151	5.56167	7.03169	8.57533	9.22464	7.73535	NO	Uncharacterised conserved protein UCP014753
High	Cersu1_112063	39	8	57	8	33.4	7.31964	8.57664	8.74319	13.2329	5.78749	6.48156	NO	Aldo/keto reductase
High	Cersu1_91968	15	8	18	8	95.9	2.34121	2.75576	1.95968	3.37557	0.789717	0.639137	NO	Copper amine oxidase; Copper amine oxidase, C-terminal; Copper amine oxidase, N-terminal region
High	Cersu1_88019	63	8	131	8	18	41.1306	50.6928	78.7359	119.279	71.8231	82.5413	NO	Redoxin; Thioredoxin-like fold
High	Cersu1_113720	39	8	41	8	28.7	7.16377	9.49589	7.37482	14.6088	6.21036	8.86463	NO	Short-chain dehydrogenase/reductase SDR; Glucose/ribitol dehydrogenase; NAD(P)-binding
High	Cersu1_94231	14	8	49	8	74.7	6.6334	5.72621	8.41329	10.5644	16.1153	12.4589	YES	Beta-Ig-H3/fasciclin
High	Cersu1_145870	25	8	37	2	42.2	1.62694	1.87418	3.55091	7.06775	2.40988	4.98922	NO	Haem peroxidase, animal; Haem peroxidase
High	Cersu1_113641	35	8	41	8	29.4	9.57063	8.37662	8.42827	7.70513	9.45546	6.7741	NO	20S proteasome, A and B subunits; Proteasome alpha-subunit, conserved site
High	Cersu1_113354	26	8	17	8	56.1	0.904195	0.687246	1.66753	1.85278	2.4611	2.30219	NO	Aminotransferase, class I and II; Pyridoxal phosphate-dependent transferase, major region
High	Cersu1_111203	28	8	48	8	51.5	9.99977	7.15802	5.96667	5.34558	8.64214	5.77431	NO	Peptidase M18, aminopeptidase I
High	Cersu1_119381	33	8	54	8	29.1	10.3851	9.33793	9.27354	8.84848	10.1544	7.66323	NO	20S proteasome, A and B subunits; Proteasome alpha-subunit, conserved site
High	Cersu1_123187	22	8	22	8	59.7	3.28298	5.60197	1.16448	2.19717	4.54486	4.97612	NO	Pyridoxal phosphate-dependent decarboxylase; Glutamate decarboxylase; Pyridoxal phosphate-dependent transferase, major region
High	Cersu1_112595	8	8	13	8	191.6	2.18158		2.8976		3.10395		NO	Clathrin, heavy chain/VPS, 7-fold repeat; Clathrin, heavy chain, propeller, N-terminal; Clathrin, heavy chain, linker, core motif; Clathrin, heavy chain; Actinin-type, actin-binding, conserved site; Armadillo-type fold
High	Cersu1_110386	39	8	46	8	26.5	6.27219	6.73973	8.16762	13.4285	12.9007	8.67916	NO	Alpha/beta hydrolase; Alpha/beta hydrolase fold-1
High	Cersu1_151483	51	8	62	8	17.7	2.57687	4.0073	5.63344	8.91777	13.1222	16.0811	NO	Glyoxalase/extradiol ring-cleavage dioxygenase; Glyoxalase/bleomycin resistance protein/dioxygenase; Glyoxalase I
High	Cersu1_151449	23	8	21	6	51.8	3.29785	1.98462	1.53582	2.09012	0.312235	0.755888	NO	Aldehyde dehydrogenase; Hydroxymethylglutaryl-CoA reductase, class I/II, catalytic; Aldehyde dehydrogenase, conserved site; Aldehyde/histidinol dehydrogenase
High	Cersu1_113867	19	8	16	8	68	0.713489	1.06795	1.24634	3.23037	1.46856	2.174	NO	ATPase, F1/V1/A1 complex, alpha/beta subunit, nucleotide-binding; ATPase, F1/V1/A1 complex, alpha/beta subunit, C-terminal; ATPase, F1/V1/A1 complex, alpha/beta subunit, N-terminal; ATPase, V1 complex, subunit A
High	Cersu1_116873	25	8	19	8	40.5	1.87534	4.10704	2.0949	3.14977	1.17273	2.55463	NO	FAD dependent oxidoreductase
High	Cersu1_117378	49	8	30	8	23.1	3.47772	5.71042	2.25364	3.84011	3.2358	4.47531	NO	NUDIX hydrolase, core; NUDIX
High	Cersu1_114329	33	8	63	8	41.4	3.46233	3.13021	4.67056	6.6188	8.07855	8.76541	NO	Autophagocytosis associated protein, N-terminal; Autophagocytosis associated protein, C-terminal; Calcium-binding EF-hand
High	Cersu1_113607	23	8	30	8	51.7	3.28102	0.973238	2.74432	1.33448	3.93486	1.87812	NO	Delta crystallin; Fumarate lyase; Argininosuccinate lyase; L-Aspartase-like
High	Cersu1_111315	58	8	56	8	19.1	4.79529	8.13491	4.79035	9.89297	5.32788	17.0074	NO	Translationally controlled tumour-associated TCTP; Mss4-like
High	Cersu1_111253	49	8	57	8	22.4	27.7418	12.062	8.28545	7.83766	7.33052	6.75325	NO	Ribosomal protein S7e
High	Cersu1_124360	19	8	73	7	57.2	7.67369	12.5517	7.21932	12.6352	6.52877	11.9048	YES	Peptidase S10, serine carboxypeptidase
High	Cersu1_157524	41	8	96	8	32.2	9.50166	13.2534	11.2275	18.1442	4.89467	7.61043	NO	Aldo/keto reductase
High	Cersu1_49863	38	8	81	5	39.5	122.57	143.969	14.7044	65.424	7.47616	17.0582	YES	Haem peroxidase, plant/fungal/bacterial; Fungal lignin peroxidase; Haem peroxidase
High	Cersu1_66716	47	8	36	8	27.7	4.23206	2.57577	6.3184	7.82905	12.5424	7.04528	NO	Short-chain dehydrogenase/reductase SDR; Glucose/ribitol dehydrogenase; NAD(P)-binding
High	Cersu1_117492	31	8	98	8	37.8	11.7362	13.1682	8.97388	15.4356	9.46758	12.3607	NO	NmrA-like; NAD(P)-binding
High	Cersu1_119783	21	8	42	8	55.5	4.75006	3.42775	2.33942	2.75405	3.40641	2.3273	NO	Fumarate reductase/succinate dehydrogenase flavoprotein, N-terminal
High	Cersu1_113623	34	8	55	8	34	12.1709	13.5056	10.2076	14.5419	11.9095	10.9845	NO	Peptidase T1A, proteasome beta-subunit; 20S proteasome, A and B subunits; Proteasome, beta-type subunit, conserved site
High	Cersu1_114972	34	8	46	8	36.3	4.3043	5.99704	6.35017	8.60736	8.8702	13.0649	NO	NAD-dependent epimerase/dehydratase; NAD(P)-binding
High	Cersu1_78882	21	8	31	8	51.8	3.66159	3.61284	1.41738	3.32199	2.18131	3.06694	NO	Peptidase M17, leucyl aminopeptidase, C-terminal; Peptidase M17, leucyl aminopeptidase, N-terminal
High	Cersu1_114110	38	8	47	8	38.4	5.89369	5.40855	6.54045	9.309	4.60983	6.00703	NO	Intradiol ring-cleavage dioxygenase, C-terminal; Catechol dioxygenase, N-terminal; Intradiol ring-cleavage dioxygenase, core
High	Cersu1_80075	25	8	20	8	52	0.369858	1.98249	1.33766	3.40715	2.93975	6.84309	NO	Aldehyde dehydrogenase; Succinic semialdehyde dehydrogenase; Aldehyde dehydrogenase, conserved site; Aldehyde/histidinol dehydrogenase
High	Cersu1_157551	30	8	36	8	58.2	4.16174	3.31117	4.27014	4.72362	7.02384	5.27429	NO	Carboxylesterase, type B
High	Cersu1_102344	14	8	21	8	82.5	2.11275	2.21022	1.45944	2.36447	2.21969	2.15527	NO	AIR synthase related protein; Phosphoribosylglycinamide synthetase; AIR synthase related protein, C-terminal; Phosphoribosylformylglycinamidine cyclo-ligase; ATP-grasp fold; Rudiment single hybrid motif; PreATP-grasp-like fold; PurM, N-terminal-like
High	Cersu1_80840	46	8	68	7	25.2	11.7971	10.7618	8.3645	9.85608	4.58896	3.50943	NO	Glucose/ribitol dehydrogenase; Short-chain dehydrogenase/reductase SDR; NAD(P)-binding
High	Cersu1_119652	32	8	40	8	34.8	5.03358	5.78223	5.44335	3.38203	5.68522	2.74672	NO	WD40 repeat; WD40 repeat-like
High	Cersu1_88410	35	8	46	8	33.6	9.73369	8.73878	4.48618	6.86808	4.11689	3.71373	NO	Short-chain dehydrogenase/reductase SDR; Glucose/ribitol dehydrogenase; NAD(P)-binding
High	Cersu1_110014	22	8	50	8	49.6	6.70001	7.44671	3.9751	5.77302	3.64498	4.45705	NO	Thiolase; Thiolase-like
High	Cersu1_112346	13	8	32	8	88.3	2.45504	2.24276	2.67345	3.04303	2.94432	2.1745	NO	Cullin, N-terminal region; Cullin homology; Cullin, conserved site; Cullin repeat-like
High	Cersu1_110594	15	7	24	7	67.1	3.18803	3.25031	1.8764	2.93005	1.81585	2.46346	NO	HEAT; Armadillo-type fold
High	Cersu1_89135	25	7	12	7	48.8	0.149687	1.38609		2.9215	0.0570212	5.04379	NO	Protein of unknown function DUF1479
High	Cersu1_85667	48	7	80	7	23.4	11.3466	25.1744	9.32383	23.1655	6.89472	16.9473	NO	Translation elongation factor EF1B, beta and delta chains, guanine nucleotide exchange; Inorganic pyrophosphatase; Translation elongation factor EF1B, beta/delta chains, conserved site; Glutathione S-transferase, C-terminal-like
High	Cersu1_83936	26	7	35	7	44.8	2.96914	3.73647	3.85567	7.0028	6.45895	9.42633	NO	Protein kinase, core; Serine/threonine protein kinase-related; Tyrosine protein kinase; Serine/threonine protein kinase; Protein kinase ATP binding, conserved site; Serine/threonine protein kinase, active site; Protein kinase-like
High	Cersu1_105539	27	7	272	6	39.8	249.233	277.275	190.802	292.484	847.349	1588.83	YES	Haem peroxidase, plant/fungal/bacterial; Fungal lignin peroxidase; Haem peroxidase
High	Cersu1_113919	9	7	33	7	125.1	4.16058	4.41214	3.71419	5.74143	2.94953	2.58108	NO	Isoleucyl-tRNA synthetase, class Ia, N-terminal; Aminoacyl-tRNA synthetase, class Ia; Valyl/Leucyl/Isoleucyl-tRNA synthetase, class I, anticodon-binding; Isoleucyl-tRNA synthetase, class Ia; Aminoacyl-tRNA synthetase, class I, conserved site; Aminoacyl-tRNA synthetase, class 1a, anticodon-binding; Valyl/Leucyl/Isoleucyl-tRNA synthetase, class Ia, editing
High	Cersu1_112448	9	7	19	7	119.1	0.890361	2.01352	1.34383	2.59158	1.4893	2.2169	NO	HEAT; Importin-beta, N-terminal; Armadillo-type fold
High	Cersu1_115637	32	7	36	7	45.4	2.05597	6.49532	1.84716	6.31705	3.17687	5.78123	NO	Mannose-6-phosphate isomerase, type I; Mannose-6-phosphate isomerase; Cupin, RmlC-type
High	Cersu1_90469	38	7	28	7	27.3	1.2998	2.92063	3.13929	6.7478	10.0731	13.773	NO	Dimeric alpha-beta barrel
High	Cersu1_89195	18	7	11	7	58.3	0.532178	1.64034	1.49145	3.7128	0.690511	1.58895	NO	Glycosyl transferase, family 20; Alpha,alpha-trehalose-phosphate synthase
High	Cersu1_119412	31	7	55	7	27.5	15.5303	13.8194	9.34239	11.6548	7.18676	7.19588	NO	Ribosomal protein L2; Translation protein SH3-like; Nucleic acid-binding, OB-fold-like
High	Cersu1_133008	22	7	18	7	37.3	0.455789		2.54019	1.81802	7.11482	3.78407	NO	Alcohol dehydrogenase, zinc-binding; Alcohol dehydrogenase GroES-like; GroES-like; NAD(P)-binding
High	Cersu1_110910	18	7	16	7	60.1	0.407189	0.318137	0.983065	3.37295	0.09859	0.517681	NO	Isocitrate lyase and phosphorylmutase, core; Isocitrate lyase and phosphorylmutase; Isocitrate lyase; Pyruvate/Phosphoenolpyruvate kinase, catalytic core
High	Cersu1_162360	17	7	87	7	76.1	33.2214	34.017	11.9402	18.0582	8.11345	10.3149	YES	Alpha-L-arabinofuranosidase, C-terminal; Glycoside hydrolase, catalytic core
High	Cersu1_110250	21	7	30	7	47.8	5.76428	5.60845	4.45957	6.44885	4.24763	4.84853	NO	RNA recognition motif, RNP-1; RNA recognition, region 1
High	Cersu1_115728	16	7	41	4	55.8	3.40242	3.46174	2.58912	2.73183	3.57701	2.70628	NO	Glycoside hydrolase, family 5; Glycoside hydrolase, catalytic core
High	Cersu1_104803	30	7	19	7	43.5	1.78359	2.28656	1.84329	3.29392	1.70032	2.61669	NO	WD40 repeat; WD40 repeat-like
High	Cersu1_111166	28	7	37	7	31.1	8.57958	7.53311	8.62513	6.3847	8.3335	5.06287	NO
High	Cersu1_89245	15	7	29	7	53.7	2.45527	2.91264	2.6049	8.20259	2.6546	2.68036	NO	Pyridine nucleotide-disulphide oxidoreductase, NAD-binding region; FAD-dependent pyridine nucleotide-disulphide oxidoreductase; Pyridine nucleotide-disulphide oxidoreductase, class I; Mercuric reductase; Pyridine nucleotide-disulphide oxidoreductase, dimerisation; Dihydrolipoamide dehydrogenase; Pyridine nucleotide-disulphide oxidoreductase, class I, active site; FAD/NAD-linked reductase, dimeris…
High	Cersu1_103818	16	7	185	7	69	39.8015	37.4612	69.7804	145.519	186.48	261.403	YES	Peptidase S53, propeptide; Peptidase S8 and S53, subtilisin, kexin, sedolisin; Proteinase inhibitor, propeptide
High	Cersu1_114733	23	7	35	7	40.4	2.93204	8.31157	2.35522	15.5287	2.22214	6.85342	NO	Peptidyl-prolyl cis-trans isomerase, cyclophilin-type; Tetratricopeptide TPR-1; Tetratricopeptide region; Cyclophilin-like
High	Cersu1_109509	24	7	44	7	28.3	2.72761	6.63533	5.87791	8.54828	8.01395	7.76959	NO	Protein of unknown function DUF427
High	Cersu1_118211	24	7	25	7	43.5	5.34339	3.27097	2.71542	2.22088	2.27267	1.26438	NO	Aminoglycoside phosphotransferase; Serine/threonine protein kinase, active site; Protein kinase-like
High	Cersu1_89287	39	7	27	7	27.5	12.215	16.7246	13.8253	21.8748	19.2786	19.262	NO	Glucose/ribitol dehydrogenase; Short-chain dehydrogenase/reductase SDR; WD40 repeat; NAD(P)-binding
High	Cersu1_116563	19	7	23	7	59.9	2.3506	2.64462	2.58822	4.41218	3.29562	3.25517	NO	Glycoside hydrolase, family 3, N-terminal; Glycoside hydrolase, catalytic core
High	Cersu1_117005	20	7	25	7	37.7	2.22718	3.52123	3.31931	4.79433	2.27977	4.11042	NO	GroES-related; Alcohol dehydrogenase, zinc-binding; Alcohol dehydrogenase GroES-like; Alcohol dehydrogenase, zinc-containing, conserved site; GroES-like; NAD(P)-binding
High	Cersu1_111228	32	7	44	7	26	9.10742	9.32067	7.90501	8.28259	9.80714	9.51392	NO	Peptidase T1A, proteasome beta-subunit; 20S proteasome, A and B subunits; Proteasome, beta-type subunit, conserved site
High	Cersu1_82407	19	7	48	7	44.1	6.33474	5.77925	5.89334	7.49834	3.60657	6.46566	NO	Dehydrogenase, E1 component; Pyruvate dehydrogenase (acetyl-transferring) E1 component, alpha subunit, subgroup y
High	Cersu1_118502	18	7	29	7	59.5	3.9154	5.40587	3.98593	9.567	1.78652	3.20173	YES	Carboxylesterase, type B
High	Cersu1_85335	31	7	14	7	26.9	6.15086	0.676477	1.46253	2.28226	4.3281	5.16014	NO	TENA/THI-4 protein/Coenzyme PQQ biosynthesis protein C; Haem oxygenase-like, multi-helical
High	Cersu1_112899	36	7	23	7	37.2	6.42992	5.05391	3.784	5.05476	2.15136	2.48294	NO	Helix-turn-helix, Fis-type; 2-nitropropane dioxygenase, NPD
High	Cersu1_110176	29	7	27	7	35.3	3.37295	3.85037	9.73402	15.0074	12.1514	10.5321	NO	Dihydroorotate dehydrogenase, core
High	Cersu1_84361	52	7	47	7	23.1	7.10437	7.74476	4.74159	8.33852	6.03883	6.79159	NO	20S proteasome, A and B subunits; Proteasome, beta-type subunit, conserved site
High	Cersu1_110123	28	7	43	7	43.3	4.03116	4.7622	4.68543	5.82085	5.05107	5.75532	NO	Taurine catabolism dioxygenase TauD/TfdA
High	Cersu1_84251	24	7	23	7	58.5	3.03264	3.35479	2.24912	4.84345	2.38478	3.88526	NO	Molybdenum cofactor biosynthesis
High	Cersu1_112941	43	7	102	7	18.1	32.6706	40.1569	19.3883	41.9038	14.2039	28.5234	NO	Ubiquitin; Ribosomal protein S27a
High	Cersu1_79689	48	7	101	7	31.8	14.0619	13.2443	20.4019	36.588	35.6862	35.4548	NO	Isochorismatase hydrolase
High	Cersu1_87608	31	7	29	7	30.8	7.04369	6.02223	6.55673	7.92946	8.46115	6.72474	NO	FMN-binding split barrel, related
High	Cersu1_53412	30	7	31	7	38.4	13.1996	12.0753	1.43287	2.73914	1.39644	2.78736	YES	Glycoside hydrolase, family 10; Glycoside hydrolase, catalytic core
High	Cersu1_114974	23	7	70	7	42.8	6.04589	6.81695	5.52575	7.039	7.56194	7.2967	NO	NAD-dependent epimerase/dehydratase; GDP-mannose 4,6-dehydratase; Short-chain dehydrogenase/reductase SDR; NAD(P)-binding
High	Cersu1_113638	20	7	25	7	47.1	6.07716	2.19725	4.64443	4.22296	4.05461	2.50948	NO	NAD(P)-binding
High	Cersu1_63592	40	7	22	7	32.9	4.03305	2.91865	8.07481	6.04893	4.45207	3.39079	NO
High	Cersu1_114344	26	7	33	7	38	30.0604	5.41556	15.061	4.84506	16.6231	3.28901	NO	Pyridoxal phosphate-dependent enzyme, beta subunit; Cysteine synthase/cystathionine beta-synthase P-phosphate-binding site
High	Cersu1_118846	19	7	30	7	68.6	4.10181	3.22219	3.71394	2.58761	3.5482	2.54078	NO	Arginyl-tRNA synthetase, class Ic, core; DALR anticodon binding; Arginyl-tRNA synthetase, class Ic; Aminoacyl-tRNA synthetase, class I, conserved site; Aminoacyl-tRNA synthetase, class 1a, anticodon-binding; Arginyl tRNA synthetase, class Ic, N-terminal
High	Cersu1_119784	37	7	64	7	31.5	7.7298	8.65942	9.89339	17.0814	12.907	14.3242	NO	Short-chain dehydrogenase/reductase SDR; Glucose/ribitol dehydrogenase; NAD(P)-binding
High	Cersu1_100519	37	7	89	7	33.7	42.3681	33.0405	26.092	31.0483	18.7823	18.3791	NO	Ribosomal protein 60S; Ribosomal protein L10
High	Cersu1_79435	17	7	56	7	87.8	10.7047	7.67634	7.0721	7.41155	0.431887	1.2758	YES	Cellulose-binding region, fungal; BNR repeat
High	Cersu1_118094	23	7	30	7	45.5	2.32343	2.93323	2.48027	3.88018	3.17585	4.65527	NO	Oxidative stress survival, Svf1-like
High	Cersu1_111492	29	7	22	7	42.5	4.85902	0.503243	2.9332	0.999141	2.9479	0.781175	NO	Amidohydrolase 2
High	Cersu1_82833	30	7	78	7	24.2	12.8507	12.7288	18.3836	22.0446	25.4158	22.1059	NO	Ras GTPase; Ran GTPase; Ras; Ras small GTPase, Ras type; Ras small GTPase, Rho type; Ras small GTPase, Rab type; Small GTP-binding protein
High	Cersu1_152302	28	7	32	7	50.9	5.49347	4.40297	2.23806	2.62733	1.75793	0.946925	NO	O-methyltransferase, family 2; Orn/DAP/Arg decarboxylase 2
High	Cersu1_118808	27	7	20	7	35.5	1.13381	1.11892	3.52902	4.79558	4.95839	5.05404	NO	Glucose/ribitol dehydrogenase; Short-chain dehydrogenase/reductase SDR; NAD(P)-binding
High	Cersu1_117435	17	7	30	7	59.8	2.74152	2.97242	2.6376	3.90849	3.97265	3.2588	NO	Glutamine amidotransferase superfamily; Glutamine amidotransferase class-I, C-terminal; GMP synthase, C-terminal; tRNA (5-methylaminomethyl-2-thiouridylate)-methyltransferase; GMP synthase, N-terminal; Glutamine amidotransferase, class I, active site
High	Cersu1_111462	29	7	49	7	34	4.15202	7.87842	8.65474	14.5791	24.0823	26.2578	NO	Aldo/keto reductase
High	Cersu1_151111	34	7	33	7	37	0.506271	1.40081	2.39755	5.45059	3.56515	5.31269	NO	Alcohol dehydrogenase, zinc-binding; Alcohol dehydrogenase GroES-like; GroES-like; NAD(P)-binding
High	Cersu1_117158	13	7	23	7	82.5	3.85832	3.2719	2.03194	2.2747	1.8839	1.37864	NO	Copper amine oxidase, C-terminal; Copper amine oxidase, N2-terminal; Copper amine oxidase, N3-terminal; Copper amine oxidase; Copper amine oxidase, N-terminal region
High	Cersu1_67561	26	7	66	5	42.5	22.8101	16.7612	5.12656	5.06005	1.01767	0.658618	YES	Cellulose-binding region, fungal; Glycoside hydrolase, family 10; Glycoside hydrolase, catalytic core
High	Cersu1_85378	43	7	11	7	15.3	1.85629	0.774413	2.03188	2.24622	1.59295	2.12322	NO	Histone H2B; Histone core; Histone-fold
High	Cersu1_113523	26	7	55	7	44.3	6.22777	8.50574	4.24534	8.16558	5.08911	5.42217	NO	Phosphoserine aminotransferase; Aminotransferase, class V/Cysteine desulphurase; Pyridoxal phosphate-dependent transferase, major region
High	Cersu1_83873	23	7	36	7	38.5	9.86391	11.4756	3.92094	6.40073	6.33681	7.25891	NO	GroES-related; Alcohol dehydrogenase, zinc-binding; Alcohol dehydrogenase GroES-like; Alcohol dehydrogenase, zinc-containing, conserved site; GroES-like; NAD(P)-binding
High	Cersu1_114091	40	7	43	7	18	14.3773	12.2252	9.913	16.133	7.10399	10.5881	NO	Ribosomal protein S13; Ribosomal protein S13-like, H2TH
High	Cersu1_118652	24	7	92	7	65.2	6.01312	10.0327	19.2855	33.8016	25.509	54.5698	YES	Peptidase S53, propeptide; Peptidase S8 and S53, subtilisin, kexin, sedolisin; Proteinase inhibitor, propeptide
High	Cersu1_114839	25	7	106	1	41.5				2.08709		1.75736	NO	Actin/actin-like; Actin, conserved site
High	Cersu1_112428	8	7	20	7	116.9	1.91728	7.44224	1.37598	7.8022	1.89092	6.26162	NO	Importin-beta, N-terminal; Armadillo-type fold
High	Cersu1_117234	32	7	28	7	28.7	2.35594	2.49546	4.68927	4.17727	3.91505	5.26321	NO	Adenylate/cytidine kinase, N-terminal; Adenylate kinase; Adenylate kinase, zinc-finger lid region; Adenylate kinase, subfamily
High	Cersu1_43078	34	6	23	6	17.1	11.8151	18.7827	5.34678	11.9786	4.34729	5.33433	NO	Ribosomal protein S17; Nucleic acid-binding, OB-fold-like
High	Cersu1_114291	12	6	27	6	91.2	1.27933	4.62222	2.24758	7.32871	2.41844	4.29578	YES	Glycosyl hydrolase 92; Alpha-1,2-mannosidase, putative
High	Cersu1_85545	25	6	28	6	38.9	2.15661	7.07718	3.07788	7.74067	3.6977	14.1323	YES	Glycoside hydrolase, family 10; Glycoside hydrolase, catalytic core
High	Cersu1_61952	34	6	69	6	23.7	7.24076	9.16331	7.98745	12.119	7.99986	13.6062	NO	Ribulose-phosphate 3-epimerase; Ribulose-phosphate binding barrel
High	Cersu1_67221	46	6	81	5	17.6	8.0838	2.62174	13.9678	16.0012	35.3489	57.2481	NO	Peptidyl-prolyl cis-trans isomerase, cyclophilin-type; Cyclophilin-like
High	Cersu1_118322	22	6	133	4	43.9	22.2539	26.4034	15.5514	20.8789	32.7089	44.8259	NO
High	Cersu1_117596	9	6	16	6	99.1	1.3292	1.81489	1.94141	4.9557	1.15645	3.93873	NO	Mevalonate and galactokinase; GHMP kinase; Cys/Met metabolism, pyridoxal phosphate-dependent enzyme; GHMP kinase, C-terminal; Mevalonate kinase; Cystathionine beta-lyase, eukaryotic; GHMP kinase, ATP-binding, conserved site; Pyridoxal phosphate-dependent transferase, major region
High	Cersu1_120279	32	6	12	6	36.8	0.276205	0.617054	0.722376	3.16498	1.02693	3.84815	NO	Flavoprotein pyridine nucleotide cytochrome reductase; NADH:cytochrome b5 reductase (CBR); Oxidoreductase FAD/NAD(P)-binding; Oxidoreductase FAD-binding region
High	Cersu1_110270	39	6	24	6	28.5	4.33451	3.48242	3.29895	4.88406	3.32096	8.41328	NO	Glucosamine/galactosamine-6-phosphate isomerase; 6-phosphogluconolactonase
High	Cersu1_115669	12	6	18	6	84.2	1.59174	3.1753	1.94759	4.2148	2.53521	4.12411	NO	Hydantoinase/oxoprolinase; Hydantoinaseoxoprolinase, N-terminal
High	Cersu1_115979	12	6	29	6	108.1	1.09898	2.96123	2.54725	4.50758	2.99139	4.32542	YES	Carbohydrate-binding WSC; Glyoxal oxidase, N-terminal; Region of unknown function DUF1929; Carbohydrate-binding WSC, subgroup; Galactose oxidase/kelch, beta-propeller; Immunoglobulin E-set
High	Cersu1_161311	14	6	31	6	74	3.43746	4.92631	4.19247	5.3662	9.18376	9.85092	YES	Metallophosphoesterase; Sphingomyelin phosphodiesterase
High	Cersu1_110935	27	6	23	6	39.9	8.14828	8.31891	5.7252	6.36947	6.38413	5.54494	NO	Semialdehyde dehydrogenase, NAD-binding; Semialdehyde dehydrogenase, dimerisation region; Aspartate-semialdehyde dehydrogenase; Aspartate-semialdehyde dehydrogenase, peptidoglycan lacking; Aspartate-semialdehyde dehydrogenase, conserved site; NAD(P)-binding
High	Cersu1_115447	18	6	89	6	41.4	24.3252	29.0258	31.7813	45.9936	17.9562	32.8695	NO
High	Cersu1_118153	18	6	17	6	39.7	7.79016	7.25904	3.24639	3.99011	2.31051	1.78127	NO	ATPase, BadF/BadG/BcrA/BcrD type
High	Cersu1_112261	25	6	35	6	46.4	3.74007	2.81359	4.56702	6.00639	5.95172	6.70724	NO	Peptidase A1; Peptidase aspartic, catalytic
High	Cersu1_111871	36	6	32	6	17.3	12.716	11.8902	6.54382	8.22065	7.66451	6.74221	NO	Ribosomal protein S19e
High	Cersu1_113035	21	6	27	6	56.4	2.9026	2.55908	2.25963	4.09944	2.01141	3.00523	NO	WD40 repeat; Region of unknown function DUF1899; Region of unknown function DUF1900; WD40 repeat-like
High	Cersu1_120062	22	6	33	5	51.2	0.415898	1.67598	2.05421	5.61762	3.30975	5.7412	NO	Aromatic-ring hydroxylase; FAD dependent oxidoreductase
High	Cersu1_113781	7	6	11	6	122.3	1.64883	0.987162	1.78245	1.37975	3.05356	1.66019	NO	Importin-beta, N-terminal; Exportin-1/Importin-beta-like; Exportin 1, C-terminal; Armadillo-type fold
High	Cersu1_90791	17	6	24	5	54.7	0.806253	2.10657	2.14425	3.25232	7.90424	10.7622	YES	Carboxylesterase, type B
High	Cersu1_87564	33	6	30	6	32.8	7.15645	11.2987	2.25739	6.98089	2.53749	6.56436	NO
High	Cersu1_48049	25	6	11	6	32.7	1.5622	2.08714	1.71564	2.09931	1.59149	2.43347	NO	Vitamin B6 biosynthesis protein; Ribulose-phosphate binding barrel
High	Cersu1_94398	36	6	62	4	39.3	24.5281	27.0825	0.522647	6.7286	0.385903	0.853116	YES	Haem peroxidase, plant/fungal/bacterial; Fungal lignin peroxidase; Haem peroxidase
High	Cersu1_114372	21	6	13	6	37.6	0.0966185	0.390108	1.43536	1.85308	2.68938	5.64252	NO
High	Cersu1_117565	9	6	10	6	89.2	0.911581	1.68551	3.58588	2.03587	2.46643	1.87853	NO	Phosphofructokinase-core; Phosphofructokinase; 6-phosphofructokinase, eukaryotic type; Phosphofructokinase, conserved site
High	Cersu1_120085	31	6	26	6	26.9	3.4184	5.79034	2.3638	4.86487	2.5208	4.03898	NO	20S proteasome, A and B subunits; Proteasome alpha-subunit, conserved site
High	Cersu1_152859	39	6	17	6	22.3	1.57411	2.4372	1.88946	3.34589	1.17886	1.10789	NO	Short-chain dehydrogenase/reductase SDR; Glucose/ribitol dehydrogenase; NAD(P)-binding
High	Cersu1_120940	19	6	26	6	50.6	2.91112	2.2228	2.01772	2.83384	2.16164	2.40902	NO	D-isomer specific 2-hydroxyacid dehydrogenase, catalytic region; D-isomer specific 2-hydroxyacid dehydrogenase, NAD-binding; NAD(P)-binding
High	Cersu1_107901	22	6	72	6	35	17.5544	14.6048	7.66071	8.9408	13.1241	17.3419	YES	Lipase, GDSL; Esterase, SGNH hydrolase-type
High	Cersu1_116630	36	6	30	6	24.7	3.04697	4.8325	1.45672	2.98616	1.67885	3.4096	NO	Methionine sulphoxide reductase A
High	Cersu1_110399	19	6	29	6	43.5	4.01785	6.31333	2.26579	4.64155	2.69968	3.98899	NO	Thiolase; Thiolase-like
High	Cersu1_110066	6	6	14	6	134	1.31924	0.991815	1.45489	2.17899	1.67982	1.68862	NO	HEAT; TATA-binding protein interacting (TIP20); Armadillo-type fold
High	Cersu1_129670	19	6	24	6	48	6.16777	0.560969	2.59554	1.04099	2.13985	0.733816	NO	Catalytic domain of components of various dehydrogenase complexes; Biotin/lipoyl attachment; E3 binding; Dihydrolipoamide acetyltransferase, long form; 2-oxo acid dehydrogenase, lipoyl-binding site; Single hybrid motif
High	Cersu1_114303	28	6	31	6	28.4	5.95279	5.07588	3.45561	5.04993	3.90433	2.87946	NO	20S proteasome, A and B subunits; Proteasome alpha-subunit, conserved site
High	Cersu1_90787	24	6	33	6	41.2	1.09162	1.32533	2.39667	3.12041	5.14982	5.24887	NO	Kelch repeat type 1; Galactose oxidase/kelch, beta-propeller
High	Cersu1_112730	15	6	34	6	67.7	0.672756	0.760932	2.51492	5.03689	6.25342	11.3634	YES	Peptidase S53, propeptide; Peptidase S8 and S53, subtilisin, kexin, sedolisin; Proteinase inhibitor, propeptide
High	Cersu1_83116	44	6	43	6	24.3	4.00589	5.3785	7.68883	8.59986	5.61881	9.36729	YES	Peptidyl-prolyl cis-trans isomerase, cyclophilin-type; Cyclophilin-like
High	Cersu1_111031	20	6	21	6	47	2.82704	1.97811	1.76977	2.17735	1.10986	1.36263	NO	Proteasome component region PCI; Colicin immunity protein/pyocin immunity protein
High	Cersu1_115269	30	6	20	6	24.7	40.4626	3.91195	9.35717	4.60022	4.02867	5.77407	NO	Manganese and iron superoxide dismutase
High	Cersu1_130534	24	6	26	6	36.7	2.38682	3.72117	4.12595	5.57429	2.31321	2.08148	NO	RNA recognition motif, RNP-1
High	Cersu1_116529	8	6	16	6	123.1	1.88767	1.60597	1.53725	2.46548	1.15615	1.69005	NO	Valyl/Leucyl/Isoleucyl-tRNA synthetase, class I, anticodon-binding; Aminoacyl-tRNA synthetase, class I (M); Leucyl-tRNA synthetase, class Ia, archaeal/eukaryotic cytosolic; Aminoacyl-tRNA synthetase, class I, conserved site; Aminoacyl-tRNA synthetase, class 1a, anticodon-binding; Valyl/Leucyl/Isoleucyl-tRNA synthetase, class Ia, editing
High	Cersu1_93058	14	6	17	6	65.7	1.49647	4.0201	2.1968	6.1393	2.3964	4.80305	NO	Peptidase M20; Peptidase M20, dimerisation; Peptidase M20, carboxypeptidase S
High	Cersu1_83946	27	6	9	6	33.6	2.27656	1.16721	2.34084	1.54411	1.84805	0.8094	NO	Purine phosphorylase, family 2; Inosine guanosine and xanthosine phosphorylase
High	Cersu1_85515	11	6	13	6	77.1	0.713005	1.72475	0.705905	2.52248	1.78089	3.45448	NO	Glutamine amidotransferase, class-II; Sugar isomerase (SIS); Glucosamine-fructose-6-phosphate aminotransferase, isomerising
High	Cersu1_87037	9	6	8	6	87.4	1.55534	0.16966	0.851046		0.957018	0.0947181	NO	Cysteinyl-tRNA synthetase, class Ia, N-terminal; Cysteinyl-tRNA synthetase, class Ia; Aminoacyl-tRNA synthetase, class 1a, anticodon-binding
High	Cersu1_86951	15	6	38	6	59.5	2.56994	4.38915	8.0874	20.4941	8.46284	13.2174	YES	Carboxylesterase, type B; S-layer homology region
High	Cersu1_86771	43	6	55	6	26.2	6.00814	6.27331	5.91113	9.33282	11.0483	10.5632	NO	Translation initiation factor IF6; Regulator of chromosome condensation, RCC1
High	Cersu1_117754	12	6	9	6	59.4	1.33194	1.81877	2.61491	6.75607	1.68263	2.04008	YES	FAD-dependent pyridine nucleotide-disulphide oxidoreductase; Aromatic-ring hydroxylase; Monooxygenase, FAD-binding; Thioredoxin-like fold
High	Cersu1_82107	16	6	24	6	51.7	2.80879	3.07911	2.44884	3.98266	2.87213	3.2388	NO	FAD dependent oxidoreductase
High	Cersu1_116093	23	6	35	6	33.9	0.253953	0.84477	3.15258	5.31936	11.1555	15.1061	NO	Glucose/ribitol dehydrogenase; Short-chain dehydrogenase/reductase SDR; NAD(P)-binding
High	Cersu1_86929	42	6	51	6	17.6	31.2087	28.2124	19.8416	15.6729	13.1841	14.8698	NO	Ribosomal protein L11
High	Cersu1_116165	28	6	32	6	39.3	3.4756	2.9495	3.15084	3.37234	4.87169	3.50594	NO	Homoserine dehydrogenase, catalytic; Aspartate/homoserine dehydrogenase, NAD-binding; NAD(P)-binding
High	Cersu1_141794	21	6	15	6	41	0.206638	2.46096	1.6627	7.63014	0.138974	3.38144	NO	NADH:flavin oxidoreductase/NADH oxidase, N-terminal
High	Cersu1_147790	18	6	80	6	48.7	21.9933	23.4449	14.0435	15.5398	13.8057	13.9692	YES	Glycoside hydrolase, family 5; Thymidylate kinase; Glycoside hydrolase, catalytic core
High	Cersu1_85281	23	6	73	6	47.3	19.2245	25.3321	10.1124	15.0207	13.843	18.921	YES	Glycoside hydrolase, clan GH-D; Glycoside hydrolase, family 27; Glycoside hydrolase, catalytic core
High	Cersu1_111366	44	6	46	6	21.3	18.8234	19.5785	11.2481	16.3056	8.58462	12.0888	NO	Ribosomal protein L6
High	Cersu1_111131	16	6	23	6	69.3	3.75903	3.11078	2.34501	3.31465	2.81241	2.48299	NO	Molybdopterin binding; MoeA, N-terminal, domain I and II; MoeA, C-terminal, domain IV; Molybdenum cofactor biosynthesis, conserved site
High	Cersu1_88707	11	6	17	6	83.6	3.36478	3.6297	1.41607	1.73704	1.57421	1.22108	NO	Peptidase S9A, prolyl oligopeptidase; Peptidase S9, prolyl oligopeptidase active site region; Peptidase S9A, oligopeptidase, N-terminal beta-propeller; Peptidase S9, serine active site
High	Cersu1_63878	39	6	25	6	18.7	0.248683	4.24799	0.699268	6.6764	0.845065	8.46182	NO	Tropomyosin
High	Cersu1_113581	19	6	24	6	52.2	4.30231	2.45951	3.40704	4.8282	3.19072	2.49143	NO	Kynureninase; Pyridoxal phosphate-dependent transferase, major region
High	Cersu1_123796	25	6	20	6	40.5	0.704267	0.774081	1.33905	2.67324	2.29069	3.14818	NO	Isopenicillin N synthase; 2OG-Fe(II) oxygenase
High	Cersu1_114161	31	6	51	1	37.3	7.67753	7.65799	9.61755	16.0033	19.1435	19.2788	NO	Tetrapyrrole biosynthesis, hydroxymethylbilane synthase
High	Cersu1_53071	15	6	27	6	51.6	2.42879	2.05682	3.59682	3.98723	4.87783	4.04297	NO	Peptidase M24, catalytic core; Peptidase M24B, X-Pro dipeptidase/aminopeptidase P, conserved site
High	Cersu1_115831	11	6	57	6	92.4	8.8282	7.05564	8.33975	11.4055	5.61598	7.47259	YES	Peptidase M36, fungalysin; Peptidase M, neutral zinc metallopeptidases, zinc-binding site
High	Cersu1_136606	24	6	97	6	54.8	66.1403	103.652	57.6752	77.7845	4.3599	5.9803	YES	Cellulose-binding region, fungal; Glycoside hydrolase, family 7; Concanavalin A-like lectin/glucanase
High	Cersu1_123238	7	5	19	5	95.9	3.25002	1.13769	2.05448	1.36844	1.6058	1.58225	NO	AAA ATPase, core; ATP-binding region, ATPase-like; AAA+ ATPase, core; 26S proteasome subunit P45; AAA ATPase, conserved site
High	Cersu1_83583	27	5	11	4	31.7	0.509802	0.410632	1.12314	1.85546	3.15908	3.37051	NO	Short-chain dehydrogenase/reductase SDR; Glucose/ribitol dehydrogenase; NAD(P)-binding
High	Cersu1_112773	21	5	20	5	41	3.57853	3.99835	3.37422	4.69788	3.51245	3.92085	NO	Oxidoreductase, N-terminal; NAD(P)-binding
High	Cersu1_86093	19	5	33	5	37.8	7.06685	6.39133	5.0216	6.96571	5.79389	4.57075	NO	D-isomer specific 2-hydroxyacid dehydrogenase, catalytic region; D-isomer specific 2-hydroxyacid dehydrogenase, NAD-binding; NAD(P)-binding
High	Cersu1_113534	13	5	15	5	50.3	1.75004	2.19206	2.75536	5.489	4.18042	6.42219	NO	Oxidoreductase, N-terminal; Oxidoreductase putative, C-terminal; NAD(P)-binding
High	Cersu1_117293	9	5	12	5	70.2	0.909891	2.30116	0.971422	3.47082	0.73601	2.46798	NO	FAD-dependent pyridine nucleotide-disulphide oxidoreductase; Pyridine nucleotide-disulphide oxidoreductase, class I; Fumarate reductase/succinate dehydrogenase flavoprotein, N-terminal; Fumarate reductase/succinate dehydrogenase flavoprotein, C-terminal; Succinate dehydrogenase or fumarate reductase, flavoprotein subunit; Succinate dehydrogenase, flavoprotein subunit; Fumarate reductase/succinate…
High	Cersu1_110544	15	5	16	5	60	5.46921	5.4346	2.38171	3.44754	2.51184	2.91795	YES	Histidine acid phosphatase
High	Cersu1_55160	30	5	19	4	21.2	1.96606	1.6936	2.78062	3.26056	2.1861	3.18661	NO	Ras GTPase; Ras; Ras small GTPase, Ras type; Ras small GTPase, Rho type; Ras small GTPase, Rab type; Small GTP-binding protein
High	Cersu1_79631	20	5	13	5	38.6	1.80371	15.9715	1.22718	11.3168	1.89979	7.84465	NO	Metal-dependent protein hydrolase; C2 calcium/lipid-binding region, CaLB
High	Cersu1_81211	28	5	25	5	21.5	7.60504	4.95496	5.22589	5.155	2.72289	2.53935	NO	Ribosomal protein L22/L17; Ribosomal protein L22/L17, eukaryotic/archaeal
High	Cersu1_110917	9	5	10	5	93.5	1.8324	1.47817	2.79579	1.48155	3.20193	0.945541	NO	WD40 repeat; Coatomer, WD associated region; Coatomer, beta' subunit; WD40 repeat-like
High	Cersu1_111193	35	5	28	5	23.9	4.41134	6.26747	4.1946	6.16039	4.32917	4.97843	NO	Phosphoribosyltransferase; Uracil phosphoribosyl transferase
High	Cersu1_86596	17	5	15	5	44.4	2.81171	2.15179	3.60139	4.2309	1.9668	3.55863	NO	Heat shock protein DnaJ; Heat shock protein DnaJ, N-terminal; Heat shock protein DnaJ, cysteine-rich region; Chaperone DnaJ, C-terminal; HSP40/DnaJ peptide-binding
High	Cersu1_82782	10	5	29	5	68.5	4.92195	6.30184	4.27685	7.464	3.85511	3.96257	NO	Histidine acid phosphatase
High	Cersu1_111168	17	5	32	5	46.2	8.37039	3.92384	6.04347	7.38703	2.77007	2.66514	NO	Peptidase M28
High	Cersu1_80796	10	5	89	5	58.3	71.6224	75.8525	26.3227	40.1437	21.872	29.1656	NO
High	Cersu1_91152	14	5	113	5	65.7	21.128	23.3363	45.5877	77.5065	65.6714	81.1712	YES	Peptidase S53, propeptide; Peptidase S8 and S53, subtilisin, kexin, sedolisin; Proteinase inhibitor, propeptide
High	Cersu1_113196	18	5	22	5	47.4	5.54969	2.70253	2.89401	2.67863	3.88865	2.67625	NO	Adenylosuccinate synthetase
High	Cersu1_117687	10	5	20	4	56.5	3.05087	5.33484	2.93422	5.38818	2.30846	4.56865	YES	Peptidase S10, serine carboxypeptidase
High	Cersu1_112191	14	5	29	5	57.3	2.50731	1.84274	2.6833	4.8493	3.28028	4.05768	NO	ATPase, F1/V1/A1 complex, alpha/beta subunit, nucleotide-binding; ATPase, F1/V1/A1 complex, alpha/beta subunit, C-terminal; ATPase, F1/V1/A1 complex, alpha/beta subunit, N-terminal; ATPase, V1 complex, subunit B
High	Cersu1_123286	46	5	11	5	12.2			0.0551673	1.45655	0.801011	10.28	NO	Stress responsive alpha-beta barrel; Dimeric alpha-beta barrel
High	Cersu1_117448	22	5	11	5	34.8	2.02477	1.67922	1.51323	2.34901	1.6272	1.47072	NO	Serine/threonine-specific protein phosphatase and bis(5-nucleosyl)-tetraphosphatase; Metallophosphoesterase
High	Cersu1_117657	18	5	11	5	53	1.23133	1.52228	1.09673	8.33992	4.42224	7.20891	NO	Pyruvate carboxyltransferase; Homocitrate synthase, fungi and archaea; Alpha-isopropylmalate/homocitrate synthase, conserved site
High	Cersu1_159178	23	5	12	5	44	0.182847	0.431536	1.81055	2.81941	3.11204	3.6439	NO	Taurine catabolism dioxygenase TauD/TfdA
High	Cersu1_111745	38	5	24	5	21.7	1.18148	1.20011	1.58076	4.10109	2.45344	4.58977	NO	Ras GTPase; Ras; Ras small GTPase, Ras type; Ras small GTPase, Rho type; Ras small GTPase, Rab type; Small GTP-binding protein
High	Cersu1_148965	19	5	20	5	34.7	1.61366	2.39553	1.82813	3.72974	2.77203	4.79373	NO	Peptidase S33, prolyl aminopeptidase; Alpha/beta hydrolase fold-1; Peptidase S33, tricorn interacting factor 1
High	Cersu1_110117	30	5	30	4	34.2	2.45083	2.47071	3.8228	4.62655	9.41069	7.95269	NO
High	Cersu1_110814	12	5	7	5	61.3	1.48628	0.193741	1.30745	1.61237	1.4525	1.32588	NO	Chaperonin Cpn60; Chaperonin Cpn60/TCP-1; T-complex protein 1, eta subunit; Protein kinase ATP binding, conserved site; Chaperonin TCP-1, conserved site; GroEL-like chaperone, ATPase
High	Cersu1_116421	13	5	11	4	70.7	9.9217	10.4435	1.51906	1.24213	5.60432	5.45553	NO
High	Cersu1_115440	10	5	17	5	63.7	1.1896	1.06745	1.24957	2.54226	1.66219	1.65787	NO	Hydantoinase B/oxoprolinase
High	Cersu1_147624	19	5	13	5	31.2	0.83488	4.50021	1.11001	6.71644	0.964657	4.05596	NO	Isopentenyl-diphosphate delta-isomerase; NUDIX hydrolase, core; Isopentenyl-diphosphate delta-isomerase, type 1; NUDIX
High	Cersu1_112679	16	5	15	5	49.7	1.47166	0.431162	4.88394	4.73058	1.46892	2.51605	YES	Thioredoxin-related; Thioredoxin domain; Thioredoxin-like fold
High	Cersu1_144310	15	5	21	5	59.8	1.1965	1.57522	1.13627	1.77584	1.57426	2.81003	NO	Chaperonin Cpn60; Chaperonin Cpn60/TCP-1; T-complex protein 1, zeta subunit; Chaperonin TCP-1, conserved site; GroEL-like chaperone, ATPase
High	Cersu1_81235	13	5	15	5	62.3	4.04023	6.4406	3.04959	13.7223	3.13635	16.3686	YES	Peptidase S28
High	Cersu1_146139	13	5	20	5	66.6	2.65863	2.4589	1.94426	3.37582	0.871674	1.02169	NO	Heat shock protein 70; Heat shock protein Hsp70
High	Cersu1_82644	26	5	9	5	31.1	1.12886	2.36521	2.04213	4.32378	1.25913	2.37976	NO	Methyltransferase type 11
High	Cersu1_116341	12	5	24	5	75.6	2.39076	3.25444	1.74823	3.42464	1.41096	2.16812	YES	Peptidase S41
High	Cersu1_134059	21	5	78	5	63.3	4.89287	6.65246	5.319	16.7003	2.43155	7.21356	YES	Peptidase S53, propeptide; Peptidase S8 and S53, subtilisin, kexin, sedolisin; Proteinase inhibitor, propeptide
High	Cersu1_118838	36	5	20	5	17	15.3247	11.5657	10.2213	10.0943	9.56722	7.50048	NO	Ribosomal protein S15; Ribosomal protein S13/S15, N-terminal; S15/NS1, RNA-binding
High	Cersu1_83841	11	5	28	5	65.5	2.44184	6.62929	1.87448	7.10085	2.62269	5.25171	NO	Peptidase M24, catalytic core; Creatinase
High	Cersu1_107569	13	5	34	5	63.5	17.2372	14.9242	10.4363	12.0795	7.50315	8.73972	YES	Peptidase S8 and S53, subtilisin, kexin, sedolisin; Peptidase S53, propeptide; Proteinase inhibitor, propeptide
High	Cersu1_82045	21	5	41	5	20.1	20.5627	22.8358	11.0322	16.5356	8.197	14.8785	NO	Ribosomal protein L5
High	Cersu1_89084	58	5	8	5	11.7	0.136661		0.271247	0.123902	0.311006	11.1878	NO	Peptidyl-prolyl cis-trans isomerase, FKBP-type
High	Cersu1_104322	5	5	12	5	169.3			0.35688		0.71207	0.938839	NO	Amylo-alpha-1,6-glucosidase; Six-hairpin glycosidase-like; Glycoside hydrolase, catalytic core
High	Cersu1_45712	28	5	17	5	28	1.87617	2.17943	2.07311	2.85923	1.57047	2.88527	NO	Calponin-like actin-binding; EB1, C-terminal; Calponin-homology
High	Cersu1_87490	18	5	14	5	38.2	9.35525	6.20945	11.5214	15.8295	4.68157	2.64221	NO	Isocitrate lyase and phosphorylmutase, core; Isocitrate lyase and phosphorylmutase; Pyruvate/Phosphoenolpyruvate kinase, catalytic core
High	Cersu1_116253	5	5	8	5	134.8	1.78264		2.44729	0.560995	1.50981		NO	WD40 repeat; Coatomer, WD associated region; Coatomer, alpha subunit, C-terminal; Coatomer, alpha subunit; WD40 repeat-like; Cytochrome cd1-nitrite reductase-like, C-terminal haem d1
High	Cersu1_88943	21	5	13	5	38	1.93729	1.61362	1.76214	2.02221	2.07214	1.28301	NO	Inositol monophosphatase; 3(2),5 -bisphosphate nucleotidase HAL2
High	Cersu1_149813	18	5	35	5	51.9	2.5776	3.53899	3.68503	4.85383	12.0982	18.2528	NO	Peptidase S10, serine carboxypeptidase
High	Cersu1_86611	17	5	23	5	44.8	3.23375	1.98172	3.15008	3.93653	3.10724	3.10176	NO	Protein kinase, core; Serine/threonine protein kinase-related; Tyrosine protein kinase; Serine/threonine protein kinase; Protein kinase ATP binding, conserved site; Serine/threonine protein kinase, active site; Protein kinase-like
High	Cersu1_111191	17	5	36	5	42.9	8.07029	8.72549	4.1512	5.87277	6.69111	7.5584	YES	Oxidoreductase, N-terminal; Oxidoreductase, C-terminal; NAD(P)-binding
High	Cersu1_117475	13	5	16	5	59.6	4.404	2.57678	2.07992	3.24236	3.7447	3.58718	NO	Chaperonin Cpn60; Chaperonin Cpn60/TCP-1; T-complex protein 1, epsilon subunit; Chaperonin TCP-1, conserved site; GroEL-like chaperone, ATPase
High	Cersu1_118129	15	5	15	5	48.3	2.70221	2.58187	2.49562	2.78267	2.634	2.67843	NO	Protein kinase, core; JNK MAP kinase; Serine/threonine protein kinase-related; Tyrosine protein kinase; Serine/threonine protein kinase; Protein kinase ATP binding, conserved site; Serine/threonine protein kinase, active site; Protein kinase-like
High	Cersu1_118681	15	5	190	5	41.7	318.74	337.027	299.14	445.997	265.627	311.102	NO	Peptidase A1; Peptidase aspartic, active site; Peptidase aspartic, catalytic
High	Cersu1_97644	46	5	21	4	13.4	0.693711	0.815562	0.152731	1.13946	1.82916	34.406	NO	Macrophage migration inhibitory factor
High	Cersu1_111689	18	5	10	5	50.2	1.80817	1.20251	0.973179	0.991523	0.750485	0.533897	NO	Aminotransferase class-III; Acetylornithine and succinylornithine aminotransferase; Pyridoxal phosphate-dependent transferase, major region
High	Cersu1_110856	37	5	41	5	18.6	13.9175	13.8727	7.1109	8.51339	4.02153	5.27102	NO	Ribosomal protein L21e; Translation protein SH3-like
High	Cersu1_85364	22	5	14	5	33.1	1.97958	0.726466	0.891666	0.850636	2.06955	1.69272	NO	Glutathione S-transferase, C-terminal-like; Thioredoxin-like fold
High	Cersu1_50686	27	5	92	3	40.3	32.6036	79.5122	90.8526	201.586	8.20602	24.2529	YES	Haem peroxidase, plant/fungal/bacterial; Fungal lignin peroxidase; Haem peroxidase
High	Cersu1_80971	25	5	23	3	26.6	5.4991	5.97073	4.74662	8.00686	5.46844	6.45395	NO	Pyruvate kinase, barrel; Short-chain dehydrogenase/reductase SDR; Glucose/ribitol dehydrogenase; NAD(P)-binding
High	Cersu1_112726	20	5	13	5	29.4	2.64243	2.50614	3.02478	2.9339	2.8152	2.96763	NO	Eukaryotic phosphomannomutase; HAD-superfamily hydrolase, subfamily IIB
High	Cersu1_111502	19	5	20	4	44.7	1.72868	1.99413	2.11047	1.94444	2.6319	1.77346	NO	DNA/RNA helicase, DEAD/DEAH box type, N-terminal; DNA/RNA helicase, C-terminal; DEAD-like helicase, N-terminal; Helicase, superfamily 1 and 2, ATP-binding; RNA helicase, DEAD-box type, Q motif; RNA helicase, ATP-dependent, DEAD-box, conserved site
High	Cersu1_115926	10	5	11	4	68	1.48125	1.01108	0.895784	1.79557	2.78784	1.86338	NO	FAD-dependent pyridine nucleotide-disulphide oxidoreductase
High	Cersu1_139624	9	5	31	5	110.7	4.67426	4.56185	3.03547	2.56011	4.31932	3.35057	NO
High	Cersu1_59320	29	5	72	5	24.6	15.9185	18.4264	13.5235	16.7402	17.6894	18.1707	NO	HpcH/HpaI aldolase; Pyruvate/Phosphoenolpyruvate kinase, catalytic core
High	Cersu1_83595	16	5	29	5	48.2	10.8806	5.82182	7.05223	4.95871	5.73094	2.50871	NO	Aminotransferase class-III; Pyridoxal phosphate-dependent transferase, major region
High	Cersu1_111406	27	5	24	5	25.6	4.37071	9.99382	3.41341	7.5646	4.0535	5.86797	NO
High	Cersu1_79585	25	5	18	5	34.6	0.775014	2.89179	2.66299	4.94241	2.55908	3.33368	NO	Succinyl-CoA ligase, alpha subunit; ATP-citrate lyase/succinyl-CoA ligase; CoA-binding; ATP-citrate lyase/succinyl-CoA ligase, active site; NAD(P)-binding; Succinyl-CoA synthetase-like
High	Cersu1_154754	26	5	14	3	30.9	13.0052	3.07564	6.10282	0.681084	7.61532	0.339504	NO	Short-chain dehydrogenase/reductase SDR; Glucose/ribitol dehydrogenase; NAD(P)-binding
High	Cersu1_112109	20	5	20	5	34.1	1.28626	4.46724	1.5366	4.69114	0.326529	1.77759	NO	Thiamine biosynthesis Thi4 protein
High	Cersu1_115105	16	5	13	5	47.7	0.931433	1.22184	1.04267	2.33391	1.78741	2.46222	NO	Protein of unknown function DUF1688
High	Cersu1_125283	22	5	33	5	26.6	3.99819	5.00412	5.39944	9.35218	11.6422	11.9489	NO	Short-chain dehydrogenase/reductase SDR; Glucose/ribitol dehydrogenase; NAD(P)-binding
High	Cersu1_113358	15	5	21	5	59.9	3.2163	9.1457	1.05343	5.07295	0.267927	1.71474	YES	Carboxylesterase, type B
High	Cersu1_88352	26	5	28	5	22.6	8.01184	3.42692	6.0808	3.42156	4.86351	1.88274	NO	Ribosomal protein S7; Ribosomal protein S7, eukaryotic/archaeal
High	Cersu1_113652	22	5	12	5	40.1	1.28824	4.65004	0.854794	6.4584	0.724673	8.19586	NO	Protein prenyltransferase, alpha subunit
High	Cersu1_86597	25	5	16	5	33.6	5.14921	6.61179	4.00948	7.42051	3.71527	4.31101	NO	Nitrilase/cyanide hydratase and apolipoprotein N-acyltransferase; Protein of unknown function UPF0012, conserved site
High	Cersu1_90011	24	5	24	5	23.8	5.45213	8.16352	5.18576	8.11928	4.87531	11.5957	NO	CS; CS domain; HSP20-like chaperone
High	Cersu1_117240	16	4	29	4	41.9	2.46476	2.22246	2.96184	6.68547	11.0594	17.729	YES	Peptidase A1; Peptidase aspartic, active site; Peptidase aspartic, catalytic
High	Cersu1_117046	26	4	7	4	44.9	0.223967	1.73628	0.108371	5.35055	1.1374	9.45035	YES	Cellulose-binding region, fungal; Glycoside hydrolase, family 5; Glycoside hydrolase, catalytic core
High	Cersu1_113472	17	4	9	4	47.8	1.14363	3.15805	1.05478	5.33492	0.809509	2.75108	NO	UBA/THIF-type NAD/FAD binding fold; Ubiquitin-activating enzyme repeat; E2 binding; Ubiquitin-activating enzyme, E1; Molybdenum cofactor biosynthesis
High	Cersu1_118090	22	4	9	4	53	1.75499	0.87124	2.25005	1.41524	4.98234	1.63447	NO	Aminotransferase, class V/Cysteine desulphurase; Pyridoxal phosphate-dependent transferase, major region
High	Cersu1_113407	16	4	9	4	43.4	1.64698	0.922083	0.894105	0.60076	0.649522	0.25535	NO	Proteasome component region PCI; Tubulin binding cofactor A
High	Cersu1_81493	42	4	31	4	15.4	3.60558	2.86421	3.73602	9.49729	5.63152	10.955	NO	Actin-binding, cofilin/tropomyosin type
High	Cersu1_113364	12	4	11	4	54.2	0.69219	1.67788	0.726408	2.27928	0.727053	3.43929	NO	Crotonase, core
High	Cersu1_88420	23	4	16	4	30.8	1.78864	2.25464	2.11605	4.63914	2.75179	4.10514	NO	Phosphogluconate dehydrogenase, NAD-binding, putative, C-terminal; 6-phosphogluconate dehydrogenase, C-terminal-like; NAD(P)-binding
High	Cersu1_118536	8	4	13	4	60.1	1.98027	1.38504	1.77594	1.99229	2.4065	2.69075	NO	Chaperonin Cpn60; Chaperonin Cpn60/TCP-1; T-complex protein 1, gamma subunit; Chaperonin TCP-1, conserved site; GroEL-like chaperone, ATPase
High	Cersu1_110805	20	4	27	3	36	0.828534	0.917378	1.48614	2.01575	2.77449	2.82437	NO	Alcohol dehydrogenase, zinc-binding; Alcohol dehydrogenase GroES-like; GroES-like; NAD(P)-binding
High	Cersu1_88125	22	4	6	4	29.2		1.58589		5.22917	0.330065	2.66791	NO	HAD-superfamily hydrolase, subfamily IB, PSPase-like; HAD-superfamily hydrolase, subfamily IB, hypothetical 1
High	Cersu1_110265	14	4	7	4	45	4.02148	3.36302	0.591874	0.699375	0.689907	0.547608	NO	Glycoside hydrolase, clan GH-D; Glycoside hydrolase, family 27; Glycoside hydrolase, catalytic core
High	Cersu1_118127	21	4	11	3	35	3.70484	3.49565	2.76409	4.05662	2.9062	3.61506	NO	Aldo/keto reductase
High	Cersu1_111806	19	4	6	4	32.6	1.91304	1.3442	0.533169	0.634853	0.66684	0.218166	NO	ATP phosphoribosyltransferase, catalytic region; Histidine biosynthesis HisG, C-terminal; Nitrogen regulatory PII-like, alpha/beta
High	Cersu1_41471	30	4	20	4	24.1	3.81783	7.5053	1.39566	3.29944	1.25904	1.51795	NO	Carbonic anhydrase
High	Cersu1_119365	21	4	16	4	33.3	2.57471	4.91303	2.39975	5.67001	1.20533	12.8705	NO	Cellular retinaldehyde binding/alpha-tocopherol transport; Cellular retinaldehyde-binding/triple function, C-terminal; Cellular retinaldehyde-binding/triple function, N-terminal; Phosphatidylinositol transfer protein-like, N-terminal
High	Cersu1_86159	11	4	9	3	44.4	1.02095	1.2639	1.31218	1.05408	0.956421	1.27344	NO	AAA ATPase, core; AAA+ ATPase, core; 26S proteasome subunit P45; AAA ATPase, conserved site
High	Cersu1_111706	17	4	18	4	34.5	2.178	3.577	2.70431	5.57012	3.21608	4.22355	NO	Purine phosphorylase, family 2; Methylthioadenosine phosphorylase
High	Cersu1_110698	25	4	16	4	21.6	4.52561	4.00338	4.51325	4.67011	3.03421	3.50063	NO	Calycin-like
High	Cersu1_114069	7	4	22	3	102.3	2.6511	2.19818	2.96972	3.34659	3.46642	2.50549	NO	Amidohydrolase 1; Metal-dependent hydrolase, composite
High	Cersu1_115082	6	4	9	4	69.4	0.574386	1.28487	0.684917	4.33697	1.36313	6.23773	YES	Peptidase S53, propeptide; Peptidase S8 and S53, subtilisin, kexin, sedolisin; Proteinase inhibitor, propeptide
High	Cersu1_110561	7	4	21	4	82.9	7.39145	6.21527	2.5246	2.57209	2.5677	2.41353	YES	Polysaccharide lyase family 8, central; Chondroitin AC/alginate lyase; Glycoside hydrolase-type carbohydrate-binding
High	Cersu1_110754	15	4	13	4	40.4	1.27923	1.99286	0.309806	1.91953	0.514072	0.959539	NO	Mov34-1; Mov34/MPN/PAD-1
High	Cersu1_94795	13	4	157	4	47.4	123.523	96.7352	55.4584	67.4739	8.57626	8.91889	YES	Cellulose-binding region, fungal; Glycoside hydrolase, family 5; Glycoside hydrolase, catalytic core
High	Cersu1_111770	20	4	13	4	27.8	0.1558	0.64561	0.756391	1.5527	5.93126	6.0296	NO	Short-chain dehydrogenase/reductase SDR; Glucose/ribitol dehydrogenase; NAD(P)-binding
High	Cersu1_79893	9	4	11	4	60.2	9.26564	3.05096	3.90158	1.64762	7.21934	0.96562	NO	Isocitrate lyase and phosphorylmutase, core; Isocitrate lyase and phosphorylmutase; Isocitrate lyase; Pyruvate/Phosphoenolpyruvate kinase, catalytic core
High	Cersu1_114046	6	4	11	2	104.3	2.9976	1.77681	2.32239	2.71886	4.35815	2.43897	NO	Amidohydrolase 3; Metal-dependent hydrolase, composite
High	Cersu1_112536	11	4	13	4	38.8	0.900955	2.32211	1.04582	3.95349	1.81686	6.55197	NO	Cellular retinaldehyde-binding/triple function, C-terminal; Cellular retinaldehyde-binding/triple function, N-terminal; Phosphatidylinositol transfer protein-like, N-terminal
High	Cersu1_21396	14	4	56	2	40.6	4.39925	4.70396					NO
High	Cersu1_104192	54	4	32	4	12.1	3.02393	3.56697	2.49236	7.67235	3.78912	9.20063	NO	Ribosomal protein L7Ae/L30e/S12e/Gadd45; Ribosomal protein L30e
High	Cersu1_80925	11	4	10	4	78.2	3.62046	0.669607	1.4224	0.607947	1.70945	0.282897	NO	Glycoside hydrolase 15-related; Six-hairpin glycosidase-like
High	Cersu1_81995	17	4	7	4	52.1	0.895255	1.41684	1.67342	3.36139	0.138439	0.364697	NO	Hydroxymethylglutaryl-coenzyme A synthase, N-terminal; Hydroxymethylglutaryl-coenzyme A synthase C-terminal; Hydroxymethylglutaryl-CoA synthase, eukaryotic; Thiolase-like
High	Cersu1_121599	8	4	13	4	55.4	1.99768	29.3621	2.57294	46.3984	2.4811	45.9855	YES	Peptidase S10, serine carboxypeptidase
High	Cersu1_108057	44	4	33	4	18.6	6.73949	9.0331	7.13639	11.8619	10.7871	12.113	NO	Glyoxalase/bleomycin resistance protein/dioxygenase; Glyoxalase I
High	Cersu1_157056	18	4	6	4	43.7		0.1124	0.273267	0.53724	0.918146	1.74404	NO	Alpha/beta hydrolase fold-3
High	Cersu1_119020	18	4	23	4	28.7	3.15833	5.78486	3.05613	4.95735	3.2895	5.59071	NO	Mitochondrial glycoprotein
High	Cersu1_119756	14	4	50	3	43.2	7.79323	7.88137	4.94349	8.80304	6.99818	8.32293	NO	Aldo/keto reductase
High	Cersu1_112950	11	4	13	3	44.4	1.04179	0.818599	0.503794	0.947284	0.824414	2.28855	NO	AAA ATPase, core; AAA+ ATPase, core; 26S proteasome subunit P45; AAA ATPase, conserved site
High	Cersu1_112193	23	4	8	4	37.6		0.278572	0.838981	1.69553	2.81833	5.63768	NO	Isopenicillin N synthase; 2OG-Fe(II) oxygenase
High	Cersu1_119136	17	4	8	4	36.2	3.92861	2.86493	1.37249	1.81723	0.807939	0.192701	NO	Alcohol dehydrogenase, zinc-binding; Alcohol dehydrogenase GroES-like; Quinone oxidoreductase/zeta-crystallin, conserved site; GroES-like; NAD(P)-binding
High	Cersu1_121703	20	4	20	4	24.3	0.710316	0.772822	2.61374	2.89099	3.91374	5.84153	NO
High	Cersu1_80614	26	4	17	4	20.9	8.89921	8.86389	2.92202	9.48495	1.1694	2.58546	NO	Ribosomal protein L18e
High	Cersu1_84717	17	4	12	4	37.4	2.35244	3.24892	1.80067	2.8434	2.12311	3.92737	NO	Alcohol dehydrogenase, zinc-binding; Alcohol dehydrogenase GroES-like; GroES-like; NAD(P)-binding
High	Cersu1_84774	49	4	14	4	13	1.37831	0.576037	0.822355	1.92581	4.67417	14.6429	NO	Profilin/allergen; Profilin, plant
High	Cersu1_81851	34	4	10	4	14.7	4.84726	0.646406	2.88632	0.501222	2.69208	2.03368	NO	Histone H2A; Histone core; Histone-fold
High	Cersu1_83889	33	4	19	3	15.6	4.37824	3.25206	2.30662	5.20018	2.57419	3.77605	NO	Ribosomal protein L27e
High	Cersu1_115768	18	4	31	4	29.8	3.70168	4.0601	2.65955	4.38098	3.85849	3.68015	NO	20S proteasome, A and B subunits; Proteasome endopeptidase complex, beta subunit; Proteasome, beta-type subunit, conserved site
High	Cersu1_86762	27	4	18	4	18.2	1.97615	5.88384	1.41608	6.30923	0.846719	3.63325	NO	Glutathione peroxidase; Thioredoxin-like fold
High	Cersu1_104887	28	4	22	4	21.5	2.71231	2.14899	4.34987	6.43705	2.99466	4.73432	NO	ARF/SAR superfamily; ADP-ribosylation factor; GTP-binding protein SAR1; Small GTP-binding protein
High	Cersu1_88667	24	4	10	4	25	2.16605	1.80876	1.04825	1.55883	1.13102	1.27116	NO	Phosphoribosyltransferase
High	Cersu1_114253	15	4	10	4	28.1	3.80815	2.91048	2.35985	3.08897	1.34643	0.795657	NO	Ribosomal protein S5, N-terminal; Ribosomal protein S5, C-terminal; Ribosomal protein S5, eukaryotic/archaeal
High	Cersu1_88444	13	4	34	4	56.5	5.01593	3.65363	4.92996	7.76878	2.73961	4.91574	NO	Peptidase C1B, bleomycin hydrolase; Peptidase, cysteine peptidase active site
High	Cersu1_110059	26	4	16	4	21.4	0.925134	1.39486	3.0207	6.6759	3.98071	6.63488	NO	TB2/DP1 and HVA22 related protein
High	Cersu1_159781	10	4	50	1	60.9	1.35903		1.17541		2.02396		NO	Carboxylesterase, type B
High	Cersu1_118003	36	4	40	4	13.8	11.5047	9.8069	9.51162	14.5158	9.85134	13.3598	NO	Ribosomal protein S10; Ribosomal protein S10, eukaryotic/archaeal
High	Cersu1_120271	18	4	8	4	39.2	0.621236	1.09397	0.7023	1.5621	0.995365	1.82479	NO	Protein kinase, core; MAP kinase, p38; Serine/threonine protein kinase-related; Tyrosine protein kinase; Serine/threonine protein kinase; Serine/threonine protein kinase, active site; MAP kinase, conserved site; Protein kinase-like
High	Cersu1_96205	8	4	8	3	68.7	2.12259	0.566401	2.05971	0.912407	3.35222	1.19526	NO	FAD-dependent pyridine nucleotide-disulphide oxidoreductase
High	Cersu1_71628	19	4	49	4	43.8	7.87454	6.59476	27.4572	28.8338	23.3408	34.8961	NO	Peptidase A1; Peptidase aspartic, active site; Peptidase aspartic, catalytic
High	Cersu1_43251	8	4	11	4	56.4	1.61892	1.46098	1.47002	2.70479	1.1565	2.70045	NO	Proteasome component region PCI
High	Cersu1_117697	11	4	50	1	59.1							YES	Carboxylesterase, type B
High	Cersu1_35226	25	4	14	4	23.5	0.428717	0.618731	2.29733	2.51351	4.10523	3.95396	NO	Formyl transferase, N-terminal; Phosphoribosylglycinamide formyltransferase; Phosphoribosylglycinamide formyltransferase, active site
High	Cersu1_157986	15	4	29	3	44.3	0.904378	1.45789	14.7038	39.4302	2.70551	4.96767	YES	Haem peroxidase, plant/fungal/bacterial; Fungal lignin peroxidase; Haem peroxidase
High	Cersu1_110118	15	4	29	3	34.1	4.46872	6.46828	2.8081	9.79406	2.8625	4.11175	NO
High	Cersu1_116831	20	4	51	2	28.5	0.805817	0.840384	0.439848	0.683312	3.56672	3.35078	NO	Glutathione S-transferase, N-terminal; Glutathione S-transferase, C-terminal-like; Thioredoxin-like fold
High	Cersu1_87578	8	4	14	4	63.5	4.25094	2.93072	5.01377	4.6323	3.40417	2.83499	NO	Aspartyl-tRNA synthetase, class IIb; Aminoacyl-tRNA synthetase, class II (D, K and N); Nucleic acid binding, OB-fold, tRNA/helicase-type; Asparaginyl-tRNA synthetase, class IIb; Aminoacyl-tRNA synthetase, class II; Nucleic acid-binding, OB-fold-like
High	Cersu1_110189	16	4	7	4	40.1	3.45275	13.1499	2.4403	12.721	2.84212	8.18031	NO	Protein kinase, core; Serine/threonine protein kinase-related; Tyrosine protein kinase; Serine/threonine protein kinase; Protein kinase ATP binding, conserved site; Serine/threonine protein kinase, active site; Protein kinase-like
High	Cersu1_84231	44	4	19	4	14.7	0.969575	0.708582	2.18994	3.22633	4.29832	5.07111	NO	Ribosomal protein S8
High	Cersu1_117877	13	4	11	4	66.7	2.84133	1.05556	2.29167	1.2575	1.5185	1.17284	NO	Lysyl-tRNA synthetase, class II; Aminoacyl-tRNA synthetase, class II (D, K and N); Nucleic acid binding, OB-fold, tRNA/helicase-type; Aminoacyl-tRNA synthetase, class II; Nucleic acid-binding, OB-fold-like
High	Cersu1_114128	9	4	22	4	58.2	2.74177	4.30613	2.29384	4.75527	1.26714	3.04433	NO
High	Cersu1_52036	9	4	19	1	40.4	1.69939	2.11612	2.70875	2.82312	5.35231	4.669	NO	NADH:flavin oxidoreductase/NADH oxidase, N-terminal
High	Cersu1_115046	10	4	24	4	52	2.14401	1.85343	3.10857	3.66486	3.93755	4.80474	NO	Aminotransferase, class I and II; Pyridoxal phosphate-dependent transferase, major region
High	Cersu1_113562	4	4	8	4	107.4	0.511926	0.432322	0.514994	0.913081	0.376019	0.887637	NO	Kinesin, motor region; Protein of unknown function DUF465; Prefoldin
High	Cersu1_110824	8	4	10	4	101.7	1.44321	0.967091	0.697469	0.890547	0.657015	3.3713	NO	Clathrin/coatomer adaptor, adaptin-like, N-terminal; Coatomer, gamma subunit , appendage; Coatomer, gamma subunit; Carbohydrate kinase, FGGY; Armadillo-type fold; Clathrin/coatomer adaptor, adaptin-like, appendage, Ig-like subdomain; Clathrin/coatomer adaptor, adaptin-like, appendage, C-terminal subdomain
High	Cersu1_151889	9	4	9	4	54.7	0.978058	0.490704	0.844993	1.4425	1.51033	1.7699	NO	Zinc finger, ZPR1-type
High	Cersu1_110529	19	4	17	4	34.6	1.71933	2.49727	1.51185	2.57032	1.09333	1.2588	NO	Nitrilase/cyanide hydratase and apolipoprotein N-acyltransferase
High	Cersu1_116588	41	4	8	4	17.4		1.29589		3.75389		4.50429	NO	KOW; Eukaryotic initiation factor 5A hypusine (eIF-5A); Translation protein SH3-like; Nucleic acid-binding, OB-fold-like
High	Cersu1_113281	21	4	103	4	33.1	51.9422	35.7121	15.8268	34.0232	20.3948	37.4969	YES	Lipase, GDSL; Esterase, SGNH hydrolase-type
High	Cersu1_99604	22	4	21	4	27.7	12.0545	8.42114	4.2961	4.83388	1.50239	1.66382	NO	Ribosomal protein S6e; Ribosomal protein S6, eukaryotic
High	Cersu1_82646	25	4	46	4	20.7	30.5382	37.3075	9.28914	22.4241	12.417	17.3875	NO	Nascent polypeptide-associated complex NAC; Nascent polypeptide-associated complex, alpha subunit
High	Cersu1_154934	14	4	27	4	50.8	4.13379	3.41367	3.18838	4.85187	2.56479	2.57183	YES	Peptidase M28
High	Cersu1_116113	8	4	54	4	69.5	18.7289	18.8024	18.3854	26.9338	36.7072	47.6305	YES	Peptidase S53, propeptide; Peptidase S8 and S53, subtilisin, kexin, sedolisin; Proteinase inhibitor, propeptide
High	Cersu1_115963	16	4	12	4	34.1	0.435028	1.72396	1.08476	3.97805	0.10778	0.164427	YES	Concanavalin A-like lectin/glucanase
High	Cersu1_119316	18	4	15	4	33.3	1.92159	2.74759	2.52343	4.1524	2.03733	3.13012	NO	Cellular retinaldehyde binding/alpha-tocopherol transport; Cellular retinaldehyde-binding/triple function, C-terminal; Cellular retinaldehyde-binding/triple function, N-terminal; Phosphatidylinositol transfer protein-like, N-terminal
High	Cersu1_80184	30	4	27	4	16.7	4.56973	3.32802	2.5988	5.18235	3.49778	6.74264	NO	Plectin/S10, N-terminal
High	Cersu1_139148	5	4	41	1	53.8	0.457261	290.215		192.177		147.491	NO	Aldehyde dehydrogenase; Aldehyde dehydrogenase, conserved site; Aldehyde/histidinol dehydrogenase
High	Cersu1_80861	19	4	49	4	27.9	7.54203	7.57218	5.7747	8.44512	6.56398	6.61694	NO	20S proteasome, A and B subunits; Proteasome, beta-type subunit, conserved site
High	Cersu1_116417	5	4	10	4	100.5	3.32532	5.99267	3.57207	6.36954	2.63392	2.31927	NO	Glycosyl transferase, family 20; Trehalose-phosphatase; HAD-superfamily hydrolase, subfamily IIB
High	Cersu1_79830	22	4	23	4	22.8	7.8245	3.45703	2.77896	3.21737	1.78289	1.51752	NO	Ribosomal protein L13; Ribosomal protein L13, eukaryotic/archaeal
High	Cersu1_83019	25	3	7	3	19.5	1.87623	1.25678	1.16922	2.39682	1.35847	1.69875	NO	ARP23 complex 20 kDa subunit
High	Cersu1_89943	10	3	9	3	61.6	2.64681	3.89061	0.242852	0.243636	0.629667	1.57185	NO	Cellulose-binding region, fungal; Glycoside hydrolase, family 7; Concanavalin A-like lectin/glucanase
High	Cersu1_68569	14	3	10	3	39	7.21291	6.13025	0.383573	0.654019			YES	Cellulose-binding region, fungal; Esterase, PHB depolymerase
High	Cersu1_112259	12	3	6	3	42.9	2.55046	5.0093	1.34011	2.01437	0.428564	0.0800193	YES	Arginase; Ureohydrolase
High	Cersu1_125029	10	3	58	3	25.6	236.039	182.785	52.5057	179.145	23.6985	13.7709	NO
High	Cersu1_111389	12	3	17	3	34.3	2.51132	3.12422	2.48335	4.089	2.38634	4.11345	NO	Mov34-1; Mov34/MPN/PAD-1
High	Cersu1_83114	5	3	11	3	106.8	1.19539	0.933744	2.24456	3.10029	1.82155	1.37296	NO	Beta-trefoil; LAG1, DNA binding; p53-like transcription factor, DNA-binding; Immunoglobulin E-set
High	Cersu1_50939	19	3	16	3	21.7	3.72083	4.29982	3.31618	4.04369	3.15145	4.04501	NO	20S proteasome, A and B subunits; Proteasome, beta-type subunit, conserved site
High	Cersu1_119455	6	3	24	1	63.6	7.41697	6.25977	4.79759	4.41426		1.54383	NO
High	Cersu1_113769	16	3	8	3	25.5	3.72688	2.45821	2.55137	2.47598	1.26561	1.5847	NO	Histone H1/H5
High	Cersu1_110873	17	3	25	3	24.5	15.5848	12.0771	10.8691	12.3356	4.24879	5.49306	NO	Ribosomal protein L1
High	Cersu1_117585	4	3	8	3	119.7	1.89029	0.693274	2.28137	0.664296	4.05177	0.687145	NO	HEAT; Exportin-1/Importin-beta-like; Armadillo-type fold
High	Cersu1_110790	4	3	10	1	42.3	47.2716	53.139	34.0652	44.2608	20.0723	15.8394	NO	Aldo/keto reductase; Potassium channel, voltage-dependent, beta subunit, KCNAB-related
High	Cersu1_92160	13	3	9	1	26.5		2.50231		3.41038		3.60219	NO	Short-chain dehydrogenase/reductase SDR; Glucose/ribitol dehydrogenase; NAD(P)-binding
High	Cersu1_123694	7	3	8	3	49.6	0.898858	1.59092	0.862154	2.0739	0.977562	1.81115	NO	Inosine/uridine-preferring nucleoside hydrolase
High	Cersu1_111074	9	3	9	3	38.8	0.411448	1.58876	0.492615	2.47249	0.511389	1.53853	NO	Isocitrate/isopropylmalate dehydrogenase
High	Cersu1_79775	25	3	29	3	19.7	8.10393	20.4078	4.30937	16.0605	4.11668	14.2979	YES	MD-2-related lipid-recognition
High	Cersu1_91114	8	3	8	2	65.6		3.16181	0.976436				NO	Glucose-methanol-choline oxidoreductase, N-terminal; Glucose-methanol-choline oxidoreductase, C-terminal; Glucose-methanol-choline oxidoreductase
High	Cersu1_85474	25	3	51	3	25.2	9.7534	24.0729	24.2519	31.6772	8.74204	15.9667	YES	Glycoside hydrolase, family 61
High	Cersu1_137491	8	3	10	3	58.2	3.73061	3.12084	1.97839	2.29644	2.42525	2.79418	YES	Carboxylesterase, type B
High	Cersu1_154019	6	3	20	3	116.8	25.115	21.5383	38.6702	50.9728	60.4878	64.6523	NO	Fungal transcriptional regulatory protein, N-terminal; Fungal specific transcription factor
High	Cersu1_79345	15	3	8	3	33.4	0.860768	3.09128	0.49958	2.72682	1.05266	3.44676	NO	Rhodanese-like
High	Cersu1_124390	17	3	5	3	32.1	0.156392	0.15387	0.146155	0.281319	2.73614	0.99521	NO	Alpha/beta hydrolase fold-1
High	Cersu1_83327	8	3	19	3	81.9	11.8234	10.5547	0.481491	0.711589			YES	Pectin lyase fold/virulence factor
High	Cersu1_153657	7	3	9	3	52.5	1.93481	1.91103	1.41825	2.13514	3.2351	5.35242	YES	Lysophospholipase, catalytic region; Acyl transferase/acyl hydrolase/lysophospholipase
High	Cersu1_118441	8	3	10	3	59.8	1.34676	1.98503	0.93578	2.44387	2.4288	3.57775	NO	Chaperonin Cpn60; Chaperonin Cpn60/TCP-1; T-complex protein 1, theta subunit; Chaperonin TCP-1, conserved site; GroEL-like chaperone, ATPase
High	Cersu1_56039	21	3	11	3	30.5	2.22685	1.77421	1.49407	1.92831	1.83701	1.78835	NO	Crotonase, core
High	Cersu1_58350	9	3	7	3	63		0.167947	0.740607	2.01334	0.335013	0.834231	NO	Malic oxidoreductase; Malic enzyme, N-terminal; Malic enzyme, NAD-binding; Malic enzyme, conserved site; NAD(P)-binding
High	Cersu1_86172	13	3	13	3	52.9	2.05977	3.0479	1.79309	3.82458	0.982528	1.21495	YES	Peptidase S10, serine carboxypeptidase
High	Cersu1_148560	31	3	7	3	24.6			0.888437	0.814306	2.27422	1.53261	NO	Isochorismatase hydrolase
High	Cersu1_87569	7	3	17	3	51.7	13.0719	12.6071	9.45141	14.4561	6.48266	12.5341	YES	Peptidase S8 and S53, subtilisin, kexin, sedolisin; Proteinase inhibitor I9, subtilisin propeptide; Proteinase inhibitor, propeptide
High	Cersu1_113742	18	3	11	3	35.9	1.35246		0.60591	0.932425	0.962757	0.567785	NO	6-phosphogluconate dehydrogenase, NAD-binding; 3-hydroxyisobutyrate dehydrogenase; 3-hydroxyisobutyrate dehydrogenase-related, conserved site; 6-phosphogluconate dehydrogenase, C-terminal-like; NAD(P)-binding
High	Cersu1_142239	26	3	14	3	23.5	0.627405	1.83765	0.531163	3.1207	1.62636	3.8974	NO	Protein of unknown function DUF1000
High	Cersu1_116025	7	3	11	3	56.8	2.25934	1.56507	2.58895	2.4616	3.49491	2.41957	NO	Prenyltransferase/squalene oxidase; Terpenoid cylases/protein prenyltransferase alpha-alpha toroid
High	Cersu1_116759	13	3	10	3	50.5	4.93206	2.21514	3.38718	2.31166	4.87587	2.66258	NO	Dihydroorotase region; Amidohydrolase 1; Allantoinase; Dihydroorotase, conserved site; Deoxyribonuclease, TatD-related; Metal-dependent hydrolase, composite
High	Cersu1_111694	6	3	8	3	88.1	3.43674	2.50341	1.69236	0.978842	2.85892	2.03652	YES	Glycoside hydrolase, family 3, N-terminal; Glycoside hydrolase, family 3, C-terminal; Glycoside hydrolase, catalytic core
High	Cersu1_73600	27	3	27	3	19.4	4.60135	5.84041	4.68458	15.6382	9.57752	23.5876	NO	RNA recognition motif, RNP-1
High	Cersu1_82043	5	3	8	3	71.2	1.81635	1.03266	0.603282	0.861981	2.39394	1.44679	NO	Acyltransferase ChoActase/COT/CPT
High	Cersu1_110320	11	3	7	3	40.3	0.388687	2.8429	0.189216	0.311229	0.681419	2.06836	NO	Alanine dehydrogenase/PNT, C-terminal; Alanine dehydrogenase/PNT, N-terminal; NAD(P)-binding
High	Cersu1_111711	7	3	8	3	85.1	0.964056	2.80974	0.582698	4.98641	0.397977	4.60899	YES	Glycosyl hydrolase 92; Alpha-1,2-mannosidase, putative
High	Cersu1_113451	28	3	6	3	18.4	0.546147	3.8973	0.271808	3.05789		2.70594	NO	SKP1 component, dimerisation; SKP1 component, POZ; E3 ubiquitin ligase, SCF complex, Skp subunit; SKP1 component; BTB/POZ fold
High	Cersu1_118132	13	3	15	3	32.5	1.00645	1.11856	1.54076	1.95976	2.11553	2.01528	NO	Male sterility, NAD-binding; NAD(P)-binding
High	Cersu1_118417	14	3	13	3	37.5	1.11036	0.852841	3.85714	4.48263	3.75384	2.5879	NO
High	Cersu1_114455	8	3	7	3	50.1	1.33806	0.407583	0.510341	0.5313	0.790724	0.248002	YES	Aromatic-ring hydroxylase; FAD dependent oxidoreductase
High	Cersu1_79076	16	3	16	3	33.8	21.5877	19.6517	3.29058	1.23469	0.342297	0.217627	YES	Concanavalin A-like lectin/glucanase
High	Cersu1_126611	7	3	10	2	50.3		2.46643		2.43559		1.6099	NO	Aldo/keto reductase
High	Cersu1_58176	18	3	16	3	28.5	2.9283	3.45493	3.79148	3.41921	3.26786	2.64341	NO	NIPSNAP
High	Cersu1_111955	10	3	10	3	59.9	1.97897	2.02727	2.89128	2.83991	1.19742	1.52217	YES	Glycoside hydrolase, family 20; Glycoside hydrolase, family 20, catalytic core; Beta-N-acetylhexosaminidase-like; Glycoside hydrolase, catalytic core
High	Cersu1_147209	26	3	9	3	12	5.854	5.67999	2.82399	1.9588	3.51821	4.35316	NO	Histone H4; Histone core; Histone-fold
High	Cersu1_120142	22	3	12	3	24.7	4.49156	5.54174	3.33414	7.20523	1.943	3.60267	NO	Carbonic anhydrase; Carbonic anhydrase, prokaryotic-like, conserved site
High	Cersu1_113829	6	3	9	3	91.3	2.18042	0.584119	2.09074	0.926794	1.93008		YES	Glycoside hydrolase, family 63; Six-hairpin glycosidase-like
High	Cersu1_83978	18	3	19	3	32.2	4.53009	6.49573	4.96442	8.43413	3.54043	4.85599	NO	Haloacid dehalogenase-like hydrolase; 2-phosphoglycolate phosphatase, eukaryotic; HAD-superfamily hydrolase, subfamily IIA
High	Cersu1_119299	13	3	14	3	31.5	0.688737	2.19194	1.15134	2.67871	0.595231	1.16295	NO	RNA recognition motif, RNP-1; Translation initiation factor 3, RNA-binding subunit
High	Cersu1_86739	11	3	7	3	32.7		3.43723		2.41273		1.96351	NO	Dihydrodipicolinate synthetase
High	Cersu1_112673	8	3	9	3	51.1	2.2394	1.67141	2.05356	1.63035	3.28628	1.49199	NO	Protein phosphatase 2A, regulatory subunit PR55; WD40 repeat; WD40 repeat-like
High	Cersu1_114658	15	3	81	3	42.4	21.7908	20.1865	26.3441	29.3281	22.1459	21.3024	YES	Peptidase A1; Peptidase aspartic, active site; Peptidase aspartic, catalytic
High	Cersu1_111982	7	3	7	3	52.4	3.06224	1.99327	4.84646	2.48963	7.03712	2.34929	NO	Peptidase M16, N-terminal; Peptidase M16, C-terminal; Peptidase M16, zinc-binding site; Metalloenzyme, LuxS/M16 peptidase-like, metal-binding
High	Cersu1_109067	4	3	8	3	105.7	0.76711	1.06576	0.699479	2.20649	0.887505	1.87158	NO	Hydantoinase/oxoprolinase; Hydantoinaseoxoprolinase, N-terminal; Protein of unknown function DUF917
High	Cersu1_86532	10	3	12	3	44.4	5.01908	4.15283	1.4104	1.06804	1.14337	1.42644	YES	Glycosyl hydrolase, family 88; Six-hairpin glycosidase-like
High	Cersu1_112301	10	3	7	3	61.6	3.39542	4.05336	0.143441	0.502473			YES	Glycoside hydrolase, carbohydrate-binding; Glycoside hydrolase, family 15; Glycoside hydrolase 15-related; Glucan 1,4-alpha-glucosidase, starch-binding; Six-hairpin glycosidase-like; Carbohydrate-binding-like fold
High	Cersu1_117436	7	3	40	1	39.9	38.7013	3.8485	45.7529		71.9491		YES	Haem peroxidase, plant/fungal/bacterial; Fungal lignin peroxidase; Haem peroxidase
High	Cersu1_119865	8	3	11	3	77.7	1.93829	3.39149	2.08451	4.83968	2.85087	2.75597	NO	Methionyl-tRNA synthetase, class Ia, N-terminal; Aminoacyl-tRNA synthetase, class I (M); Methionyl-tRNA synthetase, class Ia; WHEP-TRS; Aminoacyl-tRNA synthetase, class I, conserved site; S15/NS1, RNA-binding; Aminoacyl-tRNA synthetase, class 1a, anticodon-binding
High	Cersu1_81102	10	3	17	2	36.9	6.90179	6.5239	5.62642	9.18219	1.81465	0.444617	NO	Aldo/keto reductase
High	Cersu1_112675	17	3	13	3	37.1	0.344176	1.31779	0.550385	1.78287	0.430128	1.77594	NO	UBX; Zinc finger, C2H2-type; UBA-like
High	Cersu1_76121	8	3	16	3	41.2	1.50918	3.22284	1.98742	3.715	3.42372	8.05172	YES	Peptidase A1; Peptidase aspartic, active site; Peptidase aspartic, catalytic
High	Cersu1_90010	20	3	5	3	34.5	0.821128	1.1111	0.717628	1.30083	0.637936	1.22466	NO
High	Cersu1_110791	7	3	9	3	58.3	1.95827	2.97656	2.45502	4.28343	1.74767	2.66907	NO	Clathrin adaptor, mu subunit, C-terminal; Longin-like
High	Cersu1_84957	7	3	11	3	48.7	3.83553	1.84384	2.18739	3.17011	1.35914	1.73437	NO	Tyrosyl-tRNA synthetase, class Ib, bacterial/mitochondrial; Aminoacyl-tRNA synthetase, class Ib; Tyrosine tRNA ligase, archaeal/eukaryotic
High	Cersu1_50896	16	3	19	3	28.2	1.72476	1.84774	1.62489	3.24623	2.39315	2.68758	NO	HAD-superfamily hydrolase, subfamily IB, hypothetical 1; HAD-superfamily hydrolase, subfamily IB, PSPase-like
High	Cersu1_79634	19	3	7	3	23.9	2.69846	4.0419	1.16975	5.55446	0.955626	1.77089	NO	Ribosomal protein L15e; Ribosomal protein L23/L15e, core
High	Cersu1_158320	17	3	22	3	27.2	1.83118	2.34071	5.30218	7.43442	8.97105	6.85077	NO	Short-chain dehydrogenase/reductase SDR; Glucose/ribitol dehydrogenase; NAD(P)-binding
High	Cersu1_130306	31	3	11	3	17.7	0.453486	1.52254	0.285808	2.16243	1.19137	1.54096	NO	Primosome PriB/single-strand DNA-binding; Nucleic acid-binding, OB-fold-like
High	Cersu1_84189	8	3	13	3	69.8	10.8444	13.5095	9.88586	20.3687	9.8312	12.1507	YES	Peptidase S53, propeptide; Peptidase S8 and S53, subtilisin, kexin, sedolisin; Proteinase inhibitor, propeptide
High	Cersu1_79992	10	3	6	3	44.3		3.1174	0.654331	3.54255	2.19005	2.69601	NO	Peptidase A1; Peptidase aspartic, active site; Peptidase aspartic, catalytic
High	Cersu1_101450	36	3	9	1	11.7		1.34146		6.09264		4.58801	NO
High	Cersu1_143604	18	3	9	3	15.8	6.81141	4.80487	2.69968	2.6384	2.09495	1.41248	NO	Ribosomal protein L28e
High	Cersu1_79557	21	3	26	3	41.3	22.1625	13.2052	16.7841	14.375	4.51118	6.647	YES	Glycoside hydrolase, family 5; Cellulose-binding region, fungal; Glycoside hydrolase, catalytic core
High	Cersu1_143390	10	3	24	2	39.8			0.243254		4.09984	8.78962	YES	Haem peroxidase, plant/fungal/bacterial; Fungal lignin peroxidase; Haem peroxidase
High	Cersu1_116608	10	3	50	1	40.5				5.58577		12.4419	YES	Haem peroxidase, plant/fungal/bacterial; Fungal lignin peroxidase; Haem peroxidase
High	Cersu1_111339	11	3	10	3	40.4	5.2443	3.75052	4.50822	5.91271	4.28015	3.46674	NO	Isocitrate/isopropylmalate dehydrogenase; Isocitrate dehydrogenase NAD-dependent, mitochondrial
High	Cersu1_85626	5	3	19	3	85.3	3.12029	2.11009	2.65635	5.67767	2.54279	2.77173	NO	Gelsolin region; Zinc finger, Sec23/Sec24-type; Sec23/Sec24 trunk region; Sec23/Sec24 helical region; Sec23/Sec24 beta-sandwich
High	Cersu1_116050	21	3	9	3	38.7	0.618229	1.71061	0.763177	2.74768		0.894313	NO	S1, RNA binding; Eukaryotic translation initiation factor 2, alpha subunit; Nucleic acid-binding, OB-fold-like
High	Cersu1_85552	5	3	10	3	102.1	0.315575	0.885471	0.333818	3.33187		3.3652	NO	WW/Rsp5/WWP; Gelsolin region; Zinc finger, Sec23/Sec24-type; Sec23/Sec24 trunk region; Sec23/Sec24 helical region; Sec23/Sec24 beta-sandwich
High	Cersu1_70235	33	3	23	3	13.9	5.2008	3.24596	4.71243	4.92528	8.09251	16.0923	NO	Ribosomal protein L22e
High	Cersu1_87519	11	3	6	3	43	3.25062	2.70531	1.20855	1.70337	0.905632	0.822467	NO	Acyl-CoA oxidase/dehydrogenase, type 1; Acyl-CoA dehydrogenase/oxidase, central region; Acyl-CoA dehydrogenase, N-terminal; Acyl-CoA dehydrogenase/oxidase C-terminal; Acyl-CoA dehydrogenase/oxidase, middle and N-terminal
High	Cersu1_82487	12	3	9	3	36.4	0.761697	2.77485	1.34442	6.36509	1.2951	7.34629	NO	Activator of Hsp90 ATPase homologue 1-like; Activator of Hsp90 ATPase, N-terminal
High	Cersu1_93269	8	3	30	1	37.6	15.8426		8.94818		4.24655		NO	Alcohol dehydrogenase, zinc-binding; GroES-like; NAD(P)-binding
High	Cersu1_129052	11	3	7	3	43.4	0.829488	0.33544	1.48974	0.826774	2.34401	1.32634	YES	Arginase; Ureohydrolase
High	Cersu1_118364	4	3	8	3	104	1.28564	1.43877	1.23806	2.14683	1.31018	2.29509	NO	HEAT; Armadillo-type fold
High	Cersu1_109145	11	3	13	3	41.7	2.84032	4.60685	1.45304	3.27105	2.49902	4.18598	YES	Metallophosphoesterase
High	Cersu1_46564	17	3	86	3	27.6	89.4949	94.5987	29.9096	88.1192	1.62276	61.2783	YES	Glycoside hydrolase, family 61
High	Cersu1_87377	9	2	6	2	24	2.13877	2.30293	0.786754	2.15868	1.59009	1.41611	NO	Ras GTPase; Ras; Ras small GTPase, Ras type; Ras small GTPase, Rho type; Ras small GTPase, Rab type; Ran GTPase; Small GTP-binding protein
High	Cersu1_116814	2	2	9	2	146.9	1.98066	2.70065	1.70913	2.86801	1.88714	3.21687	NO	Paired amphipathic helix; Histone deacetylase interacting
High	Cersu1_114515	2	2	27	2	162.6	148.987	150.356	114.247	138.883	134.364	114.71	NO	SNF2-related; DNA/RNA helicase, C-terminal; Chromo domain; DEAD-like helicase, N-terminal; Helicase, superfamily 1 and 2, ATP-binding; Homeodomain-like; Chromo domain-like
High	Cersu1_109999	11	2	14	1	23	20.4155	20.033	21.0379	22.0291	19.2781	14.8481	NO	Ras GTPase; Ras; Ras small GTPase, Ras type; Ras small GTPase, Rho type; Ras small GTPase, Rab type; Ran GTPase; Small GTP-binding protein; RNA polymerase sigma factor 54, interaction
High	Cersu1_140432	29	2	6	2	21.1		0.290151		2.31373	1.17346	6.08915	NO	ThiJ/PfpI; DJ-1
High	Cersu1_120138	8	2	15	2	31.7	6.27126	13.4921	4.57465	10.927	2.17771	5.5878	YES	Lipase, class 3; Lipase, active site
High	Cersu1_110489	7	2	7	2	43.8	1.44071	2.30864	1.38977	2.79506	0.902185	2.68335	NO	Thiolase; Thiolase-like
High	Cersu1_116874	13	2	9	2	22.4	2.38185	4.61682	3.32436	6.05852	4.70611	8.87238	NO	NUDIX hydrolase, core; 7,8-dihydro-8-oxoguanine triphosphatase; NUDIX
High	Cersu1_117711	4	2	21	1	59.2	0.32441	1.44349	3.92783	8.73597	7.73083	8.34188	YES	Carboxylesterase, type B
High	Cersu1_113353	5	2	10	2	46.1	7.78403	7.46336	5.50803	7.89709	9.43314	7.66806	NO	Acyl-CoA oxidase/dehydrogenase, type 1; Acyl-CoA dehydrogenase/oxidase, central region; Acyl-CoA dehydrogenase, N-terminal; Acyl-CoA dehydrogenase, conserved site; Acyl-CoA dehydrogenase/oxidase C-terminal; Acyl-CoA dehydrogenase/oxidase, middle and N-terminal
High	Cersu1_121244	2	2	7	2	106.1	5.47835	5.13873	24.3337	17.1231	17.33	9.68472	NO	Amidohydrolase 1; Metal-dependent hydrolase, composite; Immunoglobulin E-set
High	Cersu1_111905	13	2	14	2	34.3	3.40615	6.23634	5.18684	15.7265	2.92623	9.79367	NO
High	Cersu1_87580	10	2	13	2	38.1	15.0568	9.71574	13.6944	5.55162	10.8533		YES	Lipase, GDSL; Cellulose-binding region, fungal; Esterase, SGNH hydrolase-type
High	Cersu1_119355	4	2	19	2	56.6	0.902521	1.87843	0.723433	1.68213	0.604506	1.35779	NO	Chaperonin Cpn60; Chaperonin Cpn60/TCP-1; T-complex protein 1, beta subunit; Chaperonin TCP-1, conserved site; GroEL-like chaperone, ATPase
High	Cersu1_110235	6	2	20	2	44.7	3.11955	3.46632	3.58092	5.73371	2.70258	4.83689	NO	ATP-citrate lyase/succinyl-CoA ligase; ATP-grasp fold, succinyl-CoA synthetase-type; Succinyl-CoA synthetase, beta subunit; Succinyl-CoA synthetase-like
High	Cersu1_116895	11	2	10	2	27.9	3.74853	4.79107	7.16827	10.3429	7.6131	7.108	NO	Short-chain dehydrogenase/reductase SDR; Glucose/ribitol dehydrogenase; NAD(P)-binding
High	Cersu1_79730	19	2	13	2	16	7.1466	0.732432	4.01891	1.11134	3.87894	1.43003	NO	Ribosomal protein S9
High	Cersu1_161651	6	2	8	2	39.5	0.411937	1.41825	0.550376	1.9381	0.490781	1.83167	NO	FAD dependent oxidoreductase
High	Cersu1_117613	3	2	7	2	90.2	2.4187	1.33194	2.59258	1.55876	2.75327	0.958129	NO	Urease, gamma subunit region; Urease, beta subunit; Urease, alpha subunit; Urease alpha-subunit, N-terminal; Amidohydrolase 1; Urease, gamma/beta/alpha type; Metal-dependent hydrolase, composite
High	Cersu1_85760	13	2	8	2	13.2	0.933034	5.70754	1.14792	11.3371	0.913069	13.4841	NO	High mobility group box, HMG1/HMG2, subgroup; High mobility group box, HMG1/HMG2; High mobility group box, HMG
High	Cersu1_111264	6	2	8	2	71.2	2.09039	1.99877	2.4174	4.04656	2.48698	2.8306	NO	B3/B4 tRNA-binding domain; tRNA synthetase, B5; Phenylalanyl-tRNA synthetase, class IIc, beta subunit, archae/euk cytosolic; Putative DNA binding
High	Cersu1_71212	18	2	12	2	14.8	4.61022	3.56719	3.81743	5.05008	3.5073	6.23259	NO	Ribosomal protein S25
High	Cersu1_112000	16	2	9	2	18.6	7.03822	8.20023	2.9275	7.74321	2.0603	3.67225	NO	Ribosomal protein L25/L23; Ribosomal protein L23/L25, N-terminal; Ribosomal protein L23, conserved site; Ribosomal protein L23/L15e, core
High	Cersu1_110571	11	2	10	2	38	3.69271	2.87839	1.52444	2.5631	1.75735	2.23127	NO	Survival protein SurE-like phosphatase/nucleotidase
High	Cersu1_97266	20	2	6	2	17.5	9.97442	4.08438	1.39069	0.530427	0.530655	0.141337	NO	Expansin 45, endoglucanase-like; Barwin-related endoglucanase
High	Cersu1_113474	5	2	43	2	62.4	8.64735	10.9821	23.897	25.474	27.5419	28.5066	NO
High	Cersu1_143707	12	2	11	2	29	0.963151	2.4557	1.16162	3.23867	3.96774	9.77464	YES	Ribonuclease T2
High	Cersu1_112388	3	2	14	2	102.7		0.349921	1.00584	3.75961	3.33005	15.762	NO	Tetratricopeptide TPR-1; PRP1 splicing factor, N-terminal; Tetratricopeptide TPR2; Tetratricopeptide region; RNA-processing protein, HAT helix
High	Cersu1_115659	26	2	7	2	14.7		1.23657		4.67986		3.47414	NO	Ribosomal protein L14b/L23e
High	Cersu1_92873	6	2	6	2	39.8			1.2715	0.975015	3.62847	2.34259	NO	2OG-Fe(II) oxygenase
High	Cersu1_111420	12	2	9	2	25.3	1.29641	1.97377	1.60426	3.73397	1.2904	1.55905	NO	Haloacid dehalogenase-like hydrolase; HAD-superfamily hydrolase, subfamily IA, variant 3
High	Cersu1_84059	6	2	10	2	33.8	1.37804	0.644887	1.31347	0.940889	1.65201	1.07478	NO	Molybdopterin binding
High	Cersu1_80185	8	2	8	2	55.3	1.88288	2.92299	0.824905	2.03846	1.32538	2.60687	YES	Uncharacterised conserved protein UCP028846; Six-hairpin glycosidase-like
High	Cersu1_79350	6	2	8	2	43.8	3.34945	3.06011	6.9392	6.35096	5.7101	5.76512	NO
High	Cersu1_117594	4	2	10	2	82	2.25661	1.72277	1.63701	2.12011	1.97129	1.16038	NO	Protein of unknown function UPF0061; Haem peroxidase, plant/fungal/bacterial
High	Cersu1_117490	8	2	12	2	49.7	3.46564	4.4663	4.20983	5.25233	1.355	2.45111	YES	Glycoside hydrolase, family 18, catalytic domain; Carbohydrate-binding family V/XII; Aminoacyl-tRNA synthetase, class I, conserved site; Glycoside hydrolase, chitinase active site; Glycoside hydrolase, catalytic core
High	Cersu1_103670	6	2	10	2	72.2	82.576	52.4958	79.1769	64.9688	139.003	81.9992	NO	Bicarbonate transporter, C-terminal
High	Cersu1_45376	10	2	7	2	42.6	2.07602	2.03802	2.20163	3.98028	3.04092	3.53389	NO	Leucine-rich repeat; Leucine-rich repeat, ribonuclease inhibitor subtype
High	Cersu1_83014	10	2	7	2	49.3	0.828433	0.584052	0.947835	2.45858	1.09882	2.44145	NO	Peptidase M19, renal dipeptidase
High	Cersu1_118376	4	2	16	2	68.4	3.1052	5.32517	2.71744	5.5723	4.34442	6.46637	YES	Metallophosphoesterase; Predicted phosphoesterase, C1039.02 type; 5'-Nucleotidase, conserved site
High	Cersu1_85426	6	2	37	2	58.8	7.81451	5.21253	11.3627	13.0717	34.6148	26.9942	YES	Glycoside hydrolase, family 47
High	Cersu1_66688	11	2	41	2	35.5	78.6152	67.0687	66.8178	76.1874	8.22198	8.0976	YES	Cellulose-binding region, fungal; Glycoside hydrolase, family 61
High	Cersu1_81293	6	2	11	2	62.1	3.11637	1.85513	2.40281	2.86999	1.12079	1.11015	NO	AMP-dependent synthetase and ligase
High	Cersu1_114660	19	2	7	2	34.6	3.33817	3.79206	1.62963	2.82969	0.283608		YES	Glycoside hydrolase, chitinase active site; Glycoside hydrolase, catalytic core
High	Cersu1_118801	6	2	16	2	55.6	11.9678	22.8608	3.52315	3.19918	2.00429	2.28155	YES	Multicopper oxidase, type 1; Multicopper oxidase, type 2; Multicopper oxidase, type 3; Multicopper oxidase, copper-binding site; Cupredoxin
High	Cersu1_86074	14	2	7	2	24.6	2.66	4.17655	1.65229	3.78459	2.26455	4.12105	NO	Phosphoribosyltransferase; Orotate phosphoribosyl transferase
High	Cersu1_86691	15	2	10	2	16.4	0.847608	4.11233	2.79537	4.59238	2.50091	4.20113	NO	Eukaryotic initiation factor 1A (eIF-1A); S1, IF1 type; Nucleic acid-binding, OB-fold-like
High	Cersu1_112576	5	2	11	2	51	1.86349	3.3664	3.20766	4.98008	5.80495	9.52902	YES	Glycoside hydrolase, catalytic core
High	Cersu1_116597	6	2	6	2	51.9	3.47569	2.35556	2.89514	2.71943	1.54144	1.58285	NO	Protein synthesis factor, GTP-binding; Translation elongation factor EFTu/EF1A, domain 2; Initiation factor eIF2 gamma, C terminal; Translation elongation and initiation factors/Ribosomal, beta-barrel; Translation elongation factor EF1A/initiation factor IF2gamma, C-terminal
High	Cersu1_146244	2	2	13	2	93.7	13.7063	17.4428	13.143	16.6293	13.141	17.352	NO	DNA helicase, ATP-dependent, Ku type; Ku70/Ku80, N-terminal alpha/beta; Ku, C-terminal; von Willebrand factor, type A; Spen Paralogue and Orthologue C-terminal-like
High	Cersu1_111259	8	2	10	2	58.6	0.683766	0.809003	0.896736	2.15096	1.14564	1.82607	NO	Phenylalanyl-tRNA synthetase, class IIc; Phenylalanyl-tRNA synthetase, class IIc, alpha subunit; Aminoacyl-tRNA synthetase, class II
High	Cersu1_104828	4	2	15	2	65.6	21.792	29.1734	9.67652	17.3761	7.99291	9.91402	NO	SKIP/SNW
High	Cersu1_109865	10	2	30	2	27.2	1.6301	2.31947	1.64082	4.19873	2.92716	5.40383	NO	Haloacid dehydrogenase/epoxide hydrolase; Haloacid dehalogenase-like hydrolase; Haloacid dehalogenase, type II; HAD-superfamily hydrolase, subfamily IA, variant 2
High	Cersu1_81928	19	2	8	2	17.9	0.904983	0.950031	1.63153	1.08071	1.95381	0.90254	NO	RNA binding motif protein 8; RNA recognition motif, RNP-1
High	Cersu1_82176	8	2	7	2	44.5	1.55693	1.86181	2.44766	3.52716	2.941	3.48836	NO	K Homology, type 1; K Homology
High	Cersu1_86562	5	2	9	2	55.1	2.54326	1.9555	2.24752	2.54812	1.54518	2.18393	NO	Adenylate cyclase-associated CAP, N-terminal; Adenylate cyclase-associated CAP, C-terminal; CARP motif; Adenylate cyclase-associated CAP
High	Cersu1_150302	5	2	10	2	42.2	3.67528	2.03895	1.90964	1.29971	1.86817	1.24504	YES	Pectinesterase, catalytic; Pectin lyase fold/virulence factor
High	Cersu1_50219	13	2	21	2	35.3	4.23029	2.88187	5.06127	6.16588	5.98301	5.06502	NO	GHMP kinase
High	Cersu1_50297	8	2	20	1	40.9				2.07311			YES	Haem peroxidase, plant/fungal/bacterial; Fungal lignin peroxidase; Haem peroxidase
High	Cersu1_116802	15	2	9	2	19.6	1.18708	1.3936	1.54841	1.86219	2.03553	3.50946	NO	Cupin 2, conserved barrel; Cupin, RmlC-type
High	Cersu1_115914	15	2	34	1	19.6						0.580854	NO	Peptidyl-prolyl cis-trans isomerase, cyclophilin-type; Cyclophilin-like
High	Cersu1_44216	7	2	11	2	32.5	3.08164	4.33083	2.70839	4.36978	4.49113	4.57736	NO	Quinolinate phosphoribosyl transferase; Nicotinate-nucleotide pyrophosphorylase
High	Cersu1_120256	8	2	13	2	36.8	4.6098	5.07784	4.76091	5.42194	4.57836	4.36606	NO	Alcohol dehydrogenase, zinc-binding; Alcohol dehydrogenase GroES-like; GroES-like; NAD(P)-binding
High	Cersu1_53128	14	2	10	2	23.8	10.2459	9.87629	7.43827	7.95254	5.86386	5.37284	NO	Alpha/beta hydrolase fold-3
High	Cersu1_119418	10	2	12	2	29.1	47.6939	21.8637	6.43648	22.5139	1.97338	1.58991	NO	Src homology-3; Neutrophil cytosol factor 2; Spectrin alpha chain
High	Cersu1_110859	7	2	8	2	44.1	0.831468	2.828	1.13979	3.53157	1.61286	5.09188	NO	Taurine catabolism dioxygenase TauD/TfdA
High	Cersu1_116883	7	2	36	1	44.9		17.9062		84.0943		41.8723	NO	Aldo/keto reductase
High	Cersu1_79774	11	2	12	1	21.4	5.42063	2.74615	3.51588	6.70845	5.07963	4.29304	NO	Ras GTPase; Ras; Ras small GTPase, Ras type; Ras small GTPase, Rho type; Ras small GTPase, Rab type; Small GTP-binding protein
High	Cersu1_119369	11	2	7	2	35.7	1.09858	1.29937	0.734511	2.43754	0.926753	2.23737	NO	von Willebrand factor, type A; Ubiquitin interacting motif
High	Cersu1_92216	8	2	8	1	34.6		1.63182	1.17764	1.34705	1.44844		NO	Aldo/keto reductase
High	Cersu1_124938	7	2	9	2	59.3	3.40731	2.64622	3.24126	2.45168	3.15706	2.87664	YES	Glycoside hydrolase, catalytic core
High	Cersu1_42386	4	2	10	2	117.2	89.6886	2.09504	105.403		113.522	2.3839	NO	ATPase, P-type, K/Mg/Cd/Cu/Zn/Na/Ca/Na/H-transporter; ATPase, P-type cation exchange, alpha subunit; E1-E2 ATPase-associated region; ATPase, P-type cation-transporter, C-terminal; ATPase, P-type cation-transporter, N-terminal; Haloacid dehalogenase-like hydrolase
High	Cersu1_130746	2	2	12	1	108.8		1.56155		1.38376		1.15072	NO	WD40 repeat; Small-subunit processome, Utp12; WD40 repeat-like

## Sheet: Obbri_Common in all 3 t.p.
Supplementary Table S1(G): O. rivulosa CAZymes detected in all three time points in solid spruce wood cultivations.
Enzyme abbreviation: AOX = alcohol oxidase, AGL = α-1,4-galactosidase, AGU = α-glucuronidase, BGL = β-1,4-glucosidase, BXL = β-1,4-xylosidase, CBHI = cellobiohydrolase (reducing end), CDH = cellobiose dehydrogenase, EGL= β-1,4-endoglucanase,
GE = 4-O-methyl-glucuronyl methylesterase, GOX = glucose oxidase, HAE = hemicellulose acetylesterase, LAC = β-1,4-galactosidase, LPMO = lytic polysaccharide monooxygenase, MAN = β-1,4-endomannanase, MND = β-1,4-mannosidase, XG-EG = xyloglucanase, XLN = β-1,4-endoxylanase.
Protein ID	CAZy	Enzyme	Description	Plant biomass substrate
885712	AA3_2	GOX	GMC oxidoreductase	H2O2-supply
790443	AA3_3	AOX	GMC oxidoreductase	H2O2-supply
664751	AA8-AA3_1	CDH	Iron reductase domain / GMC oxidoreductase	cellulose
770661	GH1	BGL	Glycoside Hydrolase Family 1 protein	cellulose
813927	GH2	MND	Glycoside Hydrolase Family 2 protein	galacto(gluco)mannan
753990	GH2	MND	Glycoside Hydrolase Family 2 protein	galacto(gluco)mannan
627233	GH3	BGL	Glycoside Hydrolase Family 3 protein	cellulose
788396	GH3	BGL	Glycoside Hydrolase Family 3 protein	cellulose
784936	GH3	BGL	Glycoside Hydrolase Family 3 protein	cellulose
788967	CBM1-GH5_5	EGL	Carbohydrate-Binding Module Family 1 / Glycoside Hydrolase Family 5 protein	cellulose
719765	GH5_7	MAN	Glycoside Hydrolase Family 5 protein	galacto(gluco)mannan
641261	CBM1-GH5_7	MAN	Carbohydrate-Binding Module Family 1 / Glycoside Hydrolase Family 5 protein	galacto(gluco)mannan
819531	GH5_22	BXL	Glycoside Hydrolase Family 5 protein	xylan
826236	GH5_22	BXL	Glycoside Hydrolase Family 5 protein	xylan
731121	GH7-CBM1	CBHI	Glycoside Hydrolase Family 7 / Carbohydrate-Binding Module Family 1 protein	cellulose
91658	GH7-CBM1	CBHI	Glycoside Hydrolase Family 7 / Carbohydrate-Binding Module Family 1 protein	cellulose
838746	CBM1-GH10	XLN	Carbohydrate-Binding Module Family 1 / Glycoside Hydrolase Family 10 protein	xylan
762583	CBM1-GH10	XLN	Carbohydrate-Binding Module Family 1 / Glycoside Hydrolase Family 10 protein	xylan
849432	GH27	AGL	Glycoside Hydrolase Family 27 protein	galacto(gluco)mannan
849398	GH27	AGL	Glycoside Hydrolase Family 27 protein	galacto(gluco)mannan
789567	GH35	LAC	Glycoside Hydrolase Family 35 protein	diverse
726547	GH115	AGU	Glycoside Hydrolase Family 115 protein	xylan
812963	GH131	EGL	Glycoside Hydrolase Family 131 protein	cellulose
762191	CE15	GE	Carbohydrate Esterase Family 15 protein	xylan
724015	CE16	HAE	Carbohydrate Esterase Family 16 protein	hemicellulose
796835	AA9	LPMO	Lytic polysaccharide monooxygenase	diverse
833133	AA9-CBM1	LPMO	Lytic polysaccharide monooxygenase / Carbohydrate-Binding Module Family 1	diverse

## Sheet: Gelsu_Common in all 3 t.p.
Supplementary Table S1(H): G. subvermispora CAZymes detected in all three time points in solid spruce wood cultivations.
Enzyme abbreviation: AAO = aryl alcohol oxidase, ABF = α-arabinofuranosidase, AGL = α-1,4-galactosidase, AGU = α-glucuronidase, AOX = alcohol oxidase, BGL = β-1,4-glucosidase, BXL = β-1,4-xylosidase,
CDH = cellobiose dehydrogenase, EGL=β-1,4-endoglucanase, HAE = hemicellulose acetylesterase, LPMO = lytic polysaccharide monooxygenase, MAN = β-1,4-endomannanase, MND = β-1,4-mannosidase, MnP = manganese peroxidase, XLN = β-1,4-endoxylanase.
Protein ID	CAZy	Enzyme	Description	Plant biomass substrate
105539	AA2	MnP	Class II peroxidase	lignin
49863	AA2	MnP	Class II peroxidase	lignin
50686	AA2	MnP	Class II peroxidase	lignin
117436	AA2	MnP	Class II peroxidase	lignin
84557	AA3_2	AAO	GMC oxidoreductase	H2O2-supply
80773	AA3_3	AOX	GMC oxidoreductase	H2O2-supply
84792	AA8-AA3_1	CDH	Iron reductase domain / GMC oxidoreductase	cellulose
85474	AA9	LPMO	Lytic polysaccharide monooxygenase	diverse
46564	AA9	LPMO	Lytic polysaccharide monooxygenase	diverse
66688	AA9-CBM1	LPMO	Lytic polysaccharide monooxygenase / Carbohydrate-Binding Module Family 1	diverse
86259	GH1	BGL	Glycoside Hydrolase Family 1 protein	cellulose
117774	GH2	MND	Glycoside Hydrolase Family 2 protein	galacto(gluco)mannan
80500	GH2	MND	Glycoside Hydrolase Family 2 protein	galacto(gluco)mannan
117120	GH3	BGL	Glycoside Hydrolase Family 3 protein	cellulose
118496	GH3	BGL	Glycoside Hydrolase Family 3 protein	cellulose
79557	CBM1-GH5_5	EGL	Carbohydrate-Binding Module Family 1 / Glycoside Hydrolase Family 5 protein	cellulose
147790	GH5_7	MAN	Glycoside Hydrolase Family 5 protein	galacto(gluco)mannan
94795	CBM1-GH5_7	MAN	Carbohydrate-Binding Module Family 1 / Glycoside Hydrolase Family 5 protein	galacto(gluco)mannan
115721	GH5_22	BXL	Glycoside Hydrolase Family 5 protein	xylan
136606	GH7-CBM1	CBHI	Glycoside Hydrolase Family 7 / Carbohydrate-Binding Module Family 1 protein	cellulose
116326	GH10	XLN	Glycoside Hydrolase Family 10 protein	xylan
85545	GH10	XLN	Glycoside Hydrolase Family 10 protein	xylan
59733	CBM1-GH10	XLN	Carbohydrate-Binding Module Family 1 / Glycoside Hydrolase Family 10 protein	xylan
85281	GH27	AGL	Glycoside Hydrolase Family 27 protein	galacto(gluco)mannan
162360	GH51	ABF	Glycoside Hydrolase Family 51 protein	diverse
113951	GH115	AGU	Glycoside Hydrolase Family 115 protein	xylan
111905	GH131	EGL	Glycoside Hydrolase Family 131 protein	cellulose
118322	CE15	GE	Carbohydrate Esterase Family 15 protein	xylan
107901	CE16	HAE	Carbohydrate Esterase Family 16 protein	hemicellulose
87580	CBM1-CE16	HAE	Carbohydrate-Binding Module Family 1 / Carbohydrate Esterase Family 16 protein	hemicellulose

## Sheet: Obbri_all PCWDE CAZy Orthologs
Supplementary Table S1(I): All O. rivulosa plant cell wall degrading CAZymes and their respecive orthologs in G. subvermispora. Marked in bold are the detected putative proteins. Protein clusters unique to O. rivulosa are underlined.
	Prot ID #	CAZy	Orthologs (Prot IDs of G. subvermispora)	Clusters	Note
	452017	AA1_1	118801, 88089,84170, 115063, 115068, 137686, 108852	OG_25:
	596333	AA1	51376	OG_250:
	726849	AA1_1	88089, 118801, 84170, 115063, 115068, 137686, 108852	OG_25:
	736636	AA1_1	88089, 118801, 84170, 115063, 115068, 137686, 108852	OG_25:
	741387	AA1_1	88089, 118801, 84170, 115063, 115068, 137686, 108852	OG_25:
	814238	AA1_1	88089, 118801, 84170, 115063, 115068, 137686, 108852	OG_25:
	867863	AA1_1	88089, 118801, 84170, 115063, 115068, 137686, 108852	OG_25:
	875588	AA1_1	88089, 118801, 84170, 115063, 115068, 137686, 108852	OG_25:
	890919	AA1_1	88089, 118801, 84170, 115063, 115068, 137686, 108852	OG_25:
	60162	AA2	50686, 114036, 49863, 94398, 50297, 139965, 116608, 157986, 117436, 143390, 114076, 105539	OG_81:
	323916	AA2	50686, 114036, 49863, 94398, 50297, 139965, 116608, 157986, 117436, 143390, 114076, 105539	OG_81:
	412406	AA2	124076, 99382, 118677	OG_38:
	438941	AA2	49863, 50686, 94398, 105539, 117436, 114036, 50297, 139965, 116608, 157986, 143390, 114076	OG_81:
	511960	AA2	49863, 50686, 94398, 105539, 117436, 114036, 50297, 139965, 116608, 157986, 143390, 114076	OG_81:
	727100	AA2	49863, 50686, 94398, 105539, 117436, 114036, 50297, 139965, 116608, 157986, 143390, 114076	OG_81:
	729972	AA2	50686, 114036, 49863, 94398, 50297, 139965, 116608, 157986, 117436, 143390, 114076, 105539	OG_81:
	770945	AA2_cyt	83438	OG_2077:
	803460	AA2	112162	OG_15178:
	806545	AA2	--	OG_24958:
	813497	AA2	--	OG_23831:
	825700	AA2	50686, 114036, 49863, 94398, 50297, 139965, 116608, 157986, 117436, 143390, 114076, 105539	OG_81:
	835392	AA2	--	OG_24219:
	835715	AA2	--	OG_24231:
	835716	AA2	124076, 99382, 118677	OG_38:
	891614	AA2	49863, 50686, 94398, 105539, 117436, 114036, 50297, 139965, 116608, 157986, 143390, 114076	OG_81:
	725321	AA3_2	137959, 84544, 117387, 107938, 118493	OG_133:
	731504	AA3_2	105302, 87836	OG_8664:
	732948	AA3_2	47053	OG_1012:
	735182	AA3_2	137959, 84544, 117387, 107938, 118493	OG_133:
	769671	AA3_2	79287, 91113, 91114, 115252, 84557	OG_95:
	773345	AA3_2	137959, 84544, 117387, 107938, 118493	OG_133:
	789242	AA3_2	79287, 91113, 91114, 115252, 84557	OG_95:
	795098	AA3_2	137959, 84544, 117387, 107938, 118493	OG_133:
	804770	AA3_2	116159	OG_456:
	814313	AA3_2	137959, 84544, 117387, 107938, 118493	OG_133:
	815690	AA3_2	47053	OG_1012:
	829135	AA3_2	--	OG_23957:
	830066	AA3_2	--	OG_22818:
	837570	AA3_2	137959, 84544, 117387, 107938, 118493	OG_133:
	840330	AA3_2	--	OG_24749:
	885712	AA3_2	115252, 84557, 79287, 91113, 91114	OG_95:
	790443	AA3_3	80773	OG_2899:
	564635	AA3_3	139982, 86996, 117749	OG_228:
	792863	AA3_3	139982, 86996, 117749	OG_228:
	814600	AA3_3	139982, 86996, 117749	OG_228:
	875460	AA3_3	139982, 86996, 117749	OG_228:
	35182	AA5_1	155904	OG_3244:
	661935	AA5_1	115979	OG_3289:
	759764	AA5_1	48364	OG_5123:
	826706	AA5_1	155904	OG_3244:
	664751	AA8-AA3_1	84792	OG_1224:
	519691	AA9	--	OG_8102:
	739314	AA9	124745	OG_15408:
	781628	AA9-CBM1	89533, 89534	OG_3295:
	794851	AA9	115696, 78941	OG_1260:
	796835	AA9	85474, 85414	OG_1313:
	799019	AA9	66688	OG_7096:
	821398	AA9	85474, 85414	OG_1313:
	833133	AA9-CBM1	46564	OG_3304:
	731281	GH1	83802, 86259	OG_419:
	770661	GH1	83802, 86259	OG_419:
	889978	GH1	116651	OG_11591:
	753990	GH2	80500, 111766	OG_364:
	813927	GH2	117774, 117829	OG_472:
	815162	GH2	80500, 111766	OG_364:
	14692	GH3	118496, 110246	OG_46:
	337845	GH3	111694	OG_3751:
	627233	GH3	118496, 110246	OG_46:
	627302	GH3	118496, 110246	OG_46:
	784936	GH3	117120, 117333	OG_125:
	788396	GH3	117120, 117333	OG_125:
	273202	GH5	114663	OG_15303:
	788967	CBM1-GH5_5	79557	OG_4758:
	789780	CBM1-GH5_5	117046	OG_5475:
	641261	CBM1-GH5_7	94795	OG_784:
	719765	GH5_7	147790	OG_784:
	819531	GH5_22	115721, 115728	OG_475:
	826236	GH5_22	115721, 115728	OG_475:
	476379	CBM1-GH6	72777	OG_932:
	91658	GH7-CBM1	89943, 109983, 136606	OG_109:
	731121	GH7-CBM1	89943, 109983, 136606	OG_109:
	762583	CBM1-GH10	59733, 67561, 97858	OG_371:
	782683	GH10	53412, 85545	OG_4347:
	786094	GH10	116326	OG_15420:
	799009	GH10	53412, 85545	OG_4347:
	838746	CBM1-GH10	59733, 67561, 97858	OG_371:
	851185	CBM1-GH10	59733, 67561, 97858	OG_371:
	726082	GH12	111819	OG_4372:
	813284	GH12	34428	OG_2309:
	616587	GH13_1	113851, 87750	OG_190:
	735014	GH13_1	113851, 87750	OG_190:
	789297	GH13_5	--	OG_2199:
	725317	GH13_32-CBM20	93449, 156021	OG_3215:
	791064	GH15-CBM20	81122, 112301	OG_326:
	812469	GH15-CBM20	81122, 112301	OG_326:
	833127	GH15	80925	OG_3431:
	13793	GH27	162503, 112059	OG_383:
	810034	GH27	114492	OG_565:
	849398	GH27	85281, 85285	OG_1250:
	849432	GH27	85281, 85285	OG_1250:
	206352	GH28	145765, 75172	OG_393:
	742544	GH28	145765, 75172	OG_393:
	793237	GH28	116013, 114853	OG_778:
	820050	GH28	65679, 75795	OG_328:
	875830	GH28	116013, 114853	OG_778:
	169586	GH31	158616, 109853, 109854	OG_89:
	736445	GH31	158616, 109853, 109854	OG_89:
	788201	GH31	135553	OG_3440:
	793998	GH31	119754	OG_877:
	837500	GH31	109853, 109854, 158616	OG_89:
	891711	GH31	109853, 109854, 158616	OG_89:
	789567	GH35	110070	OG_151:
	548101	GH43	81178	OG_451:
	729166	GH43	81178	OG_451:
	753033	GH45	82023	OG_3780:
	773627	GH45	50837	OG_5233:
	834143	GH45	72466	OG_15225:
	760626	GH51	139314	OG_3766:
	790347	GH51	162360	OG_730:
	723211	GH53	62991	OG_3669:
	808997	GH74	79435	OG_789:
	735541	GH78	54416	OG_524:
	738866	GH95	115143	OG_2999:
	726547	GH115	113951, 139624	OG_491:
	742368	GH115	113951, 139624	OG_491:
	812963	GH131	--	OG_4336:
	812977	GH131	111905	OG_7200:
	721831	CE15	21396, 118322	OG_943
	762191	CE15	21396, 118322	OG_943
	749512	CE16	87580	OG_1182

## Sheet: Gelsu_all PCWDE CAZy Orthologs
Supplementary Table S1(J): All G. subvermispora plant cell wall degrading CAZymes and their respecive orthologs in O. rivulosa. Marked in bold are the detected putative proteins. Protein clusters unique to G. subvermispora are underlined.
	Prot ID #	CAZy	Orthologs (Prot IDs of O. rivulosa)	Clusters	Note
	51376	AA1	596333	OG_250:
	84170	AA1_1	890919, 741387, 867863, 452017, 726849, 875588, 814238, 736636	OG_25:
	88089	AA1_1	890919, 741387, 867863, 452017, 726849, 875588, 814238, 736636	OG_25:
	108852	AA1_1	890919, 741387, 867863, 452017, 726849, 875588, 814238, 736636	OG_25:
	115063	AA1_1	890919, 741387, 867863, 452017, 726849, 875588, 814238, 736636	OG_25:
	115068	AA1_1	890919, 741387, 867863, 452017, 726849, 875588, 814238, 736636	OG_25:
	118801	AA1_1	452017, 890919, 741387, 867863,726849, 875588, 814238, 736636	OG_25:
	137686	AA1_1	890919, 741387, 867863, 452017, 726849, 875588, 814238, 736636	OG_25:
	49863	AA2	438941, 727100, 891614, 323916, 511960, , 825700, 729972, 60162	OG_81:
	50297	AA2	838260, 639237, 731963, 800145	OG_37:
	50686	AA2	438941, 727100, 891614, 323916, 511960, , 825700, 729972, 60162	OG_81:
	94398	AA2	438941, 727100, 891614, 323916,511960, , 825700, 729972, 60162	OG_81:
	99382	AA2	412406, 835716	OG_38:
	105539	AA2	438941, 727100, 891614, 323916, 511960, , 825700, 729972, 60162	OG_81:
	112162	AA2	803460	OG_15178:
	114036	AA2	323916, 891614, 438941, 511960, 727100, 825700, 729972, 60162	OG_81:
	114041	AA2	--	OG_17923:
	114076	AA2	323916, 891614, 438941, 511960, 727100, 825700, 729972, 60162	OG_81:
	116608	AA2	438941, 727100, 891614, 323916, 511960, , 825700, 729972, 60162	OG_81:
	117436	AA2	438941, 727100, 891614, 323916, 511960, , 825700, 729972, 60162	OG_81:
	118677	AA2	412406, 835716	OG_38:
	124076	AA2	412406, 835716	OG_38:
	139965	AA2	323916, 891614, 438941, 511960, 727100, 825700, 729972, 60162	OG_81:
	143390	AA2	438941, 727100, 891614, 323916, 511960, , 825700, 729972, 60162	OG_81:
	157986	AA2	438941, 727100, 891614, 323916, 511960, , 825700, 729972, 60162	OG_81:
	47053	AA3_2	815690, 732948	OG_1012:
	79287	AA3_2	789242, 769671, 885712	OG_95:
	84404	AA3_2	764247, 771972	OG_556:
	84544	AA3_2	735182, 837570, 725321, 773345, 795098, 814313	OG_133:
	84557	AA3_2	885712, 789242, 769671	OG_95:
	86745	AA3_2	790630	OG_3993:
	87836	AA3_2	731504	OG_8664:
	91113	AA3_2-AA3_2	789242, 769671, 885712	OG_95:
	91114	AA3_2	789242, 769671, 885712	OG_95:
	115252	AA3_2	885712, 789242, 769671	OG_95:
	105302	AA3_2	731504	OG_8664:
	116159	AA3_2	804770	OG_456:
	107938	AA3_2	735182, 837570, 725321, 773345, 795098, 814313	OG_133:
	117387	AA3_2	735182, 837570, 725321, 773345, 795098, 814313	OG_133:
	118493	AA3_2	735182, 837570, 725321, 773345, 795098, 814313	OG_133:
	137959	AA3_2	735182, 837570, 725321, 773345, 795098, 814313	OG_133:
	80773	AA3_3	790443	OG_2899:
	86996	AA3_3	792863, 564635, 875460, 814600	OG_228:
	117749	AA3_3	792863, 564635, 875460, 814600	OG_228:
	139982	AA3_3	792863, 564635, 875460, 814600	OG_228:
	48364	AA5_1	759764	OG_5123:
	115979	AA5_1	661935	OG_3289:
	155904	AA5_1	35182, 826706	OG_3244:
	84792	AA8-AA3_1	664751	OG_1224:
	46564	AA9	833133	OG_3304:
	66688	AA9-CBM1	799019	OG_7096:
	85474	AA9	796835, 821398	OG_1313:
	115696	AA9	794851	OG_1260:
	124745	AA9	739314	OG_15408:
	78941	AA9	789414	OG_708:
	85414	AA9	796835, 821398	OG_1313:
	89533	AA9-CBM1	781628	OG_3295:
	89534	AA9-CBM1	781628	OG_3295:
	83802	GH1	731281, 770661	OG_419:
	86259	GH1	731281, 770661	OG_419:
	116651	GH1	889978	OG_11591:
	80500	GH2	753990, 815162	OG_364:
	111766	GH2	815163	OG_364:
	117774	GH2	813927	OG_472:
	117829	GH2	813927	OG_472:
	110246	GH3	14692, 627302, 627233	OG_46:
	111694	GH3	337845	OG_3751:
	117120	GH3	788396, 784936	OG_125:
	117333	GH3	784936, 788396	OG_125:
	118496	GH3	14692, 627233, 627302	OG_46:
	79557	GH5_5	788967	OG_4758:
	117046	GH5_5	789780	OG_5475:
	94795	GH5_7	641261	OG_784:
	147790	GH5_7	719765	OG_784:
	115721	GH5_22	819531, 826236	OG_475:
	115728	GH5_22	819531, 826236	OG_475:
	72777	CBM1-GH6	476379	OG_932:
	89943	GH7-CBM1	91658, 731121	OG_109:
	109983	GH7	91658, 731121	OG_109:
	136606	GH7-CBM1	91658, 731121	OG_109:
	53412	GH10	799009, 782683	OG_4347:
	59733	CBM1-GH10	762583, 838746, 851185	OG_371:
	67561	CBM1-GH10	762583, 838746, 851185	OG_371:
	85545	GH10	799009, 782683	OG_4347:
	97858	CBM1-GH10	762583, 838746, 851185	OG_371:
	116326	GH10	786094	OG_15420:
	121827	GH11-CBM1	--	OG_3983:
	34428	GH12	813284	OG_2309:
	111819	GH12	726082	OG_4372:
	93449	GH13	725317	OG_3215:
	87750	GH13_1	616587, 735014	OG_190:
	113851	GH13_1	616587, 735014	OG_190:
	156021	GH13_32-CBM20	725317	OG_3215:
	80925	GH15	833127	OG_3431:
	81122	GH15-CBM20	791064, 812469	OG_326:
	112301	GH15-CBM20	791064, 812469	OG_326:
	85281	GH27	849398, 849432	OG_1250:
	85285	GH27	849398, 849432	OG_1250:
	110265	GH27	13793	OG_469:
	114492	GH27	810034	OG_565:
	65679	GH28	820050	OG_328:
	75172	GH28	742544, 206352	OG_393:
	75795	GH28	820050	OG_328:
	114853	GH28	875830, 793237	OG_778:
	116013	GH28	875830, 793237	OG_778:
	145765	GH28	742544, 206352	OG_393:
	109853	GH31	736445, 169586, 837500, 891711	OG_89:
	109854	GH31	736445, 169586, 837500, 891711	OG_89:
	119754	GH31	793998	OG_877:
	135553	GH31	788201	OG_3440:
	158616	GH31	736445, 169586, 837500, 891711	OG_89:
	110070	GH35	789567	OG_151:
	81178	GH43	729166, 548101	OG_451:
	111990	GH43	--	OG_18162:
	72466	GH45	834143	OG_15225:
	82023	GH45	753033	OG_3780:
	139314	GH51	760626	OG_3766:
	162360	GH51	790347	OG_730:
	27988	GH53	--	OG_8640:	Fragment
	61145	GH53	--	OG_8640:	Fragment
	61193	GH53	--	OG_8640:	Fragment
	62991	GH53	723211	OG_3669:	Fragment
	91809	GH53	890704, 758493	OG_439:
	101748	GH53	--	OG_17166:	Fragment
	54416	GH78	735541	OG_524:
	79435	GH74-CBM1	808997	OG_789:
	115143	GH95	738866	OG_2999:
	113951	GH115	726547, 742368	OG_491:
	139624	GH115	726547, 742368	OG_491:
	111905	GH131	761220, 731666	OG_230:
	68569	CE1	260257, 792896	OG_1014
	21396	CE15	721831, 762191	OG_943
	118322	CE15	721831, 762191	OG_943
	87580	CE16	749512	OG_1182
